# Supplementary material for: Gender-Related Effect in Oxygenation Dynamics by Using Far-Infrared Intervention with Near-Infrared Spectroscopy Measurement: A Gender Differences Controlled Trial
Source: PLoS One. 2015 Nov 10;10(11):e0135166. doi: 10.1371/journal.pone.0135166 (PMC4640828; doi:10.1371/journal.pone.0135166)
Supplement: S2 File — (XLSX) [file pone.0135166.s002.xlsx]

## Sheet: 工作表1
50	0.0524	0.0349
51	0.0618	0.0209
52	0.0419	0.0279
53	0.0419	0.0279
54	0.0419	0.0279
55	0.0419	0.0279
56	0.0221	0.0349
57	0.0315	0.021
58	0.0116	0.028
59	0.021	0.014
60	0.0011	0.021
61	0.0011	0.021
62	-0.0093	0.014
63	-0.0292	0.021
64	-0.0397	0.0141
65	-0.0303	0.0001
66	-0.0501	0.0071
67	-0.0501	0.0071
68	-0.0501	0.0071
69	-0.0397	0.0141
70	-0.0093	0.014
71	0.021	0.014
72	0.0513	0.0139
73	0.0816	0.0139
74	0.1119	0.0139
75	0.1224	0.0208
76	0.1423	0.0138
77	0.1621	0.0068
78	0.1621	0.0068
79	0.182	-0.0002
80	0.182	-0.0002
81	0.1621	0.0068
82	0.1621	0.0068
83	0.1423	0.0138
84	0.1423	0.0138
85	0.1516	-0.0002
86	0.1318	0.0069
87	0.1318	0.0069
88	0.1119	0.0139
89	0.1119	0.0139
90	0.1213	-0.0001
91	0.1015	0.0069
92	0.0816	0.0139
93	0.091	-0.0001
94	0.0712	0.0069
95	0.0607	0
96	0.07	-0.014
97	0.0502	-0.007
98	0.0304	0
99	0.0199	-0.007
100	0.0199	-0.007
101	0	0
102	0.0105	0.007
103	0.0304	0
104	0.0607	0
105	0.091	-0.0001
106	0.1213	-0.0001
107	0.1516	-0.0002
108	0.1621	0.0068
109	0.182	-0.0002
110	0.2018	-0.0072
111	0.2123	-0.0002
112	0.2123	-0.0002
113	0.2216	-0.0142
114	0.2216	-0.0142
115	0.2216	-0.0142
116	0.2018	-0.0072
117	0.2018	-0.0072
118	0.1913	-0.0142
119	0.1913	-0.0142
120	0.1808	-0.0212
121	0.1808	-0.0212
122	0.161	-0.0141
123	0.161	-0.0141
124	0.1505	-0.0211
125	0.1505	-0.0211
126	0.1401	-0.0281
127	0.1202	-0.0211
128	0.1097	-0.028
129	0.1191	-0.042
130	0.0993	-0.035
131	0.0888	-0.042
132	0.0689	-0.035
133	0.0585	-0.0419
134	0.0386	-0.0349
135	0.0386	-0.0349
136	0.0386	-0.0349
137	0.0491	-0.028
138	0.0689	-0.035
139	0.0993	-0.035
140	0.1296	-0.0351
141	0.1401	-0.0281
142	0.1797	-0.0421
143	0.1996	-0.0491
144	0.2194	-0.0561
145	0.2194	-0.0561
146	0.2194	-0.0561
147	0.2194	-0.0561
148	0.2194	-0.0561
149	0.2288	-0.0701
150	0.2288	-0.0701
151	0.209	-0.0631
152	0.209	-0.0631
153	0.1891	-0.0561
154	0.1891	-0.0561
155	0.1693	-0.0491
156	0.1786	-0.0631
157	0.1786	-0.0631
158	0.1786	-0.0631
159	0.1588	-0.056
160	0.1682	-0.07
161	0.1483	-0.063
162	0.1483	-0.063
163	0.1285	-0.056
164	0.1086	-0.049
165	0.118	-0.063
166	0.0982	-0.056
167	0.0982	-0.056
168	0.0877	-0.0629
169	0.0877	-0.0629
170	0.0783	-0.049
171	0.0982	-0.056
172	0.1285	-0.056
173	0.139	-0.049
174	0.1693	-0.0491
175	0.1996	-0.0491
176	0.2299	-0.0492
177	0.2498	-0.0562
178	0.2602	-0.0492
179	0.2602	-0.0492
180	0.2602	-0.0492
181	0.2696	-0.0632
182	0.2696	-0.0632
183	0.2696	-0.0632
184	0.2696	-0.0632
185	0.2498	-0.0562
186	0.2498	-0.0562
187	0.2299	-0.0492
188	0.2393	-0.0631
189	0.2194	-0.0561
190	0.2194	-0.0561
191	0.2194	-0.0561
192	0.209	-0.0631
193	0.209	-0.0631
194	0.1891	-0.0561
195	0.1891	-0.0561
196	0.1786	-0.0631
197	0.1786	-0.0631
198	0.1588	-0.056
199	0.1483	-0.063
200	0.1483	-0.063
201	0.1378	-0.07
202	0.118	-0.063
203	0.1086	-0.049
204	0.1285	-0.056
205	0.139	-0.049
206	0.1494	-0.0421
207	0.1797	-0.0421
208	0.2101	-0.0421
209	0.2404	-0.0422
210	0.2707	-0.0422
211	0.2905	-0.0492
212	0.3104	-0.0562
213	0.3302	-0.0633
214	0.3302	-0.0633
215	0.3302	-0.0633
216	0.3302	-0.0633
217	0.3302	-0.0633
218	0.3104	-0.0562
219	0.3104	-0.0562
220	0.3104	-0.0562
221	0.2905	-0.0492
222	0.2905	-0.0492
223	0.2905	-0.0492
224	0.2905	-0.0492
225	0.2707	-0.0422
226	0.2801	-0.0562
227	0.2602	-0.0492
228	0.2404	-0.0422
229	0.2404	-0.0422
230	0.2299	-0.0492
231	0.2299	-0.0492
232	0.2194	-0.0561
233	0.1996	-0.0491
234	0.209	-0.0631
235	0.1891	-0.0561
236	0.1693	-0.0491
237	0.1693	-0.0491
238	0.1797	-0.0421
239	0.1996	-0.0491
240	0.2299	-0.0492
241	0.2404	-0.0422
242	0.2707	-0.0422
243	0.3104	-0.0562
244	0.3209	-0.0493
245	0.3407	-0.0563
246	0.3606	-0.0633
247	0.3606	-0.0633
248	0.3606	-0.0633
249	0.3699	-0.0773
250	0.3699	-0.0773
251	0.3501	-0.0703
252	0.3595	-0.0843
253	0.3396	-0.0772
254	0.3291	-0.0842
255	0.3093	-0.0772
256	0.2894	-0.0702
257	0.279	-0.0772
258	0.279	-0.0772
259	0.2685	-0.0841
260	0.258	-0.0911
261	0.258	-0.0911
262	0.2475	-0.0981
263	0.2371	-0.105
264	0.2068	-0.105
265	0.1963	-0.112
266	0.166	-0.1119
267	0.1649	-0.1329
268	0.1345	-0.1328
269	0.1241	-0.1398
270	0.1136	-0.1468
271	0.1136	-0.1468
272	0.1136	-0.1468
273	0.1241	-0.1398
274	0.1544	-0.1399
275	0.1847	-0.1399
276	0.215	-0.1399
277	0.2349	-0.147
278	0.2453	-0.14
279	0.2652	-0.147
280	0.2746	-0.161
281	0.2746	-0.161
282	0.2839	-0.175
283	0.2734	-0.1819
284	0.2734	-0.1819
285	0.263	-0.1889
286	0.2431	-0.1819
287	0.2525	-0.1959
288	0.2327	-0.1889
289	0.2327	-0.1889
290	0.2128	-0.1818
291	0.2222	-0.1958
292	0.2023	-0.1888
293	0.2023	-0.1888
294	0.1919	-0.1958
295	0.1919	-0.1958
296	0.1919	-0.1958
297	0.1814	-0.2028
298	0.1814	-0.2028
299	0.1709	-0.2097
300	0.1511	-0.2027
301	0.1406	-0.2097
302	0.1406	-0.2097
303	0.1207	-0.2027
304	0.1406	-0.2097
305	0.1312	-0.1957
306	0.1615	-0.1957
307	0.1919	-0.1958
308	0.2222	-0.1958
309	0.2525	-0.1959
310	0.2828	-0.1959
311	0.3027	-0.2029
312	0.3131	-0.196
313	0.3131	-0.196
314	0.3424	-0.2169
315	0.3424	-0.2169
316	0.333	-0.203
317	0.333	-0.203
318	0.333	-0.203
319	0.3131	-0.196
320	0.3131	-0.196
321	0.3131	-0.196
322	0.2933	-0.1889
323	0.3027	-0.2029
324	0.2828	-0.1959
325	0.2828	-0.1959
326	0.2922	-0.2099
327	0.2723	-0.2029
328	0.2723	-0.2029
329	0.2619	-0.2099
330	0.242	-0.2028
331	0.2514	-0.2168
332	0.2315	-0.2098
333	0.2211	-0.2168
334	0.2012	-0.2098
335	0.1908	-0.2167
336	0.1709	-0.2097
337	0.1803	-0.2237
338	0.1908	-0.2167
339	0.2106	-0.2238
340	0.2211	-0.2168
341	0.242	-0.2028
342	0.2922	-0.2099
343	0.3225	-0.2099
344	0.333	-0.203
345	0.3727	-0.217
346	0.3925	-0.224
347	0.403	-0.217
348	0.403	-0.217
349	0.4228	-0.224
350	0.4228	-0.224
351	0.4228	-0.224
352	0.4333	-0.2171
353	0.4333	-0.2171
354	0.4333	-0.2171
355	0.4135	-0.2101
356	0.4135	-0.2101
357	0.3936	-0.203
358	0.403	-0.217
359	0.3831	-0.21
360	0.3727	-0.217
361	0.382	-0.231
362	0.3622	-0.224
363	0.3517	-0.2309
364	0.3412	-0.2379
365	0.3214	-0.2309
366	0.3109	-0.2379
367	0.3005	-0.2448
368	0.29	-0.2518
369	0.2701	-0.2448
370	0.2597	-0.2518
371	0.2597	-0.2518
372	0.2597	-0.2518
373	0.2795	-0.2588
374	0.3005	-0.2448
375	0.3308	-0.2449
376	0.3611	-0.2449
377	0.3914	-0.245
378	0.4311	-0.259
379	0.4509	-0.266
380	0.4614	-0.259
381	0.4708	-0.273
382	0.4708	-0.273
383	0.4708	-0.273
384	0.4802	-0.287
385	0.4802	-0.287
386	0.4603	-0.28
387	0.4498	-0.2869
388	0.4394	-0.2939
389	0.4394	-0.2939
390	0.4289	-0.3009
391	0.4289	-0.3009
392	0.409	-0.2939
393	0.4184	-0.3079
394	0.3986	-0.3008
395	0.3881	-0.3078
396	0.3881	-0.3078
397	0.3776	-0.3148
398	0.3578	-0.3078
399	0.3671	-0.3218
400	0.3473	-0.3147
401	0.3368	-0.3217
402	0.3264	-0.3287
403	0.3264	-0.3287
404	0.3264	-0.3287
405	0.3264	-0.3287
406	0.3368	-0.3217
407	0.3671	-0.3218
408	0.3975	-0.3218
409	0.4278	-0.3218
410	0.4581	-0.3219
411	0.4686	-0.3149
412	0.5083	-0.3289
413	0.5083	-0.3289
414	0.5281	-0.3359
415	0.5187	-0.322
416	0.5386	-0.329
417	0.5187	-0.322
418	0.5187	-0.322
419	0.5187	-0.322
420	0.5187	-0.322
421	0.5187	-0.322
422	0.5187	-0.322
423	0.4989	-0.3149
424	0.4989	-0.3149
425	0.4989	-0.3149
426	0.5083	-0.3289
427	0.5083	-0.3289
428	0.5083	-0.3289
429	0.4884	-0.3219
430	0.4884	-0.3219
431	0.4686	-0.3149
432	0.4686	-0.3149
433	0.478	-0.3289
434	0.4581	-0.3219
435	0.4675	-0.3359
436	0.4476	-0.3288
437	0.4278	-0.3218
438	0.4278	-0.3218
439	0.4476	-0.3288
440	0.4581	-0.3219
441	0.4686	-0.3149
442	0.4989	-0.3149
443	0.5292	-0.315
444	0.5794	-0.322
445	0.5899	-0.3151
446	0.6295	-0.3291
447	0.64	-0.3221
448	0.6505	-0.3151
449	0.6505	-0.3151
450	0.6703	-0.3222
451	0.661	-0.3082
452	0.6808	-0.3152
453	0.6808	-0.3152
454	0.6808	-0.3152
455	0.6714	-0.3012
456	0.6714	-0.3012
457	0.6714	-0.3012
458	0.6714	-0.3012
459	0.6714	-0.3012
460	0.6714	-0.3012
461	0.6422	-0.2802
462	0.6422	-0.2802
463	0.6516	-0.2942
464	0.6318	-0.2872
465	0.6411	-0.3012
466	0.6213	-0.2942
467	0.6014	-0.2871
468	0.6014	-0.2871
469	0.591	-0.2941
470	0.5805	-0.3011
471	0.57	-0.3081
472	0.5502	-0.301
473	0.5595	-0.315
474	0.5595	-0.315
475	0.57	-0.3081
476	0.5899	-0.3151
477	0.6003	-0.3081
478	0.6202	-0.3151
479	0.64	-0.3221
480	0.6599	-0.3291
481	0.6599	-0.3291
482	0.6797	-0.3361
483	0.6797	-0.3361
484	0.6891	-0.3501
485	0.6891	-0.3501
486	0.6891	-0.3501
487	0.6891	-0.3501
488	0.6891	-0.3501
489	0.6786	-0.3571
490	0.6786	-0.3571
491	0.6681	-0.3641
492	0.6483	-0.3571
493	0.6577	-0.371
494	0.6378	-0.364
495	0.6273	-0.371
496	0.6273	-0.371
497	0.6169	-0.378
498	0.6169	-0.378
499	0.6064	-0.3849
500	0.5959	-0.3919
501	0.5854	-0.3989
502	0.575	-0.4058
503	0.5645	-0.4128
504	0.5446	-0.4058
505	0.5435	-0.4268
506	0.5237	-0.4198
507	0.5132	-0.4267
508	0.4934	-0.4197
509	0.5132	-0.4267
510	0.5132	-0.4267
511	0.5331	-0.4337
512	0.5728	-0.4478
513	0.5832	-0.4408
514	0.6031	-0.4478
515	0.6229	-0.4548
516	0.6334	-0.4478
517	0.6532	-0.4548
518	0.6532	-0.4548
519	0.6532	-0.4548
520	0.6532	-0.4548
521	0.6626	-0.4688
522	0.6626	-0.4688
523	0.6428	-0.4618
524	0.6428	-0.4618
525	0.6428	-0.4618
526	0.6229	-0.4548
527	0.6229	-0.4548
528	0.6229	-0.4548
529	0.6229	-0.4548
530	0.6323	-0.4688
531	0.6323	-0.4688
532	0.6124	-0.4618
533	0.6124	-0.4618
534	0.5926	-0.4548
535	0.602	-0.4688
536	0.5821	-0.4617
537	0.5821	-0.4617
538	0.5623	-0.4547
539	0.5717	-0.4687
540	0.5518	-0.4617
541	0.5518	-0.4617
542	0.5717	-0.4687
543	0.5821	-0.4617
544	0.5926	-0.4548
545	0.6323	-0.4688
546	0.6428	-0.4618
547	0.6731	-0.4619
548	0.6929	-0.4689
549	0.7128	-0.4759
550	0.7034	-0.4619
551	0.7232	-0.4689
552	0.7232	-0.4689
553	0.7232	-0.4689
554	0.7337	-0.4619
555	0.7337	-0.4619
556	0.7139	-0.4549
557	0.7139	-0.4549
558	0.7139	-0.4549
559	0.7139	-0.4549
560	0.7139	-0.4549
561	0.7045	-0.4409
562	0.7045	-0.4409
563	0.7045	-0.4409
564	0.694	-0.4479
565	0.694	-0.4479
566	0.694	-0.4479
567	0.694	-0.4479
568	0.6742	-0.4409
569	0.6742	-0.4409
570	0.6742	-0.4409
571	0.6543	-0.4339
572	0.6637	-0.4479
573	0.6439	-0.4409
574	0.6439	-0.4409
575	0.624	-0.4339
576	0.624	-0.4339
577	0.6345	-0.4269
578	0.6543	-0.4339
579	0.6648	-0.4269
580	0.6753	-0.42
581	0.715	-0.434
582	0.7255	-0.427
583	0.7651	-0.441
584	0.7756	-0.4341
585	0.7756	-0.4341
586	0.7955	-0.4411
587	0.7955	-0.4411
588	0.7955	-0.4411
589	0.7861	-0.4271
590	0.7861	-0.4271
591	0.7861	-0.4271
592	0.7861	-0.4271
593	0.7767	-0.4131
594	0.7767	-0.4131
595	0.7767	-0.4131
596	0.7674	-0.3991
597	0.7674	-0.3991
598	0.7872	-0.4061
599	0.7674	-0.3991
600	0.7674	-0.3991
601	0.7767	-0.4131
602	0.7569	-0.4061
603	0.7569	-0.4061
604	0.7569	-0.4061
605	0.737	-0.3991
606	0.7266	-0.4061
607	0.7266	-0.4061
608	0.7161	-0.413
609	0.6962	-0.406
610	0.6858	-0.413
611	0.6858	-0.413
612	0.6659	-0.406
613	0.6858	-0.413
614	0.6858	-0.413
615	0.7056	-0.42
616	0.7161	-0.413
617	0.7359	-0.42
618	0.7558	-0.427
619	0.7651	-0.441
620	0.785	-0.448
621	0.785	-0.448
622	0.785	-0.448
623	0.785	-0.448
624	0.7944	-0.462
625	0.7944	-0.462
626	0.7944	-0.462
627	0.7745	-0.455
628	0.764	-0.462
629	0.764	-0.462
630	0.7442	-0.455
631	0.7536	-0.469
632	0.7337	-0.4619
633	0.7431	-0.4759
634	0.7326	-0.4829
635	0.7128	-0.4759
636	0.7023	-0.4829
637	0.6918	-0.4898
638	0.672	-0.4828
639	0.6814	-0.4968
640	0.6709	-0.5038
641	0.6604	-0.5107
642	0.6499	-0.5177
643	0.6395	-0.5247
644	0.6196	-0.5177
645	0.6091	-0.5246
646	0.5987	-0.5316
647	0.5987	-0.5316
648	0.6185	-0.5386
649	0.629	-0.5317
650	0.6488	-0.5387
651	0.6687	-0.5457
652	0.6885	-0.5527
653	0.6885	-0.5527
654	0.7084	-0.5597
655	0.7177	-0.5737
656	0.7177	-0.5737
657	0.7177	-0.5737
658	0.6979	-0.5667
659	0.7073	-0.5807
660	0.7073	-0.5807
661	0.6874	-0.5736
662	0.6874	-0.5736
663	0.6769	-0.5806
664	0.6769	-0.5806
665	0.6571	-0.5736
666	0.6571	-0.5736
667	0.6665	-0.5876
668	0.6466	-0.5806
669	0.656	-0.5946
670	0.6361	-0.5875
671	0.6163	-0.5805
672	0.6257	-0.5945
673	0.6257	-0.5945
674	0.6058	-0.5875
675	0.6152	-0.6015
676	0.5953	-0.5945
677	0.5953	-0.5945
678	0.5849	-0.6014
679	0.5755	-0.5875
680	0.5953	-0.5945
681	0.6058	-0.5875
682	0.6163	-0.5805
683	0.6361	-0.5875
684	0.656	-0.5946
685	0.6758	-0.6016
686	0.6957	-0.6086
687	0.6957	-0.6086
688	0.7062	-0.6016
689	0.7062	-0.6016
690	0.7062	-0.6016
691	0.726	-0.6086
692	0.7166	-0.5946
693	0.7166	-0.5946
694	0.7166	-0.5946
695	0.7062	-0.6016
696	0.6968	-0.5876
697	0.6968	-0.5876
698	0.6968	-0.5876
699	0.6968	-0.5876
700	0.6968	-0.5876
701	0.6769	-0.5806
702	0.6769	-0.5806
703	0.6769	-0.5806
704	0.6769	-0.5806
705	0.6571	-0.5736
706	0.6665	-0.5876
707	0.6665	-0.5876
708	0.6466	-0.5806
709	0.6466	-0.5806
710	0.6268	-0.5736
711	0.6361	-0.5875
712	0.6163	-0.5805
713	0.6163	-0.5805
714	0.6069	-0.5665
715	0.6268	-0.5736
716	0.6571	-0.5736
717	0.6676	-0.5666
718	0.6979	-0.5667
719	0.7177	-0.5737
720	0.7282	-0.5667
721	0.748	-0.5737
722	0.7679	-0.5807
723	0.7679	-0.5807
724	0.7877	-0.5877
725	0.7877	-0.5877
726	0.7784	-0.5738
727	0.7784	-0.5738
728	0.7784	-0.5738
729	0.7784	-0.5738
730	0.769	-0.5598
731	0.769	-0.5598
732	0.769	-0.5598
733	0.769	-0.5598
734	0.769	-0.5598
735	0.769	-0.5598
736	0.7596	-0.5458
737	0.7398	-0.5388
738	0.7398	-0.5388
739	0.7398	-0.5388
740	0.7398	-0.5388
741	0.7398	-0.5388
742	0.7398	-0.5388
743	0.7398	-0.5388
744	0.7199	-0.5318
745	0.7199	-0.5318
746	0.7001	-0.5248
747	0.7001	-0.5248
748	0.7001	-0.5248
749	0.7001	-0.5248
750	0.7106	-0.5178
751	0.7304	-0.5248
752	0.7409	-0.5178
753	0.7607	-0.5248
754	0.7712	-0.5179
755	0.8109	-0.5319
756	0.8214	-0.5249
757	0.8214	-0.5249
758	0.8412	-0.5319
759	0.8412	-0.5319
760	0.8214	-0.5249
761	0.8307	-0.5389
762	0.8203	-0.5459
763	0.8203	-0.5459
764	0.8004	-0.5389
765	0.8098	-0.5528
766	0.7899	-0.5458
767	0.7899	-0.5458
768	0.7795	-0.5528
769	0.7596	-0.5458
770	0.7492	-0.5528
771	0.7387	-0.5597
772	0.7387	-0.5597
773	0.7282	-0.5667
774	0.7177	-0.5737
775	0.6979	-0.5667
776	0.7073	-0.5807
777	0.6874	-0.5736
778	0.6769	-0.5806
779	0.6665	-0.5876
780	0.6361	-0.5875
781	0.6257	-0.5945
782	0.6152	-0.6015
783	0.6152	-0.6015
784	0.6152	-0.6015
785	0.635	-0.6085
786	0.6549	-0.6155
787	0.6654	-0.6085
788	0.6852	-0.6155
789	0.6946	-0.6295
790	0.7144	-0.6365
791	0.7039	-0.6435
792	0.7133	-0.6575
793	0.6935	-0.6505
794	0.7028	-0.6645
795	0.6924	-0.6714
796	0.6924	-0.6714
797	0.6819	-0.6784
798	0.6714	-0.6854
799	0.6609	-0.6923
800	0.6411	-0.6853
801	0.6411	-0.6853
802	0.6505	-0.6993
803	0.6306	-0.6923
804	0.64	-0.7063
805	0.6201	-0.6993
806	0.6295	-0.7133
807	0.619	-0.7202
808	0.5992	-0.7132
809	0.5992	-0.7132
810	0.5887	-0.7202
811	0.5689	-0.7132
812	0.5584	-0.7202
813	0.5479	-0.7271
814	0.5479	-0.7271
815	0.5281	-0.7201
816	0.5479	-0.7271
817	0.5479	-0.7271
818	0.5678	-0.7341
819	0.5782	-0.7272
820	0.5981	-0.7342
821	0.6179	-0.7412
822	0.6179	-0.7412
823	0.6179	-0.7412
824	0.6273	-0.7552
825	0.6273	-0.7552
826	0.6273	-0.7552
827	0.6367	-0.7692
828	0.6168	-0.7621
829	0.6262	-0.7761
830	0.6064	-0.7691
831	0.6064	-0.7691
832	0.5865	-0.7621
833	0.5959	-0.7761
834	0.576	-0.7691
835	0.576	-0.7691
836	0.5562	-0.7621
837	0.5656	-0.776
838	0.5457	-0.769
839	0.5551	-0.783
840	0.5352	-0.776
841	0.5352	-0.776
842	0.5154	-0.769
843	0.5248	-0.783
844	0.5049	-0.776
845	0.5049	-0.776
846	0.4945	-0.7829
847	0.4945	-0.7829
848	0.4945	-0.7829
849	0.4945	-0.7829
850	0.5049	-0.776
851	0.5154	-0.769
852	0.5457	-0.769
853	0.5656	-0.776
854	0.576	-0.7691
855	0.5959	-0.7761
856	0.6064	-0.7691
857	0.6262	-0.7761
858	0.6262	-0.7761
859	0.6262	-0.7761
860	0.646	-0.7831
861	0.646	-0.7831
862	0.646	-0.7831
863	0.6262	-0.7761
864	0.6262	-0.7761
865	0.6168	-0.7621
866	0.6168	-0.7621
867	0.6168	-0.7621
868	0.6168	-0.7621
869	0.6168	-0.7621
870	0.597	-0.7551
871	0.597	-0.7551
872	0.597	-0.7551
873	0.597	-0.7551
874	0.5771	-0.7481
875	0.5771	-0.7481
876	0.5771	-0.7481
877	0.5771	-0.7481
878	0.5573	-0.7411
879	0.5573	-0.7411
880	0.5468	-0.7481
881	0.5468	-0.7481
882	0.5375	-0.7341
883	0.5375	-0.7341
884	0.5479	-0.7271
885	0.5678	-0.7341
886	0.5782	-0.7272
887	0.5887	-0.7202
888	0.619	-0.7202
889	0.6389	-0.7272
890	0.6494	-0.7203
891	0.6692	-0.7273
892	0.6891	-0.7343
893	0.6891	-0.7343
894	0.6891	-0.7343
895	0.6797	-0.7203
896	0.6995	-0.7273
897	0.6995	-0.7273
898	0.6797	-0.7203
899	0.6797	-0.7203
900	0.6703	-0.7063
901	0.6703	-0.7063
902	0.6703	-0.7063
903	0.6703	-0.7063
904	0.6703	-0.7063
905	0.6703	-0.7063
906	0.6505	-0.6993
907	0.6505	-0.6993
908	0.6505	-0.6993
909	0.6411	-0.6853
910	0.6411	-0.6853
911	0.6411	-0.6853
912	0.6213	-0.6783
913	0.6213	-0.6783
914	0.6213	-0.6783
915	0.6213	-0.6783
916	0.6108	-0.6853
917	0.6014	-0.6713
918	0.6213	-0.6783
919	0.6119	-0.6643
920	0.6422	-0.6644
921	0.6527	-0.6574
922	0.6725	-0.6644
923	0.683	-0.6575
924	0.7227	-0.6715
925	0.7227	-0.6715
926	0.7332	-0.6645
927	0.753	-0.6715
928	0.753	-0.6715
929	0.753	-0.6715
930	0.7635	-0.6645
931	0.7635	-0.6645
932	0.7635	-0.6645
933	0.7541	-0.6506
934	0.7541	-0.6506
935	0.7646	-0.6436
936	0.7646	-0.6436
937	0.7552	-0.6296
938	0.7552	-0.6296
939	0.7552	-0.6296
940	0.7552	-0.6296
941	0.7552	-0.6296
942	0.7458	-0.6156
943	0.7458	-0.6156
944	0.726	-0.6086
945	0.726	-0.6086
946	0.7354	-0.6226
947	0.7155	-0.6156
948	0.7155	-0.6156
949	0.705	-0.6226
950	0.6852	-0.6155
951	0.6654	-0.6085
952	0.6654	-0.6085
953	0.6654	-0.6085
954	0.6654	-0.6085
955	0.6654	-0.6085
956	0.6852	-0.6155
957	0.705	-0.6226
958	0.705	-0.6226
959	0.7343	-0.6436
960	0.7343	-0.6436
961	0.7436	-0.6575
962	0.753	-0.6715
963	0.753	-0.6715
964	0.7425	-0.6785
965	0.7425	-0.6785
966	0.7321	-0.6855
967	0.7216	-0.6924
968	0.7216	-0.6924
969	0.7111	-0.6994
970	0.7006	-0.7064
971	0.6808	-0.6994
972	0.6703	-0.7063
973	0.6797	-0.7203
974	0.6598	-0.7133
975	0.6494	-0.7203
976	0.6389	-0.7272
977	0.6284	-0.7342
978	0.6179	-0.7412
979	0.6179	-0.7412
980	0.6075	-0.7482
981	0.597	-0.7551
982	0.5865	-0.7621
983	0.576	-0.7691
984	0.5656	-0.776
985	0.5551	-0.783
986	0.5446	-0.79
987	0.5248	-0.783
988	0.5341	-0.797
989	0.5248	-0.783
990	0.5446	-0.79
991	0.5645	-0.797
992	0.5843	-0.804
993	0.6042	-0.811
994	0.6042	-0.811
995	0.6042	-0.811
996	0.6135	-0.825
997	0.6135	-0.825
998	0.6135	-0.825
999	0.6229	-0.839
1000	0.6229	-0.839
1001	0.603	-0.832
1002	0.6124	-0.846
1003	0.5926	-0.8389
1004	0.5926	-0.8389
1005	0.5821	-0.8459
1006	0.5821	-0.8459
1007	0.5623	-0.8389
1008	0.5623	-0.8389
1009	0.5623	-0.8389
1010	0.5518	-0.8459
1011	0.5518	-0.8459
1012	0.5518	-0.8459
1013	0.5319	-0.8389
1014	0.5319	-0.8389
1015	0.5413	-0.8528
1016	0.5215	-0.8458
1017	0.5215	-0.8458
1018	0.5016	-0.8388
1019	0.5016	-0.8388
1020	0.5215	-0.8458
1021	0.5215	-0.8458
1022	0.5319	-0.8389
1023	0.5623	-0.8389
1024	0.5727	-0.8319
1025	0.603	-0.832
1026	0.6229	-0.839
1027	0.6334	-0.832
1028	0.6334	-0.832
1029	0.6532	-0.839
1030	0.6532	-0.839
1031	0.6532	-0.839
1032	0.6438	-0.825
1033	0.6438	-0.825
1034	0.6438	-0.825
1035	0.6438	-0.825
1036	0.6438	-0.825
1037	0.6438	-0.825
1038	0.6345	-0.8111
1039	0.6345	-0.8111
1040	0.6345	-0.8111
1041	0.6345	-0.8111
1042	0.6345	-0.8111
1043	0.6345	-0.8111
1044	0.6345	-0.8111
1045	0.6345	-0.8111
1046	0.6146	-0.804
1047	0.6146	-0.804
1048	0.6146	-0.804
1049	0.5948	-0.797
1050	0.5948	-0.797
1051	0.5749	-0.79
1052	0.5749	-0.79
1053	0.5749	-0.79
1054	0.5749	-0.79
1055	0.5749	-0.79
1056	0.5854	-0.7831
1057	0.6157	-0.7831
1058	0.6262	-0.7761
1059	0.6565	-0.7762
1060	0.6764	-0.7832
1061	0.6868	-0.7762
1062	0.7067	-0.7832
1063	0.7067	-0.7832
1064	0.7265	-0.7902
1065	0.7172	-0.7762
1066	0.7172	-0.7762
1067	0.7172	-0.7762
1068	0.7172	-0.7762
1069	0.737	-0.7833
1070	0.7276	-0.7693
1071	0.7276	-0.7693
1072	0.7276	-0.7693
1073	0.7276	-0.7693
1074	0.7276	-0.7693
1075	0.6984	-0.7483
1076	0.6984	-0.7483
1077	0.7183	-0.7553
1078	0.6984	-0.7483
1079	0.6984	-0.7483
1080	0.6984	-0.7483
1081	0.6984	-0.7483
1082	0.6984	-0.7483
1083	0.6891	-0.7343
1084	0.6786	-0.7413
1085	0.6692	-0.7273
1086	0.6692	-0.7273
1087	0.6692	-0.7273
1088	0.6692	-0.7273
1089	0.6598	-0.7133
1090	0.6797	-0.7203
1091	0.6902	-0.7133
1092	0.7006	-0.7064
1093	0.7205	-0.7134
1094	0.7508	-0.7134
1095	0.7613	-0.7065
1096	0.7811	-0.7135
1097	0.7717	-0.6995
1098	0.7916	-0.7065
1099	0.8114	-0.7135
1100	0.8114	-0.7135
1101	0.8219	-0.7065
1102	0.8219	-0.7065
1103	0.8219	-0.7065
1104	0.8125	-0.6926
1105	0.8125	-0.6926
1106	0.8125	-0.6926
1107	0.8032	-0.6786
1108	0.8032	-0.6786
1109	0.8032	-0.6786
1110	0.8032	-0.6786
1111	0.8032	-0.6786
1112	0.7833	-0.6716
1113	0.7833	-0.6716
1114	0.7833	-0.6716
1115	0.7833	-0.6716
1116	0.7635	-0.6645
1117	0.7635	-0.6645
1118	0.753	-0.6715
1119	0.7332	-0.6645
1120	0.7425	-0.6785
1121	0.7227	-0.6715
1122	0.7122	-0.6784
1123	0.6924	-0.6714
1124	0.7017	-0.6854
1125	0.7017	-0.6854
1126	0.7017	-0.6854
1127	0.7017	-0.6854
1128	0.7216	-0.6924
1129	0.7216	-0.6924
1130	0.7414	-0.6994
1131	0.7508	-0.7134
1132	0.7508	-0.7134
1133	0.7602	-0.7274
1134	0.7695	-0.7414
1135	0.7497	-0.7344
1136	0.7591	-0.7484
1137	0.7591	-0.7484
1138	0.7486	-0.7553
1139	0.7381	-0.7623
1140	0.7381	-0.7623
1141	0.7276	-0.7693
1142	0.7078	-0.7623
1143	0.6973	-0.7692
1144	0.6973	-0.7692
1145	0.6868	-0.7762
1146	0.667	-0.7692
1147	0.6764	-0.7832
1148	0.6659	-0.7901
1149	0.6659	-0.7901
1150	0.6554	-0.7971
1151	0.6449	-0.8041
1152	0.6251	-0.7971
1153	0.6146	-0.804
1154	0.6042	-0.811
1155	0.5843	-0.804
1156	0.5937	-0.818
1157	0.5832	-0.825
1158	0.5727	-0.8319
1159	0.5727	-0.8319
1160	0.5529	-0.8249
1161	0.5727	-0.8319
1162	0.5832	-0.825
1163	0.603	-0.832
1164	0.6229	-0.839
1165	0.6334	-0.832
1166	0.6532	-0.839
1167	0.6532	-0.839
1168	0.6532	-0.839
1169	0.6626	-0.853
1170	0.6626	-0.853
1171	0.6521	-0.86
1172	0.6521	-0.86
1173	0.6416	-0.8669
1174	0.6416	-0.8669
1175	0.6218	-0.8599
1176	0.6218	-0.8599
1177	0.6218	-0.8599
1178	0.6218	-0.8599
1179	0.6019	-0.8529
1180	0.6019	-0.8529
1181	0.6019	-0.8529
1182	0.6019	-0.8529
1183	0.5915	-0.8599
1184	0.5915	-0.8599
1185	0.5915	-0.8599
1186	0.5915	-0.8599
1187	0.5915	-0.8599
1188	0.5716	-0.8529
1189	0.5716	-0.8529
1190	0.5612	-0.8599
1191	0.5612	-0.8599
1192	0.5612	-0.8599
1193	0.5319	-0.8389
1194	0.5518	-0.8459
1195	0.5623	-0.8389
1196	0.5821	-0.8459
1197	0.5926	-0.8389
1198	0.603	-0.832
1199	0.6229	-0.839
1200	0.6427	-0.846
1201	0.6626	-0.853
1202	0.6626	-0.853
1203	0.6532	-0.839
1204	0.6532	-0.839
1205	0.6532	-0.839
1206	0.6532	-0.839
1207	0.6532	-0.839
1208	0.6532	-0.839
1209	0.6532	-0.839
1210	0.6532	-0.839
1211	0.6532	-0.839
1212	0.6334	-0.832
1213	0.6334	-0.832
1214	0.624	-0.818
1215	0.6334	-0.832
1216	0.624	-0.818
1217	0.6042	-0.811
1218	0.6042	-0.811
1219	0.6042	-0.811
1220	0.6042	-0.811
1221	0.6042	-0.811
1222	0.6042	-0.811
1223	0.5843	-0.804
1224	0.5843	-0.804
1225	0.5645	-0.797
1226	0.5645	-0.797
1227	0.5645	-0.797
1228	0.5645	-0.797
1229	0.5749	-0.79
1230	0.5854	-0.7831
1231	0.5959	-0.7761
1232	0.6064	-0.7691
1233	0.646	-0.7831
1234	0.6565	-0.7762
1235	0.6764	-0.7832
1236	0.6764	-0.7832
1237	0.6868	-0.7762
1238	0.6868	-0.7762
1239	0.7067	-0.7832
1240	0.7067	-0.7832
1241	0.7067	-0.7832
1242	0.7067	-0.7832
1243	0.7067	-0.7832
1244	0.6868	-0.7762
1245	0.6868	-0.7762
1246	0.6868	-0.7762
1247	0.667	-0.7692
1248	0.6576	-0.7552
1249	0.667	-0.7692
1250	0.667	-0.7692
1251	0.6472	-0.7622
1252	0.6367	-0.7692
1253	0.6367	-0.7692
1254	0.6262	-0.7761
1255	0.6064	-0.7691
1256	0.5959	-0.7761
1257	0.576	-0.7691
1258	0.5854	-0.7831
1259	0.5656	-0.776
1260	0.5551	-0.783
1261	0.5446	-0.79
1262	0.5248	-0.783
1263	0.5341	-0.797
1264	0.5341	-0.797
1265	0.5341	-0.797
1266	0.554	-0.804
1267	0.554	-0.804
1268	0.5738	-0.811
1269	0.5937	-0.818
1270	0.603	-0.832
1271	0.603	-0.832
1272	0.6124	-0.846
1273	0.6124	-0.846
1274	0.6019	-0.8529
1275	0.6019	-0.8529
1276	0.5915	-0.8599
1277	0.6008	-0.8739
1278	0.581	-0.8669
1279	0.5705	-0.8738
1280	0.5705	-0.8738
1281	0.5507	-0.8668
1282	0.56	-0.8808
1283	0.5402	-0.8738
1284	0.5496	-0.8878
1285	0.5297	-0.8808
1286	0.5297	-0.8808
1287	0.5193	-0.8877
1288	0.5193	-0.8877
1289	0.5088	-0.8947
1290	0.5088	-0.8947
1291	0.4983	-0.9017
1292	0.4983	-0.9017
1293	0.4878	-0.9087
1294	0.468	-0.9016
1295	0.4774	-0.9156
1296	0.4575	-0.9086
1297	0.4575	-0.9086
1298	0.4575	-0.9086
1299	0.468	-0.9016
1300	0.4878	-0.9087
1301	0.4983	-0.9017
1302	0.5088	-0.8947
1303	0.5286	-0.9017
1304	0.5485	-0.9087
1305	0.5485	-0.9087
1306	0.5683	-0.9157
1307	0.5683	-0.9157
1308	0.5683	-0.9157
1309	0.5683	-0.9157
1310	0.5683	-0.9157
1311	0.5683	-0.9157
1312	0.5683	-0.9157
1313	0.5683	-0.9157
1314	0.5683	-0.9157
1315	0.5391	-0.8948
1316	0.5391	-0.8948
1317	0.5391	-0.8948
1318	0.5391	-0.8948
1319	0.5391	-0.8948
1320	0.5391	-0.8948
1321	0.5391	-0.8948
1322	0.5193	-0.8877
1323	0.5193	-0.8877
1324	0.5193	-0.8877
1325	0.5193	-0.8877
1326	0.5193	-0.8877
1327	0.4994	-0.8807
1328	0.4994	-0.8807
1329	0.4994	-0.8807
1330	0.4796	-0.8737
1331	0.4796	-0.8737
1332	0.4994	-0.8807
1333	0.5099	-0.8738
1334	0.5402	-0.8738
1335	0.5507	-0.8668
1336	0.581	-0.8669
1337	0.5915	-0.8599
1338	0.6113	-0.8669
1339	0.6019	-0.8529
1340	0.6218	-0.8599
1341	0.6416	-0.8669
1342	0.6323	-0.853
1343	0.6323	-0.853
1344	0.6521	-0.86
1345	0.6521	-0.86
1346	0.6427	-0.846
1347	0.6427	-0.846
1348	0.6427	-0.846
1349	0.6427	-0.846
1350	0.6334	-0.832
1351	0.6334	-0.832
1352	0.6334	-0.832
1353	0.624	-0.818
1354	0.624	-0.818
1355	0.624	-0.818
1356	0.624	-0.818
1357	0.624	-0.818
1358	0.624	-0.818
1359	0.6146	-0.804
1360	0.6146	-0.804
1361	0.5948	-0.797
1362	0.5948	-0.797
1363	0.5948	-0.797
1364	0.5948	-0.797
1365	0.5948	-0.797
1366	0.5948	-0.797
1367	0.5854	-0.7831
1368	0.6251	-0.7971
1369	0.6356	-0.7901
1370	0.646	-0.7831
1371	0.6764	-0.7832
1372	0.6868	-0.7762
1373	0.7067	-0.7832
1374	0.7172	-0.7762
1375	0.737	-0.7833
1376	0.737	-0.7833
1377	0.7475	-0.7763
1378	0.7475	-0.7763
1379	0.7475	-0.7763
1380	0.758	-0.7693
1381	0.758	-0.7693
1382	0.7486	-0.7553
1383	0.7684	-0.7623
1384	0.7591	-0.7484
1385	0.7591	-0.7484
1386	0.7591	-0.7484
1387	0.7497	-0.7344
1388	0.7695	-0.7414
1389	0.7695	-0.7414
1390	0.7695	-0.7414
1391	0.7695	-0.7414
1392	0.7602	-0.7274
1393	0.7602	-0.7274
1394	0.7602	-0.7274
1395	0.7403	-0.7204
1396	0.7403	-0.7204
1397	0.7403	-0.7204
1398	0.7403	-0.7204
1399	0.7403	-0.7204
1400	0.7205	-0.7134
1401	0.7111	-0.6994
1402	0.7309	-0.7064
1403	0.7309	-0.7064
1404	0.7414	-0.6994
1405	0.7519	-0.6925
1406	0.7822	-0.6925
1407	0.7927	-0.6855
1408	0.8125	-0.6926
1409	0.823	-0.6856
1410	0.8429	-0.6926
1411	0.8627	-0.6996
1412	0.8533	-0.6856
1413	0.8732	-0.6926
1414	0.8732	-0.6926
1415	0.893	-0.6996
1416	0.8836	-0.6857
1417	0.8836	-0.6857
1418	0.8836	-0.6857
1419	0.8743	-0.6717
1420	0.8941	-0.6787
1421	0.8743	-0.6717
1422	0.8743	-0.6717
1423	0.8743	-0.6717
1424	0.8743	-0.6717
1425	0.8743	-0.6717
1426	0.8544	-0.6647
1427	0.8638	-0.6786
1428	0.844	-0.6716
1429	0.844	-0.6716
1430	0.844	-0.6716
1431	0.8335	-0.6786
1432	0.8136	-0.6716
1433	0.823	-0.6856
1434	0.8032	-0.6786
1435	0.7927	-0.6855
1436	0.7927	-0.6855
1437	0.7822	-0.6925
1438	0.7822	-0.6925
1439	0.7624	-0.6855
1440	0.7822	-0.6925
1441	0.7822	-0.6925
1442	0.8021	-0.6995
1443	0.8021	-0.6995
1444	0.8219	-0.7065
1445	0.8219	-0.7065
1446	0.8511	-0.7275
1447	0.8511	-0.7275
1448	0.8605	-0.7415
1449	0.8605	-0.7415
1450	0.85	-0.7485
1451	0.8594	-0.7625
1452	0.8395	-0.7555
1453	0.8489	-0.7694
1454	0.8291	-0.7624
1455	0.8291	-0.7624
1456	0.8186	-0.7694
1457	0.8186	-0.7694
1458	0.8081	-0.7764
1459	0.7883	-0.7694
1460	0.7976	-0.7833
1461	0.7778	-0.7763
1462	0.7872	-0.7903
1463	0.7673	-0.7833
1464	0.7767	-0.7973
1465	0.7662	-0.8042
1466	0.7464	-0.7972
1467	0.7557	-0.8112
1468	0.7359	-0.8042
1469	0.7254	-0.8112
1470	0.715	-0.8182
1471	0.715	-0.8182
1472	0.7045	-0.8251
1473	0.694	-0.8321
1474	0.694	-0.8321
1475	0.694	-0.8321
1476	0.694	-0.8321
1477	0.7138	-0.8391
1478	0.7243	-0.8321
1479	0.7243	-0.8321
1480	0.7442	-0.8391
1481	0.7442	-0.8391
1482	0.7442	-0.8391
1483	0.764	-0.8462
1484	0.7734	-0.8601
1485	0.7734	-0.8601
1486	0.7734	-0.8601
1487	0.7629	-0.8671
1488	0.7629	-0.8671
1489	0.7629	-0.8671
1490	0.7431	-0.8601
1491	0.7431	-0.8601
1492	0.7232	-0.8531
1493	0.7326	-0.8671
1494	0.7326	-0.8671
1495	0.7326	-0.8671
1496	0.7127	-0.8601
1497	0.7127	-0.8601
1498	0.7221	-0.874
1499	0.7221	-0.874
1500	0.7023	-0.867
1501	0.7023	-0.867
1502	0.6824	-0.86
1503	0.6918	-0.874
1504	0.6918	-0.874
1505	0.672	-0.867
1506	0.6615	-0.874
1507	0.6615	-0.874
1508	0.6615	-0.874
1509	0.6615	-0.874
1510	0.6615	-0.874
1511	0.672	-0.867
1512	0.6918	-0.874
1513	0.7023	-0.867
1514	0.7127	-0.8601
1515	0.7326	-0.8671
1516	0.7326	-0.8671
1517	0.7431	-0.8601
1518	0.7524	-0.8741
1519	0.7723	-0.8811
1520	0.7723	-0.8811
1521	0.7723	-0.8811
1522	0.7629	-0.8671
1523	0.7629	-0.8671
1524	0.7629	-0.8671
1525	0.7629	-0.8671
1526	0.7629	-0.8671
1527	0.7629	-0.8671
1528	0.7629	-0.8671
1529	0.7629	-0.8671
1530	0.7535	-0.8531
1531	0.7535	-0.8531
1532	0.7337	-0.8461
1533	0.7337	-0.8461
1534	0.7337	-0.8461
1535	0.7337	-0.8461
1536	0.7337	-0.8461
1537	0.7337	-0.8461
1538	0.7337	-0.8461
1539	0.7138	-0.8391
1540	0.7138	-0.8391
1541	0.7138	-0.8391
1542	0.694	-0.8321
1543	0.694	-0.8321
1544	0.694	-0.8321
1545	0.6742	-0.8251
1546	0.6742	-0.8251
1547	0.694	-0.8321
1548	0.7045	-0.8251
1549	0.715	-0.8182
1550	0.7254	-0.8112
1551	0.7453	-0.8182
1552	0.7557	-0.8112
1553	0.7662	-0.8042
1554	0.7861	-0.8113
1555	0.8059	-0.8183
1556	0.8164	-0.8113
1557	0.8164	-0.8113
1558	0.8362	-0.8183
1559	0.8269	-0.8043
1560	0.8269	-0.8043
1561	0.8269	-0.8043
1562	0.8175	-0.7903
1563	0.8175	-0.7903
1564	0.8175	-0.7903
1565	0.8175	-0.7903
1566	0.828	-0.7834
1567	0.828	-0.7834
1568	0.828	-0.7834
1569	0.8186	-0.7694
1570	0.8186	-0.7694
1571	0.8186	-0.7694
1572	0.8092	-0.7554
1573	0.8092	-0.7554
1574	0.8092	-0.7554
1575	0.7999	-0.7414
1576	0.7999	-0.7414
1577	0.7999	-0.7414
1578	0.7999	-0.7414
1579	0.7999	-0.7414
1580	0.7999	-0.7414
1581	0.78	-0.7344
1582	0.78	-0.7344
1583	0.7706	-0.7204
1584	0.7706	-0.7204
1585	0.7706	-0.7204
1586	0.7811	-0.7135
1587	0.7916	-0.7065
1588	0.7916	-0.7065
1589	0.8114	-0.7135
1590	0.8313	-0.7205
1591	0.8313	-0.7205
1592	0.8511	-0.7275
1593	0.8511	-0.7275
1594	0.8605	-0.7415
1595	0.8605	-0.7415
1596	0.8406	-0.7345
1597	0.85	-0.7485
1598	0.85	-0.7485
1599	0.8302	-0.7415
1600	0.8302	-0.7415
1601	0.8197	-0.7484
1602	0.8197	-0.7484
1603	0.8197	-0.7484
1604	0.7999	-0.7414
1605	0.7999	-0.7414
1606	0.8197	-0.7484
1607	0.8197	-0.7484
1608	0.8103	-0.7345
1609	0.8103	-0.7345
1610	0.8103	-0.7345
1611	0.7905	-0.7274
1612	0.7905	-0.7274
1613	0.7905	-0.7274
1614	0.7706	-0.7204
1615	0.78	-0.7344
1616	0.7602	-0.7274
1617	0.7497	-0.7344
1618	0.7194	-0.7343
1619	0.7183	-0.7553
1620	0.7078	-0.7623
1621	0.6879	-0.7552
1622	0.6973	-0.7692
1623	0.6973	-0.7692
1624	0.6973	-0.7692
1625	0.7172	-0.7762
1626	0.7172	-0.7762
1627	0.7265	-0.7902
1628	0.7464	-0.7972
1629	0.7359	-0.8042
1630	0.7359	-0.8042
1631	0.7453	-0.8182
1632	0.7453	-0.8182
1633	0.7546	-0.8322
1634	0.7348	-0.8252
1635	0.7442	-0.8391
1636	0.7243	-0.8321
1637	0.7138	-0.8391
1638	0.7138	-0.8391
1639	0.694	-0.8321
1640	0.7034	-0.8461
1641	0.7034	-0.8461
1642	0.6835	-0.8391
1643	0.6835	-0.8391
1644	0.6929	-0.853
1645	0.6731	-0.846
1646	0.6824	-0.86
1647	0.6626	-0.853
1648	0.6427	-0.846
1649	0.6521	-0.86
1650	0.6323	-0.853
1651	0.6218	-0.8599
1652	0.6312	-0.8739
1653	0.6113	-0.8669
1654	0.6008	-0.8739
1655	0.6008	-0.8739
1656	0.6008	-0.8739
1657	0.5915	-0.8599
1658	0.6113	-0.8669
1659	0.6312	-0.8739
1660	0.6416	-0.8669
1661	0.6416	-0.8669
1662	0.6615	-0.874
1663	0.6615	-0.874
1664	0.6615	-0.874
1665	0.6708	-0.8879
1666	0.6708	-0.8879
1667	0.6708	-0.8879
1668	0.6802	-0.9019
1669	0.6604	-0.8949
1670	0.6604	-0.8949
1671	0.6405	-0.8879
1672	0.6499	-0.9019
1673	0.6499	-0.9019
1674	0.6301	-0.8949
1675	0.6301	-0.8949
1676	0.6196	-0.9018
1677	0.6196	-0.9018
1678	0.6196	-0.9018
1679	0.5997	-0.8948
1680	0.5997	-0.8948
1681	0.6091	-0.9088
1682	0.5893	-0.9018
1683	0.5893	-0.9018
1684	0.5694	-0.8948
1685	0.5788	-0.9088
1686	0.5589	-0.9018
1687	0.5683	-0.9157
1688	0.5485	-0.9087
1689	0.5485	-0.9087
1690	0.5485	-0.9087
1691	0.5391	-0.8948
1692	0.5589	-0.9018
1693	0.5694	-0.8948
1694	0.5799	-0.8878
1695	0.5997	-0.8948
1696	0.6196	-0.9018
1697	0.6394	-0.9089
1698	0.6394	-0.9089
1699	0.6394	-0.9089
1700	0.6394	-0.9089
1701	0.6394	-0.9089
1702	0.6394	-0.9089
1703	0.6488	-0.9228
1704	0.629	-0.9158
1705	0.629	-0.9158
1706	0.629	-0.9158
1707	0.629	-0.9158
1708	0.6091	-0.9088
1709	0.6091	-0.9088
1710	0.6091	-0.9088
1711	0.6091	-0.9088
1712	0.5893	-0.9018
1713	0.5893	-0.9018
1714	0.5893	-0.9018
1715	0.5893	-0.9018
1716	0.5893	-0.9018
1717	0.5893	-0.9018
1718	0.5694	-0.8948
1719	0.5694	-0.8948
1720	0.5694	-0.8948
1721	0.5694	-0.8948
1722	0.5496	-0.8878
1723	0.5496	-0.8878
1724	0.5496	-0.8878
1725	0.5496	-0.8878
1726	0.56	-0.8808
1727	0.5705	-0.8738
1728	0.6008	-0.8739
1729	0.6113	-0.8669
1730	0.6312	-0.8739
1731	0.6416	-0.8669
1732	0.6615	-0.874
1733	0.672	-0.867
1734	0.672	-0.867
1735	0.6918	-0.874
1736	0.6824	-0.86
1737	0.6824	-0.86
1738	0.6824	-0.86
1739	0.6824	-0.86
1740	0.6824	-0.86
1741	0.6731	-0.846
1742	0.6731	-0.846
1743	0.6731	-0.846
1744	0.6731	-0.846
1745	0.6637	-0.8321
1746	0.6637	-0.8321
1747	0.6637	-0.8321
1748	0.6637	-0.8321
1749	0.6637	-0.8321
1750	0.6543	-0.8181
1751	0.6543	-0.8181
1752	0.6543	-0.8181
1753	0.6345	-0.8111
1754	0.6345	-0.8111
1755	0.6345	-0.8111
1756	0.6146	-0.804
1757	0.6146	-0.804
1758	0.6146	-0.804
1759	0.6146	-0.804
1760	0.6345	-0.8111
1761	0.6449	-0.8041
1762	0.6554	-0.7971
1763	0.6659	-0.7901
1764	0.6962	-0.7902
1765	0.7067	-0.7832
1766	0.7265	-0.7902
1767	0.737	-0.7833
1768	0.7569	-0.7903
1769	0.7475	-0.7763
1770	0.7673	-0.7833
1771	0.758	-0.7693
1772	0.7778	-0.7763
1773	0.7778	-0.7763
1774	0.7684	-0.7623
1775	0.7684	-0.7623
1776	0.7789	-0.7554
1777	0.7789	-0.7554
1778	0.7789	-0.7554
1779	0.7695	-0.7414
1780	0.7695	-0.7414
1781	0.7602	-0.7274
1782	0.7602	-0.7274
1783	0.78	-0.7344
1784	0.7706	-0.7204
1785	0.7706	-0.7204
1786	0.7706	-0.7204
1787	0.7613	-0.7065
1788	0.7613	-0.7065
1789	0.7613	-0.7065
1790	0.7519	-0.6925
1791	0.7519	-0.6925
1792	0.7519	-0.6925
1793	0.7519	-0.6925
1794	0.7519	-0.6925
1795	0.7425	-0.6785
1796	0.7425	-0.6785
1797	0.753	-0.6715
1798	0.7635	-0.6645
1799	0.7646	-0.6436
1800	0.8043	-0.6576
1801	0.8147	-0.6506
1802	0.8451	-0.6507
1803	0.8555	-0.6437
1804	0.8555	-0.6437
1805	0.866	-0.6367
1806	0.8859	-0.6438
1807	0.8765	-0.6298
1808	0.8963	-0.6368
1809	0.887	-0.6228
1810	0.9068	-0.6298
1811	0.9068	-0.6298
1812	0.8974	-0.6158
1813	0.8974	-0.6158
1814	0.8881	-0.6018
1815	0.8881	-0.6018
1816	0.8881	-0.6018
1817	0.8881	-0.6018
1818	0.8881	-0.6018
1819	0.8682	-0.5948
1820	0.8682	-0.5948
1821	0.8484	-0.5878
1822	0.8484	-0.5878
1823	0.8484	-0.5878
1824	0.8379	-0.5948
1825	0.8379	-0.5948
1826	0.8274	-0.6018
1827	0.817	-0.6087
1828	0.8065	-0.6157
1829	0.7866	-0.6087
1830	0.796	-0.6227
1831	0.7762	-0.6157
1832	0.7762	-0.6157
1833	0.7563	-0.6087
1834	0.7762	-0.6157
1835	0.7855	-0.6296
1836	0.7855	-0.6296
1837	0.7949	-0.6436
1838	0.7949	-0.6436
1839	0.8043	-0.6576
1840	0.8136	-0.6716
1841	0.823	-0.6856
1842	0.8032	-0.6786
1843	0.8125	-0.6926
1844	0.8125	-0.6926
1845	0.8125	-0.6926
1846	0.8219	-0.7065
1847	0.8021	-0.6995
1848	0.7916	-0.7065
1849	0.7811	-0.7135
1850	0.7905	-0.7274
1851	0.7706	-0.7204
1852	0.7706	-0.7204
1853	0.7706	-0.7204
1854	0.7706	-0.7204
1855	0.7508	-0.7134
1856	0.7602	-0.7274
1857	0.7403	-0.7204
1858	0.7497	-0.7344
1859	0.7298	-0.7274
1860	0.7194	-0.7343
1861	0.7089	-0.7413
1862	0.6891	-0.7343
1863	0.6786	-0.7413
1864	0.6681	-0.7482
1865	0.6775	-0.7622
1866	0.667	-0.7692
1867	0.667	-0.7692
1868	0.667	-0.7692
1869	0.667	-0.7692
1870	0.667	-0.7692
1871	0.6962	-0.7902
1872	0.6962	-0.7902
1873	0.6962	-0.7902
1874	0.6962	-0.7902
1875	0.7056	-0.8042
1876	0.7056	-0.8042
1877	0.715	-0.8182
1878	0.715	-0.8182
1879	0.7243	-0.8321
1880	0.7045	-0.8251
1881	0.7045	-0.8251
1882	0.694	-0.8321
1883	0.694	-0.8321
1884	0.6742	-0.8251
1885	0.6835	-0.8391
1886	0.6637	-0.8321
1887	0.6637	-0.8321
1888	0.6532	-0.839
1889	0.6532	-0.839
1890	0.6626	-0.853
1891	0.6427	-0.846
1892	0.6427	-0.846
1893	0.6427	-0.846
1894	0.6229	-0.839
1895	0.6323	-0.853
1896	0.6124	-0.846
1897	0.6218	-0.8599
1898	0.6019	-0.8529
1899	0.6019	-0.8529
1900	0.5821	-0.8459
1901	0.6019	-0.8529
1902	0.6019	-0.8529
1903	0.6124	-0.846
1904	0.6323	-0.853
1905	0.6521	-0.86
1906	0.6427	-0.846
1907	0.6626	-0.853
1908	0.6626	-0.853
1909	0.6626	-0.853
1910	0.672	-0.867
1911	0.672	-0.867
1912	0.672	-0.867
1913	0.6615	-0.874
1914	0.6615	-0.874
1915	0.651	-0.8809
1916	0.651	-0.8809
1917	0.651	-0.8809
1918	0.6312	-0.8739
1919	0.6312	-0.8739
1920	0.6312	-0.8739
1921	0.6207	-0.8809
1922	0.6207	-0.8809
1923	0.6102	-0.8879
1924	0.6102	-0.8879
1925	0.6196	-0.9018
1926	0.5997	-0.8948
1927	0.5997	-0.8948
1928	0.5997	-0.8948
1929	0.5799	-0.8878
1930	0.5799	-0.8878
1931	0.56	-0.8808
1932	0.5694	-0.8948
1933	0.56	-0.8808
1934	0.5799	-0.8878
1935	0.5904	-0.8808
1936	0.6102	-0.8879
1937	0.6008	-0.8739
1938	0.6207	-0.8809
1939	0.6405	-0.8879
1940	0.6405	-0.8879
1941	0.6405	-0.8879
1942	0.6604	-0.8949
1943	0.6697	-0.9089
1944	0.6499	-0.9019
1945	0.6499	-0.9019
1946	0.6301	-0.8949
1947	0.6394	-0.9089
1948	0.6394	-0.9089
1949	0.6196	-0.9018
1950	0.6196	-0.9018
1951	0.6196	-0.9018
1952	0.5997	-0.8948
1953	0.6091	-0.9088
1954	0.5893	-0.9018
1955	0.5893	-0.9018
1956	0.5986	-0.9158
1957	0.5788	-0.9088
1958	0.5788	-0.9088
1959	0.5788	-0.9088
1960	0.5683	-0.9157
1961	0.5485	-0.9087
1962	0.5485	-0.9087
1963	0.538	-0.9157
1964	0.538	-0.9157
1965	0.538	-0.9157
1966	0.538	-0.9157
1967	0.5485	-0.9087
1968	0.5788	-0.9088
1969	0.5893	-0.9018
1970	0.5997	-0.8948
1971	0.6196	-0.9018
1972	0.6301	-0.8949
1973	0.6499	-0.9019
1974	0.6697	-0.9089
1975	0.6604	-0.8949
1976	0.6604	-0.8949
1977	0.6802	-0.9019
1978	0.6802	-0.9019
1979	0.6708	-0.8879
1980	0.6708	-0.8879
1981	0.6708	-0.8879
1982	0.6615	-0.874
1983	0.6615	-0.874
1984	0.6615	-0.874
1985	0.6615	-0.874
1986	0.6615	-0.874
1987	0.6615	-0.874
1988	0.6615	-0.874
1989	0.6615	-0.874
1990	0.6416	-0.8669
1991	0.6416	-0.8669
1992	0.6416	-0.8669
1993	0.6416	-0.8669
1994	0.6218	-0.8599
1995	0.6218	-0.8599
1996	0.6312	-0.8739
1997	0.6113	-0.8669
1998	0.6113	-0.8669
1999	0.5915	-0.8599
2000	0.5915	-0.8599
2001	0.5915	-0.8599
2002	0.6113	-0.8669
2003	0.6218	-0.8599
2004	0.6323	-0.853
2005	0.6427	-0.846
2006	0.6626	-0.853
2007	0.6731	-0.846
2008	0.6835	-0.8391
2009	0.7034	-0.8461
2010	0.7232	-0.8531
2011	0.7337	-0.8461
2012	0.7535	-0.8531
2013	0.764	-0.8462
2014	0.7745	-0.8392
2015	0.785	-0.8322
2016	0.7756	-0.8182
2017	0.7756	-0.8182
2018	0.7756	-0.8182
2019	0.7756	-0.8182
2020	0.7662	-0.8042
2021	0.7662	-0.8042
2022	0.7662	-0.8042
2023	0.7569	-0.7903
2024	0.7767	-0.7973
2025	0.7767	-0.7973
2026	0.7767	-0.7973
2027	0.7767	-0.7973
2028	0.7569	-0.7903
2029	0.7569	-0.7903
2030	0.7464	-0.7972
2031	0.7265	-0.7902
2032	0.7265	-0.7902
2033	0.7161	-0.7972
2034	0.7161	-0.7972
2035	0.7067	-0.7832
2036	0.7067	-0.7832
2037	0.7172	-0.7762
2038	0.7276	-0.7693
2039	0.758	-0.7693
2040	0.7684	-0.7623
2041	0.7789	-0.7554
2042	0.7987	-0.7624
2043	0.8092	-0.7554
2044	0.8291	-0.7624
2045	0.8489	-0.7694
2046	0.8395	-0.7555
2047	0.85	-0.7485
2048	0.8699	-0.7555
2049	0.8699	-0.7555
[truncated: 39,951 more rows]
