# Supplementary material for: Gender-Related Effect in Oxygenation Dynamics by Using Far-Infrared Intervention with Near-Infrared Spectroscopy Measurement: A Gender Differences Controlled Trial
Source: PLoS One. 2015 Nov 10;10(11):e0135166. doi: 10.1371/journal.pone.0135166 (PMC4640828; doi:10.1371/journal.pone.0135166)
Supplement: S6 File — (XLSX) [file pone.0135166.s006.xlsx]

## Sheet: 工作表1
50	-0.591	-0.09
51	-0.591	-0.09
52	-0.6643	-0.1388
53	-0.7261	-0.1597
54	-0.7261	-0.1597
55	-0.7145	-0.1318
56	-0.7145	-0.1318
57	-0.7145	-0.1318
58	-0.6213	-0.09
59	-0.478	-0.0553
60	-0.3253	-0.0345
61	-0.3253	-0.0345
62	-0.3253	-0.0345
63	-0.3253	-0.0345
64	-0.225	-0.0486
65	-0.225	-0.0486
66	-0.2062	-0.0766
67	-0.2062	-0.0766
68	-0.2387	-0.1184
69	-0.3319	-0.1602
70	-0.3319	-0.1602
71	-0.3319	-0.1602
72	-0.403	-0.1671
73	-0.3926	-0.1602
74	-0.3926	-0.1602
75	-0.3926	-0.1602
76	-0.3496	-0.1113
77	-0.2867	-0.0695
78	-0.2867	-0.0695
79	-0.2867	-0.0695
80	-0.2448	-0.0416
81	-0.2448	-0.0416
82	-0.2448	-0.0416
83	-0.2542	-0.0276
84	-0.274	-0.0206
85	-0.274	-0.0206
86	-0.3137	-0.0066
87	-0.3336	0.0004
88	-0.3336	0.0004
89	-0.3325	0.0214
90	-0.3325	0.0214
91	-0.3115	0.0353
92	-0.3115	0.0353
93	-0.3115	0.0353
94	-0.3104	0.0563
95	-0.3198	0.0703
96	-0.3198	0.0703
97	-0.3198	0.0703
98	-0.3396	0.0773
99	-0.3187	0.0912
100	-0.3187	0.0912
101	-0.3187	0.0912
102	-0.2382	0.0841
103	-0.1379	0.07
104	-0.1379	0.07
105	-0.048	0.0489
106	-0.048	0.0489
107	0.0011	0.0209
108	0.0011	0.0209
109	0	0
110	0	0
111	0	0
112	-0.021	-0.014
113	-0.021	-0.014
114	-0.0607	0.0001
115	-0.0607	0.0001
116	-0.0701	0.014
117	-0.069	0.035
118	-0.069	0.035
119	-0.0888	0.042
120	-0.0888	0.042
121	-0.0993	0.035
122	-0.0993	0.035
123	-0.1202	0.0211
124	-0.1202	0.0211
125	-0.1202	0.0211
126	-0.1715	0.0072
127	-0.2228	-0.0067
128	-0.2228	-0.0067
129	-0.2228	-0.0067
130	-0.2531	-0.0067
131	-0.2531	-0.0067
132	-0.2928	0.0074
133	-0.3126	0.0144
134	-0.3126	0.0144
135	-0.3126	0.0144
136	-0.3126	0.0144
137	-0.3429	0.0144
138	-0.3429	0.0144
139	-0.3429	0.0144
140	-0.3628	0.0214
141	-0.3628	0.0214
142	-0.3628	0.0214
143	-0.3628	0.0214
144	-0.3418	0.0354
145	-0.3418	0.0354
146	-0.2707	0.0423
147	-0.1412	0.0072
148	-0.1412	0.0072
149	-0.1015	-0.0069
150	-0.1015	-0.0069
151	-0.0932	-0.0418
152	-0.0932	-0.0418
153	-0.1153	-0.0767
154	-0.1153	-0.0767
155	-0.1153	-0.0767
156	-0.1654	-0.0696
157	-0.1654	-0.0696
158	-0.1654	-0.0696
159	-0.1654	-0.0696
160	-0.1643	-0.0487
161	-0.1434	-0.0348
162	-0.1434	-0.0348
163	-0.1329	-0.0278
164	-0.1329	-0.0278
165	-0.1329	-0.0278
166	-0.1329	-0.0278
167	-0.1329	-0.0278
168	-0.1632	-0.0277
169	-0.204	-0.0347
170	-0.204	-0.0347
171	-0.204	-0.0347
172	-0.2437	-0.0207
173	-0.2437	-0.0207
174	-0.2834	-0.0066
175	-0.2834	-0.0066
176	-0.2928	0.0074
177	-0.2928	0.0074
178	-0.2928	0.0074
179	-0.2928	0.0074
180	-0.2928	0.0074
181	-0.2928	0.0074
182	-0.2928	0.0074
183	-0.3021	0.0213
184	-0.301	0.0423
185	-0.301	0.0423
186	-0.2415	0.0213
187	-0.1516	0.0002
188	-0.1516	0.0002
189	-0.1516	0.0002
190	-0.0723	-0.0279
191	-0.0535	-0.0558
192	-0.0535	-0.0558
193	-0.0535	-0.0558
194	-0.0535	-0.0558
195	-0.0745	-0.0698
196	-0.1153	-0.0767
197	-0.1153	-0.0767
198	-0.155	-0.0627
199	-0.1445	-0.0557
200	-0.1445	-0.0557
201	-0.1434	-0.0348
202	-0.1434	-0.0348
203	-0.1434	-0.0348
204	-0.1235	-0.0418
205	-0.1434	-0.0348
206	-0.1434	-0.0348
207	-0.1643	-0.0487
208	-0.1643	-0.0487
209	-0.1643	-0.0487
210	-0.2145	-0.0416
211	-0.2553	-0.0486
212	-0.2553	-0.0486
213	-0.2553	-0.0486
214	-0.295	-0.0346
215	-0.3148	-0.0275
216	-0.3148	-0.0275
217	-0.3148	-0.0275
218	-0.3137	-0.0066
219	-0.3137	-0.0066
220	-0.2928	0.0074
221	-0.2928	0.0074
222	-0.2112	0.0212
223	-0.1004	0.0141
224	-0.1004	0.0141
225	-0.1004	0.0141
226	-0.0397	0.014
227	-0.0012	-0.021
228	-0.0012	-0.021
229	-0.0012	-0.021
230	-0.0419	-0.0279
231	-0.0419	-0.0279
232	-0.0827	-0.0348
233	-0.0827	-0.0348
234	-0.1026	-0.0278
235	-0.1026	-0.0278
236	-0.1015	-0.0069
237	-0.1015	-0.0069
238	-0.0712	-0.0069
239	-0.0712	-0.0069
240	-0.0607	0.0001
241	-0.0607	0.0001
242	-0.0502	0.007
243	-0.0805	0.0071
244	-0.0805	0.0071
245	-0.0805	0.0071
246	-0.1307	0.0141
247	-0.161	0.0142
248	-0.161	0.0142
249	-0.161	0.0142
250	-0.1902	0.0352
251	-0.1902	0.0352
252	-0.2101	0.0422
253	-0.2101	0.0422
254	-0.1996	0.0491
255	-0.1996	0.0491
256	-0.1775	0.084
257	-0.1775	0.084
258	-0.1775	0.084
259	-0.0866	0.0839
260	0.0347	0.0838
261	0.0347	0.0838
262	0.1339	0.0487
263	0.1339	0.0487
264	0.1234	0.0417
265	0.1234	0.0417
266	0.1234	0.0417
267	0.1119	0.0138
268	0.0512	0.0139
269	0.0512	0.0139
270	0.0512	0.0139
271	0.0512	0.0139
272	0.0314	0.0209
273	0.0419	0.0279
274	0.0523	0.0348
275	0.043	0.0488
276	0.043	0.0488
277	0.043	0.0488
278	0.0523	0.0348
279	0.022	0.0349
280	0.022	0.0349
281	0.022	0.0349
282	-0.0386	0.035
283	-0.0386	0.035
284	-0.069	0.035
285	-0.069	0.035
286	-0.0982	0.056
287	-0.0982	0.056
288	-0.118	0.063
289	-0.118	0.063
290	-0.118	0.063
291	-0.118	0.063
292	-0.118	0.063
293	-0.118	0.063
294	-0.1169	0.084
295	-0.0656	0.0979
296	-0.0656	0.0979
297	-0.0656	0.0979
298	0.0463	0.1117
299	0.0463	0.1117
300	0.1664	0.0906
301	0.2155	0.0626
302	0.2155	0.0626
303	0.2155	0.0626
304	0.2249	0.0486
305	0.1934	0.0277
306	0.1934	0.0277
307	0.1527	0.0207
308	0.1527	0.0207
309	0.1527	0.0207
310	0.1328	0.0277
311	0.1328	0.0277
312	0.1538	0.0417
313	0.1538	0.0417
314	0.1444	0.0557
315	0.1549	0.0626
316	0.1549	0.0626
317	0.1549	0.0626
318	0.1245	0.0627
319	0.1245	0.0627
320	0.0837	0.0557
321	0.0837	0.0557
322	0.0534	0.0558
323	0.0534	0.0558
324	0.0534	0.0558
325	0.0534	0.0558
326	0.0137	0.0698
327	0.0137	0.0698
328	0.0044	0.0838
329	0.0044	0.0838
330	0.0148	0.0908
331	0.0148	0.0908
332	-0.0144	0.1118
333	-0.0144	0.1118
334	-0.0039	0.1187
335	0.0077	0.1467
336	0.0077	0.1467
337	0.0077	0.1467
338	0.1185	0.1395
339	0.1185	0.1395
340	0.2188	0.1254
341	0.2188	0.1254
342	0.2982	0.0974
343	0.3169	0.0694
344	0.3169	0.0694
345	0.3169	0.0694
346	0.2761	0.0625
347	0.2761	0.0625
348	0.2353	0.0555
349	0.2155	0.0626
350	0.2155	0.0626
351	0.2155	0.0626
352	0.2166	0.0835
353	0.2166	0.0835
354	0.2469	0.0835
355	0.2469	0.0835
356	0.2574	0.0904
357	0.2376	0.0975
358	0.2376	0.0975
359	0.2376	0.0975
360	0.2166	0.0835
361	0.1758	0.0766
362	0.1758	0.0766
363	0.1758	0.0766
364	0.1256	0.0836
365	0.1256	0.0836
366	0.086	0.0977
367	0.086	0.0977
368	0.086	0.0977
369	0.086	0.0977
370	0.0766	0.1116
371	0.0672	0.1256
372	0.0672	0.1256
373	0.0672	0.1256
374	0.0672	0.1256
375	0.0672	0.1256
376	0.038	0.1466
377	0.038	0.1466
378	0.0485	0.1536
379	0.1196	0.1605
380	0.1196	0.1605
381	0.2105	0.1604
382	0.2105	0.1604
383	0.2105	0.1604
384	0.3098	0.1253
385	0.3098	0.1253
386	0.3379	0.0834
387	0.3379	0.0834
388	0.3065	0.0624
389	0.2447	0.0416
390	0.2447	0.0416
391	0.2447	0.0416
392	0.2238	0.0276
393	0.2144	0.0416
394	0.2144	0.0416
395	0.2144	0.0416
396	0.2249	0.0486
397	0.2155	0.0626
398	0.2155	0.0626
399	0.2155	0.0626
400	0.2249	0.0486
401	0.1747	0.0556
402	0.1747	0.0556
403	0.1747	0.0556
404	0.1433	0.0347
405	0.1433	0.0347
406	0.0931	0.0418
407	0.0931	0.0418
408	0.0628	0.0418
409	0.0628	0.0418
410	0.0325	0.0418
411	-0.0083	0.0349
412	-0.0083	0.0349
413	-0.0386	0.035
414	-0.0386	0.035
415	-0.0386	0.035
416	-0.0386	0.035
417	-0.0386	0.035
418	-0.0375	0.0559
419	-0.0375	0.0559
420	0.0137	0.0698
421	0.0137	0.0698
422	0.0953	0.0837
423	0.0953	0.0837
424	0.1957	0.0696
425	0.1957	0.0696
426	0.2447	0.0416
427	0.2447	0.0416
428	0.2331	0.0136
429	0.2331	0.0136
430	0.1725	0.0137
431	0.162	0.0067
432	0.162	0.0067
433	0.162	0.0067
434	0.1538	0.0417
435	0.1538	0.0417
436	0.1747	0.0556
437	0.1747	0.0556
438	0.1747	0.0556
439	0.1852	0.0626
440	0.1957	0.0696
441	0.1957	0.0696
442	0.1852	0.0626
443	0.1852	0.0626
444	0.1339	0.0487
445	0.0733	0.0488
446	0.0733	0.0488
447	0.0733	0.0488
448	0.0336	0.0628
449	0.0336	0.0628
450	0.0336	0.0628
451	0.0336	0.0628
452	0.0148	0.0908
453	0.0148	0.0908
454	0.0055	0.1047
455	0.0055	0.1047
456	0.0055	0.1047
457	0.0055	0.1047
458	0.0055	0.1047
459	-0.0144	0.1118
460	-0.0342	0.1188
461	-0.0436	0.1328
462	-0.0436	0.1328
463	-0.0436	0.1328
464	0.0171	0.1327
465	0.0171	0.1327
466	0.1174	0.1186
467	0.1174	0.1186
468	0.1174	0.1186
469	0.1174	0.1186
470	0.2271	0.0905
471	0.2657	0.0555
472	0.2635	0.0136
473	0.2635	0.0136
474	0.1923	0.0067
475	0.1515	-0.0002
476	0.1515	-0.0002
477	0.1422	0.0138
478	0.1422	0.0138
479	0.1422	0.0138
480	0.1527	0.0207
481	0.1527	0.0207
482	0.1527	0.0207
483	0.1631	0.0277
484	0.1631	0.0277
485	0.1631	0.0277
486	0.1736	0.0347
487	0.1433	0.0347
488	0.1223	0.0208
489	0.1223	0.0208
490	0.0523	0.0348
491	0.0523	0.0348
492	0.022	0.0349
493	0.022	0.0349
494	0.0022	0.0419
495	-0.0177	0.0489
496	-0.0177	0.0489
497	-0.0177	0.0489
498	-0.0271	0.0629
499	-0.0271	0.0629
500	-0.0271	0.0629
501	-0.0271	0.0629
502	-0.0667	0.0769
503	-0.0667	0.0769
504	-0.0772	0.0699
505	-0.0772	0.0699
506	-0.0563	0.0839
507	-0.0563	0.0839
508	-0.005	0.0978
509	-0.005	0.0978
510	0.1058	0.0906
511	0.1058	0.0906
512	0.1957	0.0696
513	0.1957	0.0696
514	0.2447	0.0416
515	0.2436	0.0206
516	0.2436	0.0206
517	0.2436	0.0206
518	0.2122	-0.0003
519	0.162	0.0067
520	0.162	0.0067
521	0.1527	0.0207
522	0.1527	0.0207
523	0.1538	0.0417
524	0.1538	0.0417
525	0.1642	0.0487
526	0.1642	0.0487
527	0.1642	0.0487
528	0.1736	0.0347
529	0.1433	0.0347
530	0.1433	0.0347
531	0.0931	0.0418
532	0.0931	0.0418
533	0.0931	0.0418
534	0.0523	0.0348
535	0.0523	0.0348
536	0.022	0.0349
537	0.022	0.0349
538	-0.0177	0.0489
539	-0.0177	0.0489
540	-0.0177	0.0489
541	-0.0177	0.0489
542	-0.048	0.0489
543	-0.048	0.0489
544	-0.0877	0.063
545	-0.0877	0.063
546	-0.0877	0.063
547	-0.0888	0.042
548	-0.1191	0.042
549	-0.1191	0.042
550	-0.1285	0.056
551	-0.1285	0.056
552	-0.0971	0.0769
553	-0.0971	0.0769
554	-0.0971	0.0769
555	-0.0072	0.0559
556	0.092	0.0208
557	0.092	0.0208
558	0.1212	-0.0002
559	0.1097	-0.0281
560	0.1097	-0.0281
561	0.1097	-0.0281
562	0.0584	-0.042
563	0.0584	-0.042
564	0.0176	-0.0489
565	0.0281	-0.042
566	0.0281	-0.042
567	0.0281	-0.042
568	0.0292	-0.021
569	0.049	-0.028
570	0.049	-0.028
571	0.049	-0.028
572	0.0396	-0.014
573	0.0396	-0.014
574	0.0292	-0.021
575	-0.0116	-0.0279
576	-0.0116	-0.0279
577	-0.0116	-0.0279
578	-0.0116	-0.0279
579	-0.0618	-0.0209
580	-0.1015	-0.0069
581	-0.1015	-0.0069
582	-0.1015	-0.0069
583	-0.1015	-0.0069
584	-0.1108	0.0071
585	-0.1108	0.0071
586	-0.1202	0.0211
587	-0.1097	0.0281
588	-0.1097	0.0281
589	-0.1097	0.0281
590	-0.1086	0.049
591	-0.048	0.0489
592	-0.048	0.0489
593	-0.048	0.0489
594	0.0325	0.0418
595	0.1223	0.0208
596	0.1223	0.0208
597	0.1223	0.0208
598	0.1504	-0.0212
599	0.1504	-0.0212
600	0.119	-0.0421
601	0.0678	-0.056
602	0.0678	-0.056
603	0.0678	-0.056
604	0.0281	-0.042
605	0.0292	-0.021
606	0.0292	-0.021
607	0.0292	-0.021
608	0.0292	-0.021
609	0.0385	-0.035
610	0.0385	-0.035
611	0.0385	-0.035
612	0.0385	-0.035
613	0.049	-0.028
614	0.049	-0.028
615	0.0396	-0.014
616	0.0396	-0.014
617	0.0396	-0.014
618	0.0209	0.0139
619	0.022	0.0349
620	0.022	0.0349
621	-0.0072	0.0559
622	-0.0072	0.0559
623	-0.0469	0.0699
624	-0.0469	0.0699
625	-0.0469	0.0699
626	-0.0667	0.0769
627	-0.0772	0.0699
628	-0.0772	0.0699
629	-0.0772	0.0699
630	-0.0982	0.056
631	-0.1285	0.056
632	-0.1285	0.056
633	-0.0971	0.0769
634	-0.0971	0.0769
635	-0.0971	0.0769
636	-0.005	0.0978
637	0.1361	0.0906
638	0.1361	0.0906
639	0.1361	0.0906
640	0.2552	0.0485
641	0.2552	0.0485
642	0.2552	0.0485
643	0.2739	0.0206
644	0.2623	-0.0074
645	0.2216	-0.0143
646	0.2216	-0.0143
647	0.2122	-0.0003
648	0.2122	-0.0003
649	0.2436	0.0206
650	0.2436	0.0206
651	0.275	0.0415
652	0.275	0.0415
653	0.275	0.0415
654	0.2657	0.0555
655	0.2458	0.0625
656	0.2458	0.0625
657	0.226	0.0695
658	0.226	0.0695
659	0.226	0.0695
660	0.2061	0.0765
661	0.1863	0.0836
662	0.1863	0.0836
663	0.1675	0.1115
664	0.1675	0.1115
665	0.178	0.1185
666	0.178	0.1185
667	0.1686	0.1325
668	0.1686	0.1325
669	0.1686	0.1325
670	0.1686	0.1325
671	0.1686	0.1325
672	0.1488	0.1395
673	0.1488	0.1395
674	0.129	0.1465
675	0.129	0.1465
676	0.0986	0.1465
677	0.0986	0.1465
678	0.0986	0.1465
679	0.1593	0.1465
680	0.1593	0.1465
681	0.1593	0.1465
682	0.2596	0.1324
683	0.2596	0.1324
684	0.3693	0.1043
685	0.3693	0.1043
686	0.3985	0.0833
687	0.3985	0.0833
688	0.3974	0.0623
689	0.3974	0.0623
690	0.3671	0.0624
691	0.3671	0.0624
692	0.3472	0.0694
693	0.3484	0.0903
694	0.3484	0.0903
695	0.3484	0.0903
696	0.3798	0.1112
697	0.3903	0.1182
698	0.3903	0.1182
699	0.3903	0.1182
700	0.3903	0.1182
701	0.3903	0.1182
702	0.3798	0.1112
703	0.3798	0.1112
704	0.3296	0.1183
705	0.3296	0.1183
706	0.2888	0.1114
707	0.2888	0.1114
708	0.2585	0.1114
709	0.2188	0.1254
710	0.2188	0.1254
711	0.2188	0.1254
712	0.2188	0.1254
713	0.2188	0.1254
714	0.199	0.1324
715	0.199	0.1324
716	0.1686	0.1325
717	0.1686	0.1325
718	0.1383	0.1325
719	0.1383	0.1325
720	0.108	0.1326
721	0.108	0.1326
722	0.0882	0.1396
723	0.0882	0.1396
724	0.0986	0.1465
725	0.1686	0.1325
726	0.1686	0.1325
727	0.1686	0.1325
728	0.269	0.1184
729	0.269	0.1184
730	0.3484	0.0903
731	0.3484	0.0903
732	0.3776	0.0693
733	0.3776	0.0693
734	0.3472	0.0694
735	0.3472	0.0694
736	0.3368	0.0624
737	0.3368	0.0624
738	0.3379	0.0834
739	0.3379	0.0834
740	0.3495	0.1113
741	0.3495	0.1113
742	0.3599	0.1182
743	0.3599	0.1182
744	0.3704	0.1252
745	0.3704	0.1252
746	0.3798	0.1112
747	0.3798	0.1112
748	0.3495	0.1113
749	0.3495	0.1113
750	0.3087	0.1043
751	0.2679	0.0974
752	0.2679	0.0974
753	0.2679	0.0974
754	0.2282	0.1114
755	0.2282	0.1114
756	0.2188	0.1254
757	0.2188	0.1254
758	0.2188	0.1254
759	0.2199	0.1464
760	0.2304	0.1533
761	0.2304	0.1533
762	0.2105	0.1604
763	0.2105	0.1604
764	0.2012	0.1743
765	0.2012	0.1743
766	0.2116	0.1813
767	0.2116	0.1813
768	0.2723	0.1812
769	0.2723	0.1812
770	0.2723	0.1812
771	0.3621	0.1602
772	0.431	0.1251
773	0.431	0.1251
774	0.4404	0.1112
775	0.4404	0.1112
776	0.4195	0.0972
777	0.4195	0.0972
778	0.3891	0.0973
779	0.3891	0.0973
780	0.3798	0.1112
781	0.3798	0.1112
782	0.3798	0.1112
783	0.3798	0.1112
784	0.3914	0.1392
785	0.4018	0.1461
786	0.4123	0.1531
787	0.4123	0.1531
788	0.3925	0.1601
789	0.382	0.1531
790	0.382	0.1531
791	0.3412	0.1462
792	0.3412	0.1462
793	0.3109	0.1463
794	0.3109	0.1463
795	0.3109	0.1463
796	0.2712	0.1603
797	0.2712	0.1603
798	0.2513	0.1673
799	0.2513	0.1673
800	0.242	0.1813
801	0.242	0.1813
802	0.242	0.1813
803	0.2524	0.1882
804	0.2232	0.2092
805	0.2034	0.2162
806	0.2034	0.2162
807	0.2034	0.2162
808	0.1731	0.2163
809	0.1731	0.2163
810	0.1532	0.2233
811	0.1532	0.2233
812	0.2045	0.2372
813	0.2045	0.2372
814	0.3153	0.2301
815	0.3153	0.2301
816	0.4355	0.209
817	0.4355	0.209
818	0.5148	0.1809
819	0.5148	0.1809
820	0.5441	0.1599
821	0.5441	0.1599
822	0.5441	0.1599
823	0.5441	0.1599
824	0.5441	0.1599
825	0.5242	0.1669
826	0.5253	0.1879
827	0.5253	0.1879
828	0.5358	0.1948
829	0.5358	0.1948
830	0.5253	0.1879
831	0.5253	0.1879
832	0.5044	0.1739
833	0.5044	0.1739
834	0.5044	0.1739
835	0.4636	0.167
836	0.4217	0.1391
837	0.361	0.1392
838	0.361	0.1392
839	0.3213	0.1532
840	0.3213	0.1532
841	0.3213	0.1532
842	0.2921	0.1742
843	0.2921	0.1742
844	0.2828	0.1882
845	0.2734	0.2022
846	0.2734	0.2022
847	0.2734	0.2022
848	0.2535	0.2092
849	0.2535	0.2092
850	0.2326	0.1953
851	0.1918	0.1883
852	0.1918	0.1883
853	0.1918	0.1883
854	0.1813	0.1813
855	0.1813	0.1813
856	0.1626	0.2093
857	0.1626	0.2093
858	0.2034	0.2162
859	0.2034	0.2162
860	0.2839	0.2092
861	0.2839	0.2092
862	0.3831	0.1741
863	0.3831	0.1741
864	0.4321	0.1461
865	0.4321	0.1461
866	0.4321	0.1461
867	0.4509	0.1181
868	0.4206	0.1182
869	0.4206	0.1182
870	0.4101	0.1112
871	0.3914	0.1392
872	0.3914	0.1392
873	0.3914	0.1392
874	0.4112	0.1321
875	0.4112	0.1321
876	0.4018	0.1461
877	0.4018	0.1461
878	0.4018	0.1461
879	0.4018	0.1461
880	0.4018	0.1461
881	0.4018	0.1461
882	0.3914	0.1392
883	0.3914	0.1392
884	0.3715	0.1462
885	0.3715	0.1462
886	0.3225	0.1742
887	0.3131	0.1882
888	0.3131	0.1882
889	0.3131	0.1882
890	0.3037	0.2021
891	0.3037	0.2021
892	0.2839	0.2092
893	0.264	0.2162
894	0.264	0.2162
895	0.264	0.2162
896	0.2547	0.2301
897	0.2547	0.2301
898	0.2547	0.2301
899	0.285	0.2301
900	0.3655	0.223
901	0.3655	0.223
902	0.4553	0.2019
903	0.4553	0.2019
904	0.5044	0.1739
905	0.5044	0.1739
906	0.5126	0.139
907	0.5126	0.139
908	0.4718	0.1321
909	0.4718	0.1321
910	0.431	0.1251
911	0.431	0.1251
912	0.4217	0.1391
913	0.4217	0.1391
914	0.4134	0.1741
915	0.4134	0.1741
916	0.4239	0.181
917	0.4239	0.181
918	0.4239	0.181
919	0.4239	0.181
920	0.4437	0.174
921	0.4437	0.174
922	0.404	0.188
923	0.404	0.188
924	0.3831	0.1741
925	0.3329	0.1811
926	0.3329	0.1811
927	0.3131	0.1882
928	0.3131	0.1882
929	0.3131	0.1882
930	0.3131	0.1882
931	0.2839	0.2092
932	0.2839	0.2092
933	0.2839	0.2092
934	0.2839	0.2092
935	0.2547	0.2301
936	0.2547	0.2301
937	0.2547	0.2301
938	0.2547	0.2301
939	0.2547	0.2301
940	0.2254	0.2511
941	0.2254	0.2511
942	0.2662	0.2581
943	0.3373	0.265
944	0.3373	0.265
945	0.3373	0.265
946	0.447	0.2369
947	0.447	0.2369
948	0.5463	0.2018
949	0.5463	0.2018
950	0.5755	0.1808
951	0.565	0.1739
952	0.565	0.1739
953	0.565	0.1739
954	0.5347	0.1739
955	0.5347	0.1739
956	0.5347	0.1739
957	0.5347	0.1739
958	0.5347	0.1739
959	0.5358	0.1948
960	0.5463	0.2018
961	0.5567	0.2088
962	0.5567	0.2088
963	0.5567	0.2088
964	0.5474	0.2228
965	0.5275	0.2298
966	0.5275	0.2298
967	0.4867	0.2229
968	0.4867	0.2229
969	0.4867	0.2229
970	0.4459	0.2159
971	0.4062	0.2299
972	0.4062	0.2299
973	0.4062	0.2299
974	0.3666	0.244
975	0.3666	0.244
976	0.3467	0.251
977	0.3467	0.251
978	0.3467	0.251
979	0.3467	0.251
980	0.3269	0.258
981	0.307	0.265
982	0.2767	0.265
983	0.2767	0.265
984	0.2558	0.2511
985	0.2359	0.2581
986	0.2359	0.2581
987	0.2464	0.2651
988	0.2464	0.2651
989	0.2965	0.258
990	0.2965	0.258
991	0.2965	0.258
992	0.4051	0.209
993	0.4051	0.209
994	0.4051	0.209
995	0.4542	0.181
996	0.4823	0.139
997	0.4823	0.139
998	0.4415	0.1321
999	0.4007	0.1252
1000	0.4007	0.1252
1001	0.4007	0.1252
1002	0.3809	0.1322
1003	0.3809	0.1322
1004	0.3914	0.1392
1005	0.3914	0.1392
1006	0.3925	0.1601
1007	0.3925	0.1601
1008	0.3925	0.1601
1009	0.3925	0.1601
1010	0.3925	0.1601
1011	0.3925	0.1601
1012	0.382	0.1531
1013	0.382	0.1531
1014	0.382	0.1531
1015	0.382	0.1531
1016	0.3318	0.1602
1017	0.3015	0.1602
1018	0.2723	0.1812
1019	0.2723	0.1812
1020	0.2828	0.1882
1021	0.2828	0.1882
1022	0.2839	0.2092
1023	0.2839	0.2092
1024	0.2745	0.2231
1025	0.2547	0.2301
1026	0.2547	0.2301
1027	0.2547	0.2301
1028	0.2547	0.2301
1029	0.2547	0.2301
1030	0.2651	0.2371
1031	0.2651	0.2371
1032	0.3153	0.2301
1033	0.3153	0.2301
1034	0.3853	0.216
1035	0.3853	0.216
1036	0.4542	0.181
1037	0.4542	0.181
1038	0.4729	0.153
1039	0.4729	0.153
1040	0.452	0.1391
1041	0.4123	0.1531
1042	0.4123	0.1531
1043	0.4123	0.1531
1044	0.4029	0.1671
1045	0.4239	0.181
1046	0.4239	0.181
1047	0.4239	0.181
1048	0.425	0.202
1049	0.425	0.202
1050	0.4145	0.195
1051	0.4145	0.195
1052	0.4145	0.195
1053	0.4145	0.195
1054	0.4145	0.195
1055	0.3842	0.195
1056	0.3539	0.1951
1057	0.3539	0.1951
1058	0.3539	0.1951
1059	0.3236	0.1951
1060	0.2839	0.2092
1061	0.2839	0.2092
1062	0.264	0.2162
1063	0.264	0.2162
1064	0.2348	0.2372
1065	0.2348	0.2372
1066	0.2348	0.2372
1067	0.2348	0.2372
1068	0.2348	0.2372
1069	0.215	0.2442
1070	0.215	0.2442
1071	0.215	0.2442
1072	0.2161	0.2651
1073	0.2161	0.2651
1074	0.2569	0.2721
1075	0.2569	0.2721
1076	0.3373	0.265
1077	0.3373	0.265
1078	0.4366	0.2299
1079	0.4366	0.2299
1080	0.495	0.1879
1081	0.495	0.1879
1082	0.4939	0.167
1083	0.4928	0.146
1084	0.4928	0.146
1085	0.4928	0.146
1086	0.4531	0.16
1087	0.4531	0.16
1088	0.4542	0.181
1089	0.4542	0.181
1090	0.4751	0.1949
1091	0.4751	0.1949
1092	0.4658	0.2089
1093	0.4658	0.2089
1094	0.4658	0.2089
1095	0.4658	0.2089
1096	0.4658	0.2089
1097	0.4658	0.2089
1098	0.4355	0.209
1099	0.4355	0.209
1100	0.4051	0.209
1101	0.4051	0.209
1102	0.355	0.216
1103	0.355	0.216
1104	0.355	0.216
1105	0.355	0.216
1106	0.3153	0.2301
1107	0.3153	0.2301
1108	0.2954	0.2371
1109	0.2954	0.2371
1110	0.2861	0.2511
1111	0.2861	0.2511
1112	0.2861	0.2511
1113	0.2558	0.2511
1114	0.2558	0.2511
1115	0.2359	0.2581
1116	0.2359	0.2581
1117	0.2359	0.2581
1118	0.237	0.2791
1119	0.3373	0.265
1120	0.3373	0.265
1121	0.3373	0.265
1122	0.447	0.2369
1123	0.5264	0.2088
1124	0.5264	0.2088
1125	0.5264	0.2088
1126	0.5755	0.1808
1127	0.5755	0.1808
1128	0.5545	0.1669
1129	0.5545	0.1669
1130	0.5033	0.153
1131	0.5033	0.153
1132	0.4426	0.1531
1133	0.4426	0.1531
1134	0.4123	0.1531
1135	0.4123	0.1531
1136	0.4123	0.1531
1137	0.382	0.1531
1138	0.3307	0.1392
1139	0.3307	0.1392
1140	0.2679	0.0974
1141	0.2679	0.0974
1142	0.1549	0.0626
1143	0.1549	0.0626
1144	0.1025	0.0278
1145	0.1025	0.0278
1146	0.0826	0.0348
1147	0.0826	0.0348
1148	0.1047	0.0697
1149	0.1047	0.0697
1150	0.1267	0.1046
1151	0.1383	0.1325
1152	0.1383	0.1325
1153	0.1383	0.1325
1154	0.1394	0.1535
1155	0.1394	0.1535
1156	0.1394	0.1535
1157	0.1394	0.1535
1158	0.0986	0.1465
1159	0.0986	0.1465
1160	0.0589	0.1606
1161	0.0589	0.1606
1162	0.0799	0.1745
1163	0.0799	0.1745
1164	0.1709	0.1744
1165	0.3004	0.1393
1166	0.3004	0.1393
1167	0.3004	0.1393
1168	0.3599	0.1182
1169	0.3599	0.1182
1170	0.3588	0.0973
1171	0.3588	0.0973
1172	0.3169	0.0694
1173	0.3169	0.0694
1174	0.2458	0.0625
1175	0.2458	0.0625
1176	0.205	0.0556
1177	0.205	0.0556
1178	0.1945	0.0486
1179	0.1945	0.0486
1180	0.1945	0.0486
1181	0.1945	0.0486
1182	0.2249	0.0486
1183	0.2249	0.0486
1184	0.2353	0.0555
1185	0.2353	0.0555
1186	0.1957	0.0696
1187	0.1455	0.0766
1188	0.1455	0.0766
1189	0.1455	0.0766
1190	0.086	0.0977
1191	0.086	0.0977
1192	0.0661	0.1047
1193	0.0567	0.1186
1194	0.0567	0.1186
1195	0.0567	0.1186
1196	0.0578	0.1396
1197	0.0578	0.1396
1198	0.0788	0.1535
1199	0.0788	0.1535
1200	0.1102	0.1745
1201	0.1102	0.1745
1202	0.2128	0.2023
1203	0.2128	0.2023
1204	0.355	0.216
1205	0.4763	0.2159
1206	0.4763	0.2159
1207	0.4763	0.2159
1208	0.5556	0.1878
1209	0.5556	0.1878
1210	0.5336	0.1529
1211	0.4625	0.1461
1212	0.4625	0.1461
1213	0.4625	0.1461
1214	0.4625	0.1461
1215	0.4112	0.1321
1216	0.3715	0.1462
1217	0.3715	0.1462
1218	0.3621	0.1602
1219	0.3621	0.1602
1220	0.3621	0.1602
1221	0.3621	0.1602
1222	0.3621	0.1602
1223	0.3621	0.1602
1224	0.3621	0.1602
1225	0.3412	0.1462
1226	0.3004	0.1393
1227	0.3004	0.1393
1228	0.2491	0.1254
1229	0.2491	0.1254
1230	0.178	0.1185
1231	0.178	0.1185
1232	0.1372	0.1116
1233	0.1372	0.1116
1234	0.108	0.1326
1235	0.108	0.1326
1236	0.0986	0.1465
1237	0.0986	0.1465
1238	0.0986	0.1465
1239	0.0986	0.1465
1240	0.0997	0.1675
1241	0.1008	0.1884
1242	0.1427	0.2163
1243	0.1427	0.2163
1244	0.2442	0.2232
1245	0.2442	0.2232
1246	0.3947	0.202
1247	0.3947	0.202
1248	0.4939	0.167
1249	0.5325	0.132
1250	0.5325	0.132
1251	0.5325	0.132
1252	0.5325	0.132
1253	0.5011	0.1111
1254	0.4404	0.1112
1255	0.4404	0.1112
1256	0.4007	0.1252
1257	0.4007	0.1252
1258	0.382	0.1531
1259	0.382	0.1531
1260	0.3925	0.1601
1261	0.3925	0.1601
1262	0.3925	0.1601
1263	0.3925	0.1601
1264	0.4018	0.1461
1265	0.4018	0.1461
1266	0.3517	0.1532
1267	0.3517	0.1532
1268	0.2806	0.1463
1269	0.2293	0.1324
1270	0.2293	0.1324
1271	0.2293	0.1324
1272	0.1686	0.1325
1273	0.1686	0.1325
1274	0.1582	0.1255
1275	0.1582	0.1255
1276	0.1488	0.1395
1277	0.1488	0.1395
1278	0.1301	0.1674
1279	0.1113	0.1954
1280	0.1113	0.1954
1281	0.1113	0.1954
1282	0.1229	0.2233
1283	0.2045	0.2372
1284	0.2045	0.2372
1285	0.2045	0.2372
1286	0.3456	0.23
1287	0.3456	0.23
1288	0.4553	0.2019
1289	0.5033	0.153
1290	0.5033	0.153
1291	0.5033	0.153
1292	0.5033	0.153
1293	0.4614	0.1251
1294	0.3798	0.1112
1295	0.3798	0.1112
1296	0.3191	0.1113
1297	0.2993	0.1183
1298	0.2993	0.1183
1299	0.2993	0.1183
1300	0.2993	0.1183
1301	0.2993	0.1183
1302	0.3191	0.1113
1303	0.3191	0.1113
1304	0.3191	0.1113
1305	0.3191	0.1113
1306	0.3087	0.1043
1307	0.248	0.1044
1308	0.248	0.1044
1309	0.248	0.1044
1310	0.2177	0.1045
1311	0.2177	0.1045
1312	0.1885	0.1255
1313	0.1885	0.1255
1314	0.1885	0.1255
1315	0.1885	0.1255
1316	0.1791	0.1394
1317	0.2001	0.1534
1318	0.2012	0.1743
1319	0.2012	0.1743
1320	0.2326	0.1953
1321	0.3048	0.2231
1322	0.3048	0.2231
1323	0.4658	0.2089
1324	0.4658	0.2089
1325	0.5463	0.2018
1326	0.5463	0.2018
1327	0.5463	0.2018
1328	0.565	0.1739
1329	0.565	0.1739
1330	0.565	0.1739
1331	0.565	0.1739
1332	0.5231	0.146
1333	0.4321	0.1461
1334	0.4018	0.1461
1335	0.4018	0.1461
1336	0.3925	0.1601
1337	0.3925	0.1601
1338	0.3936	0.1811
1339	0.3936	0.1811
1340	0.3925	0.1601
1341	0.3925	0.1601
1342	0.3191	0.1113
1343	0.3191	0.1113
1344	0.3191	0.1113
1345	0.2039	0.0346
1346	0.0909	-0.0001
1347	0.0909	-0.0001
1348	0.0909	-0.0001
1349	0.0909	-0.0001
1350	0.0292	-0.021
1351	-0.0199	0.007
1352	-0.0188	0.0279
1353	-0.0188	0.0279
1354	-0.0177	0.0489
1355	-0.0177	0.0489
1356	-0.0259	0.0838
1357	-0.0259	0.0838
1358	-0.0259	0.0838
1359	0.0159	0.1117
1360	0.1499	0.1604
1361	0.1499	0.1604
1362	0.3643	0.2021
1363	0.3643	0.2021
1364	0.5683	0.2367
1365	0.5683	0.2367
1366	0.7199	0.2365
1367	0.7805	0.2364
1368	0.7805	0.2364
1369	0.7805	0.2364
1370	0.7502	0.2365
1371	0.7502	0.2365
1372	0.7094	0.2295
1373	0.7094	0.2295
1374	0.6896	0.2366
1375	0.6896	0.2366
1376	0.6802	0.2505
1377	0.6802	0.2505
1378	0.6802	0.2505
1379	0.6802	0.2505
1380	0.6802	0.2505
1381	0.6802	0.2505
1382	0.6802	0.2505
1383	0.6802	0.2505
1384	0.6499	0.2506
1385	0.6091	0.2436
1386	0.6091	0.2436
1387	0.6091	0.2436
1388	0.5694	0.2577
1389	0.5694	0.2577
1390	0.5297	0.2717
1391	0.5297	0.2717
1392	0.5193	0.2647
1393	0.5193	0.2647
1394	0.4994	0.2717
1395	0.4994	0.2717
1396	0.49	0.2857
1397	0.49	0.2857
1398	0.4702	0.2927
1399	0.4702	0.2927
1400	0.4818	0.3206
1401	0.4818	0.3206
1402	0.5832	0.3275
1403	0.5832	0.3275
1404	0.715	0.3343
1405	0.715	0.3343
1406	0.8456	0.3202
1407	0.8947	0.2922
1408	0.8947	0.2922
1409	0.8947	0.2922
1410	0.8643	0.2922
1411	0.8643	0.2922
1412	0.8131	0.2783
1413	0.7828	0.2783
1414	0.7828	0.2783
1415	0.7828	0.2783
1416	0.7828	0.2783
1417	0.7828	0.2783
1418	0.7932	0.2853
1419	0.7932	0.2853
1420	0.7932	0.2853
1421	0.7932	0.2853
1422	0.7932	0.2853
1423	0.7932	0.2853
1424	0.7535	0.2993
1425	0.7535	0.2993
1426	0.7127	0.2924
1427	0.6626	0.2995
1428	0.6626	0.2995
1429	0.6323	0.2995
1430	0.6323	0.2995
1431	0.6323	0.2995
1432	0.6229	0.3135
1433	0.6229	0.3135
1434	0.6146	0.3484
1435	0.6146	0.3484
1436	0.6356	0.3624
1437	0.6356	0.3624
1438	0.6157	0.3694
1439	0.6157	0.3694
1440	0.576	0.3834
1441	0.576	0.3834
1442	0.5771	0.4043
1443	0.5771	0.4043
1444	0.6284	0.4182
1445	0.6284	0.4182
1446	0.7486	0.3971
1447	0.8384	0.3761
1448	0.8384	0.3761
1449	0.8384	0.3761
1450	0.8572	0.3481
1451	0.8572	0.3481
1452	0.8258	0.3272
1453	0.7651	0.3273
1454	0.7651	0.3273
1455	0.7651	0.3273
1456	0.715	0.3343
1457	0.715	0.3343
1458	0.715	0.3343
1459	0.715	0.3343
1460	0.6951	0.3413
1461	0.6846	0.3343
1462	0.6835	0.3134
1463	0.6835	0.3134
1464	0.6521	0.2925
1465	0.6521	0.2925
1466	0.6008	0.2786
1467	0.6008	0.2786
1468	0.6008	0.2786
1469	0.6008	0.2786
1470	0.5589	0.2507
1471	0.5088	0.2577
1472	0.5088	0.2577
1473	0.4785	0.2578
1474	0.4388	0.2718
1475	0.4388	0.2718
1476	0.4189	0.2788
1477	0.3991	0.2858
1478	0.3991	0.2858
1479	0.3991	0.2858
1480	0.3781	0.2719
1481	0.3781	0.2719
1482	0.3583	0.2789
1483	0.3583	0.2789
1484	0.3991	0.2858
1485	0.3991	0.2858
1486	0.4994	0.2717
1487	0.4994	0.2717
1488	0.5997	0.2576
1489	0.5997	0.2576
1490	0.6383	0.2227
1491	0.6383	0.2227
1492	0.6069	0.2017
1493	0.6069	0.2017
1494	0.5358	0.1948
1495	0.5358	0.1948
1496	0.4751	0.1949
1497	0.4751	0.1949
1498	0.4459	0.2159
1499	0.4564	0.2229
1500	0.4564	0.2229
1501	0.4564	0.2229
1502	0.4867	0.2229
1503	0.4867	0.2229
1504	0.4972	0.2298
1505	0.4972	0.2298
1506	0.4867	0.2229
1507	0.4867	0.2229
1508	0.4658	0.2089
1509	0.4658	0.2089
1510	0.4062	0.2299
1511	0.4062	0.2299
1512	0.3666	0.244
1513	0.3478	0.2719
1514	0.3478	0.2719
1515	0.3478	0.2719
1516	0.3384	0.2859
1517	0.3384	0.2859
1518	0.3489	0.2929
1519	0.3489	0.2929
1520	0.3803	0.3138
1521	0.3803	0.3138
1522	0.4713	0.3137
1523	0.4713	0.3137
1524	0.6124	0.3065
1525	0.6124	0.3065
1526	0.7023	0.2854
1527	0.7105	0.2505
1528	0.7105	0.2505
1529	0.7105	0.2505
1530	0.6791	0.2296
1531	0.6791	0.2296
1532	0.5986	0.2367
1533	0.5986	0.2367
1534	0.5683	0.2367
1535	0.5683	0.2367
1536	0.5694	0.2577
1537	0.56	0.2717
1538	0.56	0.2717
1539	0.56	0.2717
1540	0.56	0.2717
1541	0.56	0.2717
1542	0.5496	0.2647
1543	0.5496	0.2647
1544	0.5088	0.2577
1545	0.4575	0.2438
1546	0.4575	0.2438
1547	0.4575	0.2438
1548	0.4167	0.2369
1549	0.3666	0.244
1550	0.3666	0.244
1551	0.3362	0.244
1552	0.3362	0.244
1553	0.3362	0.244
1554	0.3164	0.251
1555	0.3059	0.244
1556	0.3059	0.244
1557	0.3059	0.244
1558	0.3059	0.244
1559	0.307	0.265
1560	0.307	0.265
1561	0.307	0.265
1562	0.3991	0.2858
1563	0.3991	0.2858
1564	0.5612	0.2926
1565	0.5612	0.2926
1566	0.7023	0.2854
1567	0.7023	0.2854
1568	0.7921	0.2644
1569	0.7921	0.2644
1570	0.8213	0.2434
1571	0.8213	0.2434
1572	0.8213	0.2434
1573	0.7805	0.2364
1574	0.7293	0.2225
1575	0.7293	0.2225
1576	0.7199	0.2365
1577	0.7199	0.2365
1578	0.742	0.2714
1579	0.742	0.2714
1580	0.7943	0.3063
1581	0.8456	0.3202
1582	0.8456	0.3202
1583	0.8677	0.3551
1584	0.8677	0.3551
1585	0.8677	0.3551
1586	0.8886	0.369
1587	0.8886	0.369
1588	0.8699	0.397
1589	0.8699	0.397
1590	0.8522	0.4459
1591	0.8522	0.4459
1592	0.8837	0.4668
1593	0.8837	0.4668
1594	0.8754	0.5017
1595	0.8754	0.5017
1596	0.8859	0.5087
1597	0.8859	0.5087
1598	0.8952	0.4947
1599	0.8952	0.4947
1600	0.8743	0.4808
1601	0.8743	0.4808
1602	0.8649	0.4948
1603	0.8649	0.4948
1604	0.9454	0.4877
1605	0.9454	0.4877
1606	1.0854	0.4595
1607	1.0854	0.4595
1608	1.1648	0.4315
1609	1.1648	0.4315
1610	1.1731	0.3966
1611	1.1731	0.3966
1612	1.1731	0.3966
1613	1.1731	0.3966
1614	1.1113	0.3757
1615	1.0297	0.3618
1616	0.9785	0.3479
1617	0.9785	0.3479
1618	0.968	0.341
1619	0.968	0.341
1620	0.9377	0.341
1621	0.9377	0.341
1622	0.8969	0.3341
1623	0.8643	0.2922
1624	0.8643	0.2922
1625	0.8643	0.2922
1626	0.7723	0.2714
1627	0.7723	0.2714
1628	0.6896	0.2366
1629	0.6896	0.2366
1630	0.5882	0.2297
1631	0.5882	0.2297
1632	0.5474	0.2228
1633	0.5474	0.2228
1634	0.4972	0.2298
1635	0.4669	0.2299
1636	0.4669	0.2299
1637	0.4564	0.2229
1638	0.4564	0.2229
1639	0.4564	0.2229
1640	0.4272	0.2439
1641	0.4272	0.2439
1642	0.4388	0.2718
1643	0.4388	0.2718
1644	0.5297	0.2717
1645	0.5297	0.2717
1646	0.6416	0.2855
1647	0.7221	0.2784
1648	0.7221	0.2784
1649	0.7221	0.2784
1650	0.7409	0.2505
1651	0.7409	0.2505
1652	0.699	0.2226
1653	0.699	0.2226
1654	0.608	0.2227
1655	0.608	0.2227
1656	0.5672	0.2158
1657	0.5672	0.2158
1658	0.5777	0.2227
1659	0.5777	0.2227
1660	0.5986	0.2367
1661	0.5986	0.2367
1662	0.5997	0.2576
1663	0.5997	0.2576
1664	0.5997	0.2576
1665	0.6196	0.2506
1666	0.6196	0.2506
1667	0.5694	0.2577
1668	0.5286	0.2507
1669	0.5286	0.2507
1670	0.4586	0.2648
1671	0.4586	0.2648
1672	0.4283	0.2648
1673	0.4283	0.2648
1674	0.3886	0.2789
1675	0.3886	0.2789
1676	0.3792	0.2928
1677	0.3792	0.2928
1678	0.3897	0.2998
1679	0.4118	0.3347
1680	0.4118	0.3347
1681	0.4118	0.3347
1682	0.4118	0.3347
1683	0.5226	0.3276
1684	0.6532	0.3134
1685	0.6532	0.3134
1686	0.7023	0.2854
1687	0.7023	0.2854
1688	0.7001	0.2435
1689	0.7001	0.2435
1690	0.6477	0.2087
1691	0.6477	0.2087
1692	0.5766	0.2018
1693	0.5766	0.2018
1694	0.5474	0.2228
1695	0.5474	0.2228
1696	0.5474	0.2228
1697	0.5683	0.2367
1698	0.5893	0.2507
1699	0.5799	0.2646
1700	0.5799	0.2646
1701	0.5799	0.2646
1702	0.5799	0.2646
1703	0.5799	0.2646
1704	0.5297	0.2717
1705	0.5297	0.2717
1706	0.4785	0.2578
1707	0.4785	0.2578
1708	0.4178	0.2579
1709	0.4178	0.2579
1710	0.3875	0.2579
1711	0.3875	0.2579
1712	0.3572	0.258
1713	0.3572	0.258
1714	0.3572	0.258
1715	0.3373	0.265
1716	0.3175	0.272
1717	0.3175	0.272
1718	0.3186	0.2929
1719	0.3699	0.3068
1720	0.3699	0.3068
1721	0.3699	0.3068
1722	0.511	0.2997
1723	0.511	0.2997
1724	0.6218	0.2925
1725	0.6218	0.2925
1726	0.6907	0.2575
1727	0.6907	0.2575
1728	0.6791	0.2296
1729	0.6791	0.2296
1730	0.6791	0.2296
1731	0.6477	0.2087
1732	0.5871	0.2087
1733	0.5672	0.2158
1734	0.5672	0.2158
1735	0.5672	0.2158
1736	0.5683	0.2367
1737	0.5683	0.2367
1738	0.5589	0.2507
1739	0.5589	0.2507
1740	0.5788	0.2437
1741	0.5788	0.2437
1742	0.5788	0.2437
1743	0.5788	0.2437
1744	0.5788	0.2437
1745	0.5286	0.2507
1746	0.4878	0.2438
1747	0.4878	0.2438
1748	0.4377	0.2509
1749	0.4377	0.2509
1750	0.4073	0.2509
1751	0.4073	0.2509
1752	0.3677	0.2649
1753	0.3677	0.2649
1754	0.3677	0.2649
1755	0.3478	0.2719
1756	0.3478	0.2719
1757	0.3384	0.2859
1758	0.3384	0.2859
1759	0.3384	0.2859
1760	0.3594	0.2999
1761	0.3594	0.2999
1762	0.441	0.3137
1763	0.441	0.3137
1764	0.5821	0.3065
1765	0.5821	0.3065
1766	0.6918	0.2785
1767	0.6918	0.2785
1768	0.7199	0.2365
1769	0.7199	0.2365
1770	0.6686	0.2226
1771	0.6069	0.2017
1772	0.6069	0.2017
1773	0.6069	0.2017
1774	0.5661	0.1948
1775	0.5661	0.1948
1776	0.5463	0.2018
1777	0.5463	0.2018
1778	0.5567	0.2088
1779	0.5567	0.2088
1780	0.5672	0.2158
1781	0.5672	0.2158
1782	0.5975	0.2157
1783	0.5975	0.2157
1784	0.5882	0.2297
1785	0.5882	0.2297
1786	0.538	0.2368
1787	0.538	0.2368
1788	0.4774	0.2368
1789	0.4774	0.2368
1790	0.4366	0.2299
1791	0.4366	0.2299
1792	0.4366	0.2299
1793	0.3864	0.237
1794	0.3864	0.237
1795	0.3561	0.237
1796	0.3561	0.237
1797	0.3561	0.237
1798	0.3456	0.23
1799	0.3153	0.2301
1800	0.2954	0.2371
1801	0.2954	0.2371
1802	0.3059	0.244
1803	0.3059	0.244
1804	0.3059	0.244
1805	0.3059	0.244
1806	0.377	0.2509
1807	0.4972	0.2298
1808	0.5766	0.2018
1809	0.5766	0.2018
1810	0.565	0.1739
1811	0.565	0.1739
1812	0.5231	0.146
1813	0.5231	0.146
1814	0.4718	0.1321
1815	0.4718	0.1321
1816	0.4718	0.1321
1817	0.4217	0.1391
1818	0.4228	0.1601
1819	0.4228	0.1601
1820	0.4333	0.167
1821	0.4333	0.167
1822	0.4636	0.167
1823	0.4636	0.167
1824	0.4542	0.181
1825	0.4542	0.181
1826	0.4542	0.181
1827	0.4437	0.174
1828	0.4134	0.1741
1829	0.4134	0.1741
1830	0.3737	0.1881
1831	0.3539	0.1951
1832	0.3539	0.1951
1833	0.3539	0.1951
1834	0.3445	0.2091
1835	0.3445	0.2091
1836	0.3351	0.2231
1837	0.3351	0.2231
1838	0.3351	0.2231
1839	0.3351	0.2231
1840	0.3467	0.251
1841	0.3781	0.2719
1842	0.4796	0.2787
1843	0.4796	0.2787
1844	0.6008	0.2786
1845	0.6008	0.2786
1846	0.6697	0.2436
1847	0.6697	0.2436
1848	0.6582	0.2156
1849	0.6582	0.2156
1850	0.6163	0.1878
1851	0.5358	0.1948
1852	0.5358	0.1948
1853	0.5358	0.1948
1854	0.5066	0.2158
1855	0.5066	0.2158
1856	0.5275	0.2298
1857	0.5275	0.2298
1858	0.5275	0.2298
1859	0.5275	0.2298
1860	0.5286	0.2507
1861	0.5391	0.2577
1862	0.5391	0.2577
1863	0.4889	0.2648
1864	0.4889	0.2648
1865	0.4889	0.2648
1866	0.4889	0.2648
1867	0.4481	0.2578
1868	0.4073	0.2509
1869	0.4073	0.2509
1870	0.3677	0.2649
1871	0.3677	0.2649
1872	0.3478	0.2719
1873	0.3478	0.2719
1874	0.328	0.2789
1875	0.328	0.2789
1876	0.3081	0.286
1877	0.3081	0.286
1878	0.2883	0.293
1879	0.2883	0.293
1880	0.2883	0.293
1881	0.2883	0.293
1882	0.3302	0.3209
1883	0.3302	0.3209
1884	0.4515	0.3207
1885	0.4515	0.3207
1886	0.5926	0.3135
1887	0.5926	0.3135
1888	0.7023	0.2854
1889	0.7023	0.2854
1890	0.7023	0.2854
1891	0.7116	0.2714
1892	0.7012	0.2645
1893	0.7012	0.2645
1894	0.6813	0.2715
1895	0.6813	0.2715
1896	0.6929	0.2994
1897	0.6929	0.2994
1898	0.7045	0.3273
1899	0.7045	0.3273
1900	0.694	0.3204
1901	0.694	0.3204
1902	0.6626	0.2995
1903	0.6626	0.2995
1904	0.6207	0.2716
1905	0.6207	0.2716
1906	0.5683	0.2367
1907	0.5683	0.2367
1908	0.4961	0.2089
1909	0.4961	0.2089
1910	0.4448	0.195
1911	0.4051	0.209
1912	0.4051	0.209
1913	0.3759	0.23
1914	0.3759	0.23
1915	0.3759	0.23
1916	0.3759	0.23
1917	0.3572	0.258
1918	0.3572	0.258
1919	0.3583	0.2789
1920	0.3489	0.2929
1921	0.3489	0.2929
1922	0.3489	0.2929
1923	0.3489	0.2929
1924	0.35	0.3138
1925	0.35	0.3138
1926	0.4107	0.3138
1927	0.5413	0.2996
1928	0.5413	0.2996
1929	0.5413	0.2996
1930	0.651	0.2715
1931	0.6907	0.2575
1932	0.6907	0.2575
1933	0.6907	0.2575
1934	0.6802	0.2505
1935	0.6802	0.2505
1936	0.6394	0.2436
1937	0.6394	0.2436
1938	0.6091	0.2436
1939	0.6091	0.2436
1940	0.6102	0.2646
1941	0.6102	0.2646
1942	0.6312	0.2785
1943	0.6312	0.2785
1944	0.6312	0.2785
1945	0.6218	0.2925
1946	0.6218	0.2925
1947	0.6218	0.2925
1948	0.5915	0.2926
1949	0.5915	0.2926
1950	0.5507	0.2856
1951	0.5507	0.2856
1952	0.5099	0.2787
1953	0.5099	0.2787
1954	0.5099	0.2787
1955	0.4796	0.2787
1956	0.4702	0.2927
1957	0.4702	0.2927
1958	0.4702	0.2927
1959	0.4608	0.3067
1960	0.441	0.3137
1961	0.441	0.3137
1962	0.4515	0.3207
1963	0.4515	0.3207
1964	0.4724	0.3346
1965	0.4724	0.3346
1966	0.554	0.3485
1967	0.554	0.3485
1968	0.6951	0.3413
1969	0.6951	0.3413
1970	0.7954	0.3272
1971	0.7954	0.3272
1972	0.8247	0.3062
1973	0.8247	0.3062
1974	0.8037	0.2923
1975	0.8037	0.2923
1976	0.8037	0.2923
1977	0.7723	0.2714
1978	0.7524	0.2784
1979	0.7524	0.2784
1980	0.7535	0.2993
1981	0.7535	0.2993
1982	0.7745	0.3133
1983	0.7745	0.3133
1984	0.7756	0.3342
1985	0.7756	0.3342
1986	0.7756	0.3342
1987	0.7756	0.3342
1988	0.7453	0.3343
1989	0.7453	0.3343
1990	0.7453	0.3343
1991	0.694	0.3204
1992	0.694	0.3204
1993	0.694	0.3204
1994	0.6334	0.3204
1995	0.5727	0.3205
1996	0.5623	0.3136
1997	0.5623	0.3136
1998	0.5424	0.3206
1999	0.533	0.3346
2000	0.533	0.3346
2001	0.533	0.3346
2002	0.533	0.3346
2003	0.533	0.3346
2004	0.533	0.3346
2005	0.5132	0.3416
2006	0.5027	0.3346
2007	0.4934	0.3486
2008	0.5341	0.3555
2009	0.6262	0.3763
2010	0.6262	0.3763
2011	0.6262	0.3763
2012	0.7872	0.3622
2013	0.8875	0.348
2014	0.8875	0.348
2015	0.8875	0.348
2016	0.9272	0.334
2017	0.9272	0.334
2018	0.9272	0.334
2019	0.9167	0.3271
2020	0.9062	0.3201
2021	0.9062	0.3201
2022	0.877	0.3411
2023	0.877	0.3411
2024	0.8781	0.362
2025	0.8781	0.362
2026	0.8886	0.369
2027	0.8886	0.369
2028	0.8886	0.369
2029	0.8886	0.369
2030	0.8886	0.369
2031	0.8886	0.369
2032	0.8677	0.3551
2033	0.8677	0.3551
2034	0.807	0.3551
2035	0.807	0.3551
2036	0.7464	0.3552
2037	0.7161	0.3553
2038	0.7161	0.3553
2039	0.7161	0.3553
2040	0.6857	0.3553
2041	0.6857	0.3553
2042	0.6659	0.3623
2043	0.6659	0.3623
2044	0.6367	0.3833
2045	0.6367	0.3833
2046	0.6367	0.3833
2047	0.6367	0.3833
2048	0.6064	0.3833
2049	0.6064	0.3833
[truncated: 39,951 more rows]
