# Supplementary material for: Gender-Related Effect in Oxygenation Dynamics by Using Far-Infrared Intervention with Near-Infrared Spectroscopy Measurement: A Gender Differences Controlled Trial
Source: PLoS One. 2015 Nov 10;10(11):e0135166. doi: 10.1371/journal.pone.0135166 (PMC4640828; doi:10.1371/journal.pone.0135166)
Supplement: S18 File — (XLSX) [file pone.0135166.s018.xlsx]

## Sheet: 工作表1
50	-0.011	-0.0066
51	-0.0207	0.0075
52	-0.0207	0.0075
53	-0.0207	0.0075
54	-0.011	-0.0066
55	-0.011	-0.0066
56	-0.011	-0.0066
57	-0.011	-0.0066
58	-0.0317	0.0008
59	-0.0317	0.0008
60	-0.0317	0.0008
61	-0.0207	0.0075
62	-0.0207	0.0075
63	-0.0096	0.0141
64	-0.0096	0.0141
65	-0.0096	0.0141
66	-0.0096	0.0141
67	-0.0096	0.0141
68	-0.0096	0.0141
69	-0.0096	0.0141
70	-0.0096	0.0141
71	-0.0096	0.0141
72	-0.0096	0.0141
73	-0.0303	0.0215
74	-0.0303	0.0215
75	-0.0414	0.0149
76	-0.0414	0.0149
77	-0.0414	0.0149
78	-0.0414	0.0149
79	-0.0524	0.0082
80	-0.0731	0.0156
81	-0.0731	0.0156
82	-0.0731	0.0156
83	-0.0524	0.0082
84	-0.0524	0.0082
85	-0.0524	0.0082
86	-0.0303	0.0215
87	-0.0303	0.0215
88	0.0014	0.0208
89	0.0014	0.0208
90	0.0221	0.0133
91	0.0221	0.0133
92	0.0221	0.0133
93	0.0318	-0.0007
94	0.0318	-0.0007
95	0.0111	0.0067
96	0.0111	0.0067
97	0.0111	0.0067
98	0.0111	0.0067
99	0.0111	0.0067
100	0.0111	0.0067
101	0.0111	0.0067
102	0.0111	0.0067
103	0.0207	-0.0074
104	0.0207	-0.0074
105	0	0
106	0	0
107	0	0
108	0	0
109	0	0
110	0	0
111	-0.0207	0.0075
112	-0.0207	0.0075
113	-0.0207	0.0075
114	-0.0207	0.0075
115	-0.011	-0.0066
116	-0.0221	-0.0133
117	-0.0221	-0.0133
118	-0.0427	-0.0059
119	-0.0538	-0.0125
120	-0.0538	-0.0125
121	-0.0538	-0.0125
122	-0.0221	-0.0133
123	-0.0221	-0.0133
124	-0.0221	-0.0133
125	0	0
126	0	0
127	0	0
128	0.0318	-0.0007
129	0.0525	-0.0082
130	0.0525	-0.0082
131	0.0525	-0.0082
132	0.0525	-0.0082
133	0.0525	-0.0082
134	0.0525	-0.0082
135	0.0635	-0.0015
136	0.0635	-0.0015
137	0.0428	0.0059
138	0.0428	0.0059
139	0.0428	0.0059
140	0.0428	0.0059
141	0.0428	0.0059
142	0.0635	-0.0015
143	0.0635	-0.0015
144	0.0635	-0.0015
145	0.0635	-0.0015
146	0.0635	-0.0015
147	0.0635	-0.0015
148	0.0635	-0.0015
149	0.0428	0.0059
150	0.0428	0.0059
151	0.0428	0.0059
152	0.0428	0.0059
153	0.0428	0.0059
154	0.0428	0.0059
155	0.0428	0.0059
156	0.0221	0.0133
157	0.0111	0.0067
158	0.0111	0.0067
159	0.0111	0.0067
160	0.0111	0.0067
161	0.0207	-0.0074
162	0	0
163	-0.0207	0.0075
164	-0.0207	0.0075
165	-0.011	-0.0066
166	-0.011	-0.0066
167	0	0
168	0.0221	0.0133
169	0.0221	0.0133
170	0.0221	0.0133
171	0.0856	0.0118
172	0.0856	0.0118
173	0.0966	0.0185
174	0.0966	0.0185
175	0.0966	0.0185
176	0.0966	0.0185
177	0.1284	0.0177
178	0.1187	0.0318
179	0.1187	0.0318
180	0.1187	0.0318
181	0.1187	0.0318
182	0.1187	0.0318
183	0.1187	0.0318
184	0.1187	0.0318
185	0.1187	0.0318
186	0.1187	0.0318
187	0.1187	0.0318
188	0.1187	0.0318
189	0.1394	0.0244
190	0.1394	0.0244
191	0.1394	0.0244
192	0.1187	0.0318
193	0.1187	0.0318
194	0.1187	0.0318
195	0.1091	0.0459
196	0.1091	0.0459
197	0.1187	0.0318
198	0.1187	0.0318
199	0.1187	0.0318
200	0.098	0.0392
201	0.098	0.0392
202	0.098	0.0392
203	0.0773	0.0466
204	0.0773	0.0466
205	0.0663	0.04
206	0.0663	0.04
207	0.0663	0.04
208	0.0663	0.04
209	0.0552	0.0333
210	0.0552	0.0333
211	0.0552	0.0333
212	0.0663	0.04
213	0.0663	0.04
214	0.1091	0.0459
215	0.1408	0.0451
216	0.1408	0.0451
217	0.1615	0.0377
218	0.1615	0.0377
219	0.1725	0.0444
220	0.1725	0.0444
221	0.1725	0.0444
222	0.1725	0.0444
223	0.1725	0.0444
224	0.1725	0.0444
225	0.1615	0.0377
226	0.1615	0.0377
227	0.1615	0.0377
228	0.1504	0.031
229	0.1504	0.031
230	0.1504	0.031
231	0.1504	0.031
232	0.1504	0.031
233	0.1297	0.0385
234	0.1297	0.0385
235	0.1297	0.0385
236	0.1297	0.0385
237	0.1297	0.0385
238	0.1187	0.0318
239	0.1187	0.0318
240	0.1187	0.0318
241	0.1077	0.0251
242	0.1077	0.0251
243	0.087	0.0326
244	0.087	0.0326
245	0.087	0.0326
246	0.0759	0.0259
247	0.0856	0.0118
248	0.0856	0.0118
249	0.0649	0.0192
250	0.0538	0.0126
251	0.0538	0.0126
252	0.0538	0.0126
253	0.0856	0.0118
254	0.0856	0.0118
255	0.0856	0.0118
256	0.1173	0.0111
257	0.1173	0.0111
258	0.1173	0.0111
259	0.1284	0.0177
260	0.138	0.0036
261	0.138	0.0036
262	0.138	0.0036
263	0.138	0.0036
264	0.138	0.0036
265	0.138	0.0036
266	0.138	0.0036
267	0.138	0.0036
268	0.138	0.0036
269	0.1491	0.0103
270	0.1491	0.0103
271	0.1504	0.031
272	0.1504	0.031
273	0.1504	0.031
274	0.1918	0.0162
275	0.1822	0.0303
276	0.1822	0.0303
277	0.1822	0.0303
278	0.1822	0.0303
279	0.1822	0.0303
280	0.1822	0.0303
281	0.1822	0.0303
282	0.1822	0.0303
283	0.1822	0.0303
284	0.1615	0.0377
285	0.1615	0.0377
286	0.1615	0.0377
287	0.1615	0.0377
288	0.1615	0.0377
289	0.1408	0.0451
290	0.1408	0.0451
291	0.1408	0.0451
292	0.1504	0.031
293	0.1504	0.031
294	0.1504	0.031
295	0.1297	0.0385
296	0.1091	0.0459
297	0.1187	0.0318
298	0.1187	0.0318
299	0.1201	0.0525
300	0.1201	0.0525
301	0.1201	0.0525
302	0.1629	0.0584
303	0.2153	0.0503
304	0.2153	0.0503
305	0.2153	0.0503
306	0.2263	0.0569
307	0.2263	0.0569
308	0.247	0.0495
309	0.247	0.0495
310	0.247	0.0495
311	0.2374	0.0636
312	0.2374	0.0636
313	0.2374	0.0636
314	0.2374	0.0636
315	0.2581	0.0561
316	0.2581	0.0561
317	0.2581	0.0561
318	0.2581	0.0561
319	0.2581	0.0561
320	0.2374	0.0636
321	0.2374	0.0636
322	0.2374	0.0636
323	0.2263	0.0569
324	0.2263	0.0569
325	0.2263	0.0569
326	0.2263	0.0569
327	0.2263	0.0569
328	0.2263	0.0569
329	0.2263	0.0569
330	0.2153	0.0503
331	0.2153	0.0503
332	0.1946	0.0577
333	0.1836	0.051
334	0.1836	0.051
335	0.1836	0.051
336	0.1836	0.051
337	0.1836	0.051
338	0.1739	0.0651
339	0.1629	0.0584
340	0.1629	0.0584
341	0.1422	0.0659
342	0.1422	0.0659
343	0.1422	0.0659
344	0.1422	0.0659
345	0.1422	0.0659
346	0.1422	0.0659
347	0.1739	0.0651
348	0.1739	0.0651
349	0.2263	0.0569
350	0.2374	0.0636
351	0.2374	0.0636
352	0.2581	0.0561
353	0.2581	0.0561
354	0.2581	0.0561
355	0.2581	0.0561
356	0.2581	0.0561
357	0.2581	0.0561
358	0.247	0.0495
359	0.2263	0.0569
360	0.2263	0.0569
361	0.2263	0.0569
362	0.2263	0.0569
363	0.2263	0.0569
364	0.2263	0.0569
365	0.247	0.0495
366	0.2581	0.0561
367	0.2581	0.0561
368	0.2581	0.0561
369	0.2374	0.0636
370	0.2374	0.0636
371	0.2374	0.0636
372	0.2263	0.0569
373	0.2153	0.0503
374	0.2153	0.0503
375	0.2153	0.0503
376	0.2153	0.0503
377	0.2043	0.0436
378	0.2043	0.0436
379	0.1836	0.051
380	0.1836	0.051
381	0.1822	0.0303
382	0.1822	0.0303
383	0.1615	0.0377
384	0.1615	0.0377
385	0.1822	0.0303
386	0.1822	0.0303
387	0.1822	0.0303
388	0.1932	0.0369
389	0.2346	0.0221
390	0.2346	0.0221
391	0.2457	0.0287
392	0.2457	0.0287
393	0.2457	0.0287
394	0.2567	0.0354
395	0.2677	0.0421
396	0.2677	0.0421
397	0.2677	0.0421
398	0.2677	0.0421
399	0.2567	0.0354
400	0.2567	0.0354
401	0.236	0.0428
402	0.236	0.0428
403	0.236	0.0428
404	0.236	0.0428
405	0.2457	0.0287
406	0.2457	0.0287
407	0.2457	0.0287
408	0.2457	0.0287
409	0.225	0.0362
410	0.225	0.0362
411	0.2139	0.0295
412	0.2139	0.0295
413	0.2043	0.0436
414	0.2043	0.0436
415	0.2043	0.0436
416	0.2043	0.0436
417	0.2153	0.0503
418	0.2153	0.0503
419	0.1946	0.0577
420	0.1946	0.0577
421	0.1946	0.0577
422	0.1946	0.0577
423	0.1836	0.051
424	0.1836	0.051
425	0.1725	0.0444
426	0.1725	0.0444
427	0.1518	0.0518
428	0.1518	0.0518
429	0.1836	0.051
430	0.1836	0.051
431	0.1836	0.051
432	0.1836	0.051
433	0.2056	0.0643
434	0.247	0.0495
435	0.2677	0.0421
436	0.2677	0.0421
437	0.2677	0.0421
438	0.2677	0.0421
439	0.247	0.0495
440	0.247	0.0495
441	0.2567	0.0354
442	0.2567	0.0354
443	0.2567	0.0354
444	0.236	0.0428
445	0.236	0.0428
446	0.236	0.0428
447	0.236	0.0428
448	0.236	0.0428
449	0.2263	0.0569
450	0.2263	0.0569
451	0.2263	0.0569
452	0.2263	0.0569
453	0.2263	0.0569
454	0.2263	0.0569
455	0.2153	0.0503
456	0.2153	0.0503
457	0.2153	0.0503
458	0.2153	0.0503
459	0.2043	0.0436
460	0.2043	0.0436
461	0.1932	0.0369
462	0.1932	0.0369
463	0.1725	0.0444
464	0.1725	0.0444
465	0.1615	0.0377
466	0.1615	0.0377
467	0.1615	0.0377
468	0.1615	0.0377
469	0.1725	0.0444
470	0.1725	0.0444
471	0.1725	0.0444
472	0.1946	0.0577
473	0.2263	0.0569
474	0.2263	0.0569
475	0.2263	0.0569
476	0.247	0.0495
477	0.247	0.0495
478	0.247	0.0495
479	0.247	0.0495
480	0.2677	0.0421
481	0.247	0.0495
482	0.247	0.0495
483	0.247	0.0495
484	0.247	0.0495
485	0.247	0.0495
486	0.236	0.0428
487	0.236	0.0428
488	0.236	0.0428
489	0.236	0.0428
490	0.236	0.0428
491	0.236	0.0428
492	0.236	0.0428
493	0.225	0.0362
494	0.225	0.0362
495	0.225	0.0362
496	0.225	0.0362
497	0.225	0.0362
498	0.2043	0.0436
499	0.2043	0.0436
500	0.1932	0.0369
501	0.1932	0.0369
502	0.1932	0.0369
503	0.1932	0.0369
504	0.1822	0.0303
505	0.1822	0.0303
506	0.1711	0.0236
507	0.1711	0.0236
508	0.1504	0.031
509	0.1394	0.0244
510	0.1394	0.0244
511	0.1394	0.0244
512	0.1394	0.0244
513	0.1711	0.0236
514	0.1711	0.0236
515	0.1932	0.0369
516	0.1932	0.0369
517	0.2457	0.0287
518	0.2457	0.0287
519	0.2567	0.0354
520	0.2567	0.0354
521	0.2567	0.0354
522	0.2567	0.0354
523	0.2567	0.0354
524	0.2567	0.0354
525	0.2567	0.0354
526	0.2567	0.0354
527	0.2567	0.0354
528	0.2567	0.0354
529	0.2567	0.0354
530	0.2567	0.0354
531	0.2567	0.0354
532	0.2567	0.0354
533	0.2677	0.0421
534	0.2677	0.0421
535	0.2677	0.0421
536	0.2677	0.0421
537	0.247	0.0495
538	0.247	0.0495
539	0.247	0.0495
540	0.247	0.0495
541	0.247	0.0495
542	0.247	0.0495
543	0.247	0.0495
544	0.247	0.0495
545	0.247	0.0495
546	0.2263	0.0569
547	0.2263	0.0569
548	0.2263	0.0569
549	0.2263	0.0569
550	0.2263	0.0569
551	0.1946	0.0577
552	0.1725	0.0444
553	0.1394	0.0244
554	0.1394	0.0244
555	0.1173	0.0111
556	0.1173	0.0111
557	0.1173	0.0111
558	0.0745	0.0052
559	0.0525	-0.0082
560	0.0525	-0.0082
561	0.0635	-0.0015
562	0.0635	-0.0015
563	0.1063	0.0044
564	0.1063	0.0044
565	0.1063	0.0044
566	0.1491	0.0103
567	0.1808	0.0095
568	0.1808	0.0095
569	0.1918	0.0162
570	0.1918	0.0162
571	0.1918	0.0162
572	0.2029	0.0229
573	0.2029	0.0229
574	0.2029	0.0229
575	0.2029	0.0229
576	0.2139	0.0295
577	0.2139	0.0295
578	0.2139	0.0295
579	0.2139	0.0295
580	0.2139	0.0295
581	0.2043	0.0436
582	0.2043	0.0436
583	0.2043	0.0436
584	0.2043	0.0436
585	0.2043	0.0436
586	0.2043	0.0436
587	0.2043	0.0436
588	0.2043	0.0436
589	0.2043	0.0436
590	0.2043	0.0436
591	0.1932	0.0369
592	0.1932	0.0369
593	0.1725	0.0444
594	0.1725	0.0444
595	0.1615	0.0377
596	0.1615	0.0377
597	0.1408	0.0451
598	0.1408	0.0451
599	0.1408	0.0451
600	0.1297	0.0385
601	0.1187	0.0318
602	0.1187	0.0318
603	0.1187	0.0318
604	0.1077	0.0251
605	0.098	0.0392
606	0.098	0.0392
607	0.1297	0.0385
608	0.1297	0.0385
609	0.1297	0.0385
610	0.1822	0.0303
611	0.1822	0.0303
612	0.1822	0.0303
613	0.1822	0.0303
614	0.1932	0.0369
615	0.2043	0.0436
616	0.225	0.0362
617	0.225	0.0362
618	0.225	0.0362
619	0.2043	0.0436
620	0.2043	0.0436
621	0.2043	0.0436
622	0.1932	0.0369
623	0.1932	0.0369
624	0.1932	0.0369
625	0.1932	0.0369
626	0.1932	0.0369
627	0.1932	0.0369
628	0.1932	0.0369
629	0.1725	0.0444
630	0.1725	0.0444
631	0.1822	0.0303
632	0.1822	0.0303
633	0.1711	0.0236
634	0.1711	0.0236
635	0.1504	0.031
636	0.1504	0.031
637	0.1504	0.031
638	0.1394	0.0244
639	0.1284	0.0177
640	0.1284	0.0177
641	0.1284	0.0177
642	0.1077	0.0251
643	0.0966	0.0185
644	0.0966	0.0185
645	0.0966	0.0185
646	0.0856	0.0118
647	0.0745	0.0052
648	0.0745	0.0052
649	0.0538	0.0126
650	0.0538	0.0126
651	0.0538	0.0126
652	0.0538	0.0126
653	0.0538	0.0126
654	0.0856	0.0118
655	0.0856	0.0118
656	0.0856	0.0118
657	0.0856	0.0118
658	0.138	0.0036
659	0.1491	0.0103
660	0.1698	0.0029
661	0.1698	0.0029
662	0.1601	0.017
663	0.1601	0.017
664	0.1601	0.017
665	0.1698	0.0029
666	0.1698	0.0029
667	0.1698	0.0029
668	0.1698	0.0029
669	0.1698	0.0029
670	0.1491	0.0103
671	0.1491	0.0103
672	0.1491	0.0103
673	0.1491	0.0103
674	0.1491	0.0103
675	0.1491	0.0103
676	0.1491	0.0103
677	0.1491	0.0103
678	0.138	0.0036
679	0.127	-0.003
680	0.127	-0.003
681	0.1063	0.0044
682	0.1063	0.0044
683	0.0952	-0.0023
684	0.0952	-0.0023
685	0.0842	-0.0089
686	0.0732	-0.0156
687	0.0732	-0.0156
688	0.0732	-0.0156
689	0.0732	-0.0156
690	0.0732	-0.0156
691	0.0525	-0.0082
692	0.0414	-0.0148
693	0.0304	-0.0215
694	0.0304	-0.0215
695	0.0304	-0.0215
696	0.0193	-0.0281
697	0.0193	-0.0281
698	0.0193	-0.0281
699	-0.0124	-0.0274
700	-0.0345	-0.0407
701	-0.0345	-0.0407
702	-0.0138	-0.0481
703	0.0083	-0.0348
704	0.0083	-0.0348
705	0.0607	-0.043
706	0.0607	-0.043
707	0.0718	-0.0363
708	0.0718	-0.0363
709	0.0718	-0.0363
710	0.0925	-0.0437
711	0.0925	-0.0437
712	0.1035	-0.0371
713	0.1035	-0.0371
714	0.1035	-0.0371
715	0.0828	-0.0297
716	0.0828	-0.0297
717	0.0828	-0.0297
718	0.0828	-0.0297
719	0.0828	-0.0297
720	0.0828	-0.0297
721	0.0828	-0.0297
722	0.0828	-0.0297
723	0.0828	-0.0297
724	0.0828	-0.0297
725	0.0718	-0.0363
726	0.0718	-0.0363
727	0.0718	-0.0363
728	0.0511	-0.0289
729	0.0511	-0.0289
730	0.0511	-0.0289
731	0.04	-0.0356
732	0.04	-0.0356
733	0.04	-0.0356
734	0.0193	-0.0281
735	0.029	-0.0422
736	0.029	-0.0422
737	0.029	-0.0422
738	0.018	-0.0489
739	0.018	-0.0489
740	-0.0027	-0.0415
741	-0.0027	-0.0415
742	-0.0234	-0.034
743	-0.0345	-0.0407
744	-0.0345	-0.0407
745	-0.0455	-0.0474
746	-0.0455	-0.0474
747	-0.0455	-0.0474
748	-0.0455	-0.0474
749	-0.0345	-0.0407
750	-0.0345	-0.0407
751	0.0083	-0.0348
752	0.0083	-0.0348
753	0.04	-0.0356
754	0.04	-0.0356
755	0.0718	-0.0363
756	0.0718	-0.0363
757	0.0828	-0.0297
758	0.0828	-0.0297
759	0.0828	-0.0297
760	0.0828	-0.0297
761	0.0621	-0.0222
762	0.0621	-0.0222
763	0.0511	-0.0289
764	0.0511	-0.0289
765	0.0511	-0.0289
766	0.0511	-0.0289
767	0.04	-0.0356
768	0.04	-0.0356
769	0.04	-0.0356
770	0.04	-0.0356
771	0.04	-0.0356
772	0.04	-0.0356
773	0.04	-0.0356
774	0.029	-0.0422
775	0.0083	-0.0348
776	0.0083	-0.0348
777	0.0083	-0.0348
778	-0.0027	-0.0415
779	-0.0027	-0.0415
780	-0.0027	-0.0415
781	-0.0138	-0.0481
782	-0.0248	-0.0548
783	-0.0359	-0.0614
784	-0.0359	-0.0614
785	-0.0469	-0.0681
786	-0.0469	-0.0681
787	-0.0469	-0.0681
788	-0.0676	-0.0607
789	-0.0786	-0.0673
790	-0.0786	-0.0673
791	-0.0897	-0.074
792	-0.0897	-0.074
793	-0.0897	-0.074
794	-0.1104	-0.0666
795	-0.0786	-0.0673
796	-0.0786	-0.0673
797	-0.0786	-0.0673
798	-0.0359	-0.0614
799	-0.0138	-0.0481
800	-0.0138	-0.0481
801	-0.0138	-0.0481
802	0.0069	-0.0555
803	0.018	-0.0489
804	0.018	-0.0489
805	0.018	-0.0489
806	0.018	-0.0489
807	0.018	-0.0489
808	0.018	-0.0489
809	0.018	-0.0489
810	0.018	-0.0489
811	0.0083	-0.0348
812	0.0083	-0.0348
813	0.0083	-0.0348
814	0.0083	-0.0348
815	0.029	-0.0422
816	0.04	-0.0356
817	0.04	-0.0356
818	0.0304	-0.0215
819	0.0304	-0.0215
820	0.0304	-0.0215
821	0.0304	-0.0215
822	0.0304	-0.0215
823	0.0193	-0.0281
824	0.0193	-0.0281
825	-0.0124	-0.0274
826	-0.0124	-0.0274
827	-0.0234	-0.034
828	-0.0234	-0.034
829	-0.0234	-0.034
830	-0.0345	-0.0407
831	-0.0345	-0.0407
832	-0.0552	-0.0333
833	-0.0759	-0.0258
834	-0.0759	-0.0258
835	-0.0662	-0.0399
836	-0.0662	-0.0399
837	-0.0662	-0.0399
838	-0.0869	-0.0325
839	-0.098	-0.0392
840	-0.098	-0.0392
841	-0.1076	-0.0251
842	-0.1076	-0.0251
843	-0.1076	-0.0251
844	-0.0648	-0.0192
845	-0.0221	-0.0133
846	-0.0221	-0.0133
847	0.0097	-0.0141
848	0.0097	-0.0141
849	0.0207	-0.0074
850	0.0207	-0.0074
851	0.0318	-0.0007
852	0.0318	-0.0007
853	0.0318	-0.0007
854	0.0318	-0.0007
855	0.0318	-0.0007
856	0.0318	-0.0007
857	0.0318	-0.0007
858	0.0318	-0.0007
859	0.0318	-0.0007
860	0.0318	-0.0007
861	0.0318	-0.0007
862	0.0318	-0.0007
863	0.0318	-0.0007
864	0.0318	-0.0007
865	0.0221	0.0133
866	0.0221	0.0133
867	0.0111	0.0067
868	0.0111	0.0067
869	0.0111	0.0067
870	0.0111	0.0067
871	-0.0096	0.0141
872	-0.0096	0.0141
873	-0.0207	0.0075
874	-0.0207	0.0075
875	-0.0207	0.0075
876	-0.0207	0.0075
877	-0.0317	0.0008
878	-0.0317	0.0008
879	-0.0317	0.0008
880	-0.0524	0.0082
881	-0.0524	0.0082
882	-0.0634	0.0016
883	-0.0634	0.0016
884	-0.0841	0.009
885	-0.0841	0.009
886	-0.0634	0.0016
887	-0.0634	0.0016
888	-0.0414	0.0149
889	0.0014	0.0208
890	0.0014	0.0208
891	0.0332	0.02
892	0.0332	0.02
893	0.0649	0.0192
894	0.0649	0.0192
895	0.0552	0.0333
896	0.0552	0.0333
897	0.0552	0.0333
898	0.0649	0.0192
899	0.0442	0.0267
900	0.0442	0.0267
901	0.0442	0.0267
902	0.0442	0.0267
903	0.0442	0.0267
904	0.0442	0.0267
905	0.0442	0.0267
906	0.0442	0.0267
907	0.0442	0.0267
908	0.0442	0.0267
909	0.0442	0.0267
910	0.0442	0.0267
911	0.0235	0.0341
912	0.0235	0.0341
913	0.0235	0.0341
914	0.0332	0.02
915	0.0332	0.02
916	0.0125	0.0274
917	0.0014	0.0208
918	0.0014	0.0208
919	-0.0193	0.0282
920	-0.0193	0.0282
921	-0.0303	0.0215
922	-0.0303	0.0215
923	-0.0414	0.0149
924	-0.0414	0.0149
925	-0.0414	0.0149
926	-0.0414	0.0149
927	-0.0524	0.0082
928	-0.0414	0.0149
929	0.0014	0.0208
930	0.0014	0.0208
931	0.0538	0.0126
932	0.0538	0.0126
933	0.0538	0.0126
934	0.0759	0.0259
935	0.0759	0.0259
936	0.0966	0.0185
937	0.087	0.0326
938	0.087	0.0326
939	0.087	0.0326
940	0.1077	0.0251
941	0.1077	0.0251
942	0.1077	0.0251
943	0.1077	0.0251
944	0.1077	0.0251
945	0.087	0.0326
946	0.087	0.0326
947	0.087	0.0326
948	0.087	0.0326
949	0.087	0.0326
950	0.087	0.0326
951	0.087	0.0326
952	0.087	0.0326
953	0.087	0.0326
954	0.087	0.0326
955	0.0663	0.04
956	0.0663	0.04
957	0.0663	0.04
958	0.0663	0.04
959	0.0552	0.0333
960	0.0552	0.0333
961	0.0552	0.0333
962	0.0345	0.0407
963	0.0345	0.0407
964	0.0345	0.0407
965	0.0345	0.0407
966	0.0235	0.0341
967	0.0028	0.0415
968	0.0028	0.0415
969	0.0028	0.0415
970	0.0028	0.0415
971	0.0456	0.0474
972	0.0456	0.0474
973	0.0773	0.0466
974	0.0773	0.0466
975	0.1091	0.0459
976	0.1091	0.0459
977	0.1201	0.0525
978	0.1201	0.0525
979	0.1201	0.0525
980	0.1311	0.0592
981	0.1518	0.0518
982	0.1518	0.0518
983	0.1422	0.0659
984	0.1422	0.0659
985	0.1422	0.0659
986	0.1629	0.0584
987	0.1532	0.0725
988	0.1532	0.0725
989	0.1532	0.0725
990	0.1532	0.0725
991	0.1643	0.0792
992	0.1643	0.0792
993	0.1643	0.0792
994	0.1643	0.0792
995	0.1643	0.0792
996	0.1643	0.0792
997	0.1546	0.0933
998	0.1546	0.0933
999	0.1546	0.0933
1000	0.1643	0.0792
1001	0.1436	0.0866
1002	0.1436	0.0866
1003	0.1436	0.0866
1004	0.1436	0.0866
1005	0.1215	0.0733
1006	0.0897	0.074
1007	0.0677	0.0607
1008	0.0677	0.0607
1009	0.0677	0.0607
1010	0.0677	0.0607
1011	0.0897	0.074
1012	0.0897	0.074
1013	0.1325	0.0799
1014	0.1325	0.0799
1015	0.1325	0.0799
1016	0.185	0.0718
1017	0.207	0.0851
1018	0.207	0.0851
1019	0.2291	0.0984
1020	0.2291	0.0984
1021	0.2291	0.0984
1022	0.2291	0.0984
1023	0.2402	0.1051
1024	0.2402	0.1051
1025	0.2402	0.1051
1026	0.2402	0.1051
1027	0.2305	0.1191
1028	0.2305	0.1191
1029	0.2305	0.1191
1030	0.2305	0.1191
1031	0.2195	0.1125
1032	0.2195	0.1125
1033	0.2195	0.1125
1034	0.207	0.0851
1035	0.1422	0.0659
1036	0.1422	0.0659
1037	0.098	0.0392
1038	0.098	0.0392
1039	0.098	0.0392
1040	0.0649	0.0192
1041	0.0428	0.0059
1042	0.0428	0.0059
1043	0.0414	-0.0148
1044	0.0414	-0.0148
1045	0.0207	-0.0074
1046	0.0207	-0.0074
1047	0.0525	-0.0082
1048	0.0525	-0.0082
1049	0.0525	-0.0082
1050	0.0842	-0.0089
1051	0.0842	-0.0089
1052	0.0842	-0.0089
1053	0.0842	-0.0089
1054	0.1159	-0.0097
1055	0.1159	-0.0097
1056	0.1366	-0.0171
1057	0.1366	-0.0171
1058	0.127	-0.003
1059	0.127	-0.003
1060	0.1477	-0.0104
1061	0.1477	-0.0104
1062	0.1477	-0.0104
1063	0.1477	-0.0104
1064	0.127	-0.003
1065	0.0952	-0.0023
1066	0.0952	-0.0023
1067	0.0952	-0.0023
1068	0.0952	-0.0023
1069	0.0732	-0.0156
1070	0.029	-0.0422
1071	0.029	-0.0422
1072	-0.1228	-0.094
1073	-0.1228	-0.094
1074	-0.316	-0.1309
1075	-0.316	-0.1309
1076	-0.4222	-0.1352
1077	-0.4222	-0.1352
1078	-0.4623	-0.0997
1079	-0.4388	-0.0656
1080	-0.4388	-0.0656
1081	-0.3836	-0.0323
1082	-0.3836	-0.0323
1083	-0.3408	-0.0264
1084	-0.3408	-0.0264
1085	-0.3408	-0.0264
1086	-0.2442	-0.0079
1087	-0.2442	-0.0079
1088	-0.0814	0.0505
1089	0.1132	0.1081
1090	0.1132	0.1081
1091	0.1132	0.1081
1092	0.265	0.1599
1093	0.363	0.199
1094	0.363	0.199
1095	0.363	0.199
1096	0.3851	0.2124
1097	0.374	0.2057
1098	0.374	0.2057
1099	0.3313	0.1998
1100	0.3313	0.1998
1101	0.3092	0.1865
1102	0.3092	0.1865
1103	0.3092	0.1865
1104	0.2967	0.1591
1105	0.2967	0.1591
1106	0.2636	0.1391
1107	0.2526	0.1325
1108	0.2526	0.1325
1109	0.2636	0.1391
1110	0.2636	0.1391
1111	0.265	0.1599
1112	0.265	0.1599
1113	0.2857	0.1524
1114	0.2857	0.1524
1115	0.2857	0.1524
1116	0.276	0.1665
1117	0.276	0.1665
1118	0.2871	0.1732
1119	0.3202	0.1932
1120	0.3202	0.1932
1121	0.3202	0.1932
1122	0.363	0.199
1123	0.3947	0.1983
1124	0.3947	0.1983
1125	0.4058	0.2049
1126	0.4058	0.2049
1127	0.4168	0.2116
1128	0.4168	0.2116
1129	0.4154	0.1909
1130	0.4154	0.1909
1131	0.3713	0.1642
1132	0.3713	0.1642
1133	0.3064	0.145
1134	0.3064	0.145
1135	0.3064	0.145
1136	0.2733	0.125
1137	0.2719	0.1043
1138	0.2719	0.1043
1139	0.2609	0.0976
1140	0.2609	0.0976
1141	0.2609	0.0976
1142	0.2609	0.0976
1143	0.2195	0.1125
1144	0.2291	0.0984
1145	0.2291	0.0984
1146	0.2195	0.1125
1147	0.2195	0.1125
1148	0.2195	0.1125
1149	0.2195	0.1125
1150	0.2195	0.1125
1151	0.1877	0.1132
1152	0.1656	0.0999
1153	0.1546	0.0933
1154	0.1546	0.0933
1155	0.1546	0.0933
1156	0.1863	0.0925
1157	0.2402	0.1051
1158	0.2402	0.1051
1159	0.2402	0.1051
1160	0.2843	0.1317
1161	0.3271	0.1376
1162	0.3271	0.1376
1163	0.3271	0.1376
1164	0.3588	0.1368
1165	0.3588	0.1368
1166	0.3588	0.1368
1167	0.3381	0.1442
1168	0.3381	0.1442
1169	0.3381	0.1442
1170	0.3381	0.1442
1171	0.3381	0.1442
1172	0.3381	0.1442
1173	0.3492	0.1509
1174	0.3713	0.1642
1175	0.3837	0.1916
1176	0.3837	0.1916
1177	0.3837	0.1916
1178	0.4058	0.2049
1179	0.4278	0.2183
1180	0.4278	0.2183
1181	0.4278	0.2183
1182	0.4278	0.2183
1183	0.4499	0.2316
1184	0.461	0.2382
1185	0.461	0.2382
1186	0.461	0.2382
1187	0.461	0.2382
1188	0.4403	0.2457
1189	0.4085	0.2464
1190	0.4182	0.2323
1191	0.4182	0.2323
1192	0.4182	0.2323
1193	0.4085	0.2464
1194	0.4085	0.2464
1195	0.4513	0.2523
1196	0.4513	0.2523
1197	0.4941	0.2582
1198	0.4941	0.2582
1199	0.5369	0.2641
1200	0.5369	0.2641
1201	0.5369	0.2641
1202	0.559	0.2774
1203	0.581	0.2908
1204	0.581	0.2908
1205	0.6031	0.3041
1206	0.6031	0.3041
1207	0.6252	0.3174
1208	0.6252	0.3174
1209	0.6252	0.3174
1210	0.6362	0.3241
1211	0.6362	0.3241
1212	0.6252	0.3174
1213	0.6045	0.3248
1214	0.6045	0.3248
1215	0.6142	0.3107
1216	0.6142	0.3107
1217	0.6031	0.3041
1218	0.6031	0.3041
1219	0.5921	0.2974
1220	0.5921	0.2974
1221	0.5824	0.3115
1222	0.5824	0.3115
1223	0.5824	0.3115
1224	0.5824	0.3115
1225	0.5824	0.3115
1226	0.5617	0.3189
1227	0.5507	0.3123
1228	0.5507	0.3123
1229	0.5396	0.3056
1230	0.5396	0.3056
1231	0.5079	0.3064
1232	0.5079	0.3064
1233	0.4969	0.2997
1234	0.4969	0.2997
1235	0.4858	0.293
1236	0.4858	0.293
1237	0.4748	0.2864
1238	0.4748	0.2864
1239	0.4637	0.2797
1240	0.4637	0.2797
1241	0.4637	0.2797
1242	0.4844	0.2723
1243	0.4844	0.2723
1244	0.5051	0.2649
1245	0.5051	0.2649
1246	0.5369	0.2641
1247	0.559	0.2774
1248	0.559	0.2774
1249	0.57	0.2841
1250	0.57	0.2841
1251	0.57	0.2841
1252	0.57	0.2841
1253	0.57	0.2841
1254	0.5493	0.2915
1255	0.5493	0.2915
1256	0.5493	0.2915
1257	0.57	0.2841
1258	0.57	0.2841
1259	0.57	0.2841
1260	0.5603	0.2982
1261	0.5714	0.3048
1262	0.5714	0.3048
1263	0.5714	0.3048
1264	0.5714	0.3048
1265	0.5507	0.3123
1266	0.5507	0.3123
1267	0.5507	0.3123
1268	0.5507	0.3123
1269	0.5507	0.3123
1270	0.5603	0.2982
1271	0.5396	0.3056
1272	0.5396	0.3056
1273	0.5189	0.313
1274	0.5189	0.313
1275	0.5079	0.3064
1276	0.5079	0.3064
1277	0.4969	0.2997
1278	0.4872	0.3138
1279	0.4872	0.3138
1280	0.4872	0.3138
1281	0.5189	0.313
1282	0.5189	0.313
1283	0.5714	0.3048
1284	0.5714	0.3048
1285	0.5728	0.3256
1286	0.5728	0.3256
1287	0.5728	0.3256
1288	0.6142	0.3107
1289	0.6045	0.3248
1290	0.6045	0.3248
1291	0.6045	0.3248
1292	0.6045	0.3248
1293	0.5935	0.3182
1294	0.5935	0.3182
1295	0.5935	0.3182
1296	0.5935	0.3182
1297	0.5728	0.3256
1298	0.5728	0.3256
1299	0.5728	0.3256
1300	0.5728	0.3256
1301	0.5824	0.3115
1302	0.5824	0.3115
1303	0.5824	0.3115
1304	0.5617	0.3189
1305	0.5617	0.3189
1306	0.5617	0.3189
1307	0.5617	0.3189
1308	0.5617	0.3189
1309	0.5507	0.3123
1310	0.5507	0.3123
1311	0.5507	0.3123
1312	0.5396	0.3056
1313	0.5396	0.3056
1314	0.5396	0.3056
1315	0.5189	0.313
1316	0.5189	0.313
1317	0.5189	0.313
1318	0.53	0.3197
1319	0.53	0.3197
1320	0.5824	0.3115
1321	0.5824	0.3115
1322	0.5824	0.3115
1323	0.5824	0.3115
1324	0.6142	0.3107
1325	0.6252	0.3174
1326	0.6252	0.3174
1327	0.6459	0.31
1328	0.6459	0.31
1329	0.6459	0.31
1330	0.6459	0.31
1331	0.6459	0.31
1332	0.6459	0.31
1333	0.6252	0.3174
1334	0.6252	0.3174
1335	0.6252	0.3174
1336	0.6252	0.3174
1337	0.6252	0.3174
1338	0.6252	0.3174
1339	0.6362	0.3241
1340	0.6362	0.3241
1341	0.6252	0.3174
1342	0.6252	0.3174
1343	0.6252	0.3174
1344	0.6252	0.3174
1345	0.6045	0.3248
1346	0.6045	0.3248
1347	0.6142	0.3107
1348	0.5935	0.3182
1349	0.5935	0.3182
1350	0.5935	0.3182
1351	0.5935	0.3182
1352	0.5824	0.3115
1353	0.5617	0.3189
1354	0.5617	0.3189
1355	0.5507	0.3123
1356	0.5507	0.3123
1357	0.53	0.3197
1358	0.53	0.3197
1359	0.5189	0.313
1360	0.5189	0.313
1361	0.53	0.3197
1362	0.53	0.3197
1363	0.5728	0.3256
1364	0.5728	0.3256
1365	0.6252	0.3174
1366	0.6252	0.3174
1367	0.6569	0.3166
1368	0.6569	0.3166
1369	0.668	0.3233
1370	0.668	0.3233
1371	0.668	0.3233
1372	0.668	0.3233
1373	0.6473	0.3307
1374	0.6473	0.3307
1375	0.6473	0.3307
1376	0.6473	0.3307
1377	0.6569	0.3166
1378	0.6569	0.3166
1379	0.6569	0.3166
1380	0.6473	0.3307
1381	0.6473	0.3307
1382	0.6473	0.3307
1383	0.6473	0.3307
1384	0.6473	0.3307
1385	0.6362	0.3241
1386	0.6362	0.3241
1387	0.6362	0.3241
1388	0.6362	0.3241
1389	0.6155	0.3315
1390	0.6155	0.3315
1391	0.6045	0.3248
1392	0.6045	0.3248
1393	0.6045	0.3248
1394	0.6045	0.3248
1395	0.5838	0.3322
1396	0.5838	0.3322
1397	0.5935	0.3182
1398	0.5728	0.3256
1399	0.5728	0.3256
1400	0.5728	0.3256
1401	0.5521	0.333
1402	0.5521	0.333
1403	0.541	0.3263
1404	0.541	0.3263
1405	0.53	0.3197
1406	0.53	0.3197
1407	0.5093	0.3271
1408	0.5093	0.3271
1409	0.5093	0.3271
1410	0.5203	0.3338
1411	0.5728	0.3256
1412	0.5948	0.3389
1413	0.5948	0.3389
1414	0.5948	0.3389
1415	0.6266	0.3381
1416	0.6473	0.3307
1417	0.6473	0.3307
1418	0.6473	0.3307
1419	0.6473	0.3307
1420	0.6473	0.3307
1421	0.6473	0.3307
1422	0.6473	0.3307
1423	0.6473	0.3307
1424	0.6473	0.3307
1425	0.6266	0.3381
1426	0.6266	0.3381
1427	0.6266	0.3381
1428	0.6266	0.3381
1429	0.6266	0.3381
1430	0.6266	0.3381
1431	0.6266	0.3381
1432	0.6266	0.3381
1433	0.6266	0.3381
1434	0.6266	0.3381
1435	0.6059	0.3456
1436	0.6059	0.3456
1437	0.6059	0.3456
1438	0.6059	0.3456
1439	0.6059	0.3456
1440	0.6059	0.3456
1441	0.5948	0.3389
1442	0.5948	0.3389
1443	0.5741	0.3463
1444	0.5741	0.3463
1445	0.5631	0.3397
1446	0.5631	0.3397
1447	0.5424	0.3471
1448	0.5424	0.3471
1449	0.5107	0.3478
1450	0.5107	0.3478
1451	0.5107	0.3478
1452	0.5107	0.3478
1453	0.5424	0.3471
1454	0.5424	0.3471
1455	0.5424	0.3471
1456	0.5424	0.3471
1457	0.5741	0.3463
1458	0.6059	0.3456
1459	0.6266	0.3381
1460	0.6266	0.3381
1461	0.6266	0.3381
1462	0.6266	0.3381
1463	0.6059	0.3456
1464	0.6059	0.3456
1465	0.6059	0.3456
1466	0.6155	0.3315
1467	0.5948	0.3389
1468	0.5948	0.3389
1469	0.5948	0.3389
1470	0.5741	0.3463
1471	0.5741	0.3463
1472	0.5741	0.3463
1473	0.5838	0.3322
1474	0.5838	0.3322
1475	0.5838	0.3322
1476	0.5631	0.3397
1477	0.5631	0.3397
1478	0.5631	0.3397
1479	0.5521	0.333
1480	0.5521	0.333
1481	0.5521	0.333
1482	0.5617	0.3189
1483	0.5203	0.3338
1484	0.5203	0.3338
1485	0.5093	0.3271
1486	0.5093	0.3271
1487	0.4872	0.3138
1488	0.4872	0.3138
1489	0.4762	0.3071
1490	0.4762	0.3071
1491	0.4858	0.293
1492	0.4858	0.293
1493	0.5176	0.2923
1494	0.5383	0.2849
1495	0.5383	0.2849
1496	0.5383	0.2849
1497	0.5479	0.2708
1498	0.5479	0.2708
1499	0.5479	0.2708
1500	0.5479	0.2708
1501	0.5369	0.2641
1502	0.5369	0.2641
1503	0.5465	0.25
1504	0.5258	0.2575
1505	0.5258	0.2575
1506	0.5258	0.2575
1507	0.5148	0.2508
1508	0.5148	0.2508
1509	0.5148	0.2508
1510	0.5148	0.2508
1511	0.4941	0.2582
1512	0.4941	0.2582
1513	0.4831	0.2516
1514	0.4831	0.2516
1515	0.4927	0.2375
1516	0.4927	0.2375
1517	0.472	0.2449
1518	0.472	0.2449
1519	0.461	0.2382
1520	0.461	0.2382
1521	0.461	0.2382
1522	0.4499	0.2316
1523	0.4389	0.2249
1524	0.4389	0.2249
1525	0.4389	0.2249
1526	0.4182	0.2323
1527	0.4072	0.2257
1528	0.4072	0.2257
1529	0.3961	0.219
1530	0.3961	0.219
1531	0.3865	0.2331
1532	0.3865	0.2331
1533	0.4182	0.2323
1534	0.4182	0.2323
1535	0.461	0.2382
1536	0.461	0.2382
1537	0.4927	0.2375
1538	0.4927	0.2375
1539	0.5037	0.2441
1540	0.5037	0.2441
1541	0.5244	0.2367
1542	0.5244	0.2367
1543	0.5148	0.2508
1544	0.5148	0.2508
1545	0.5148	0.2508
1546	0.5148	0.2508
1547	0.5148	0.2508
1548	0.5148	0.2508
1549	0.5148	0.2508
1550	0.5148	0.2508
1551	0.5258	0.2575
1552	0.5258	0.2575
1553	0.5258	0.2575
1554	0.5258	0.2575
1555	0.5258	0.2575
1556	0.5258	0.2575
1557	0.5162	0.2715
1558	0.5162	0.2715
1559	0.4955	0.279
1560	0.4955	0.279
1561	0.4955	0.279
1562	0.4844	0.2723
1563	0.4844	0.2723
1564	0.4844	0.2723
1565	0.4734	0.2656
1566	0.4527	0.2731
1567	0.4527	0.2731
1568	0.4527	0.2731
1569	0.4417	0.2664
1570	0.4417	0.2664
1571	0.421	0.2738
1572	0.421	0.2738
1573	0.4306	0.2597
1574	0.4306	0.2597
1575	0.421	0.2738
1576	0.421	0.2738
1577	0.4527	0.2731
1578	0.4527	0.2731
1579	0.4955	0.279
1580	0.4955	0.279
1581	0.5272	0.2782
1582	0.5272	0.2782
1583	0.5383	0.2849
1584	0.5383	0.2849
1585	0.5383	0.2849
1586	0.5383	0.2849
1587	0.5383	0.2849
1588	0.5383	0.2849
1589	0.5176	0.2923
1590	0.5272	0.2782
1591	0.5272	0.2782
1592	0.5272	0.2782
1593	0.5176	0.2923
1594	0.5176	0.2923
1595	0.5176	0.2923
1596	0.5176	0.2923
1597	0.5176	0.2923
1598	0.5176	0.2923
1599	0.5176	0.2923
1600	0.5176	0.2923
1601	0.5176	0.2923
1602	0.5176	0.2923
1603	0.4969	0.2997
1604	0.4969	0.2997
1605	0.4969	0.2997
1606	0.4969	0.2997
1607	0.4858	0.293
1608	0.4651	0.3005
1609	0.4748	0.2864
1610	0.4748	0.2864
1611	0.4541	0.2938
1612	0.4541	0.2938
1613	0.4224	0.2946
1614	0.4224	0.2946
1615	0.4224	0.2946
1616	0.4224	0.2946
1617	0.443	0.2871
1618	0.443	0.2871
1619	0.443	0.2871
1620	0.443	0.2871
1621	0.4748	0.2864
1622	0.4969	0.2997
1623	0.5286	0.2989
1624	0.5286	0.2989
1625	0.5493	0.2915
1626	0.5396	0.3056
1627	0.5396	0.3056
1628	0.5396	0.3056
1629	0.5493	0.2915
1630	0.5493	0.2915
1631	0.5286	0.2989
1632	0.5286	0.2989
1633	0.5176	0.2923
1634	0.5176	0.2923
1635	0.5176	0.2923
1636	0.5176	0.2923
1637	0.5176	0.2923
1638	0.5176	0.2923
1639	0.5176	0.2923
1640	0.5176	0.2923
1641	0.5176	0.2923
1642	0.5176	0.2923
1643	0.4969	0.2997
1644	0.4969	0.2997
1645	0.4858	0.293
1646	0.4858	0.293
1647	0.4651	0.3005
1648	0.4651	0.3005
1649	0.4541	0.2938
1650	0.4541	0.2938
1651	0.443	0.2871
1652	0.443	0.2871
1653	0.432	0.2805
1654	0.432	0.2805
1655	0.4113	0.2879
1656	0.4113	0.2879
1657	0.4003	0.2812
1658	0.4003	0.2812
1659	0.4003	0.2812
1660	0.421	0.2738
1661	0.443	0.2871
1662	0.443	0.2871
1663	0.4955	0.279
1664	0.5272	0.2782
1665	0.5272	0.2782
1666	0.5272	0.2782
1667	0.5383	0.2849
1668	0.5383	0.2849
1669	0.5286	0.2989
1670	0.5286	0.2989
1671	0.5286	0.2989
1672	0.5286	0.2989
1673	0.5286	0.2989
1674	0.5286	0.2989
1675	0.5383	0.2849
1676	0.5383	0.2849
1677	0.5176	0.2923
1678	0.5176	0.2923
1679	0.5176	0.2923
1680	0.5176	0.2923
1681	0.5176	0.2923
1682	0.5176	0.2923
1683	0.5176	0.2923
1684	0.5176	0.2923
1685	0.5065	0.2856
1686	0.5065	0.2856
1687	0.5065	0.2856
1688	0.5065	0.2856
1689	0.4858	0.293
1690	0.4748	0.2864
1691	0.4748	0.2864
1692	0.4748	0.2864
1693	0.4748	0.2864
1694	0.4637	0.2797
1695	0.4637	0.2797
1696	0.443	0.2871
1697	0.432	0.2805
1698	0.432	0.2805
1699	0.421	0.2738
1700	0.421	0.2738
1701	0.4003	0.2812
1702	0.4003	0.2812
1703	0.3892	0.2746
1704	0.3892	0.2746
1705	0.3782	0.2679
1706	0.3782	0.2679
1707	0.3671	0.2613
1708	0.3671	0.2613
1709	0.3671	0.2613
1710	0.3782	0.2679
1711	0.421	0.2738
1712	0.421	0.2738
1713	0.4637	0.2797
1714	0.4637	0.2797
1715	0.4637	0.2797
1716	0.4955	0.279
1717	0.5065	0.2856
1718	0.5065	0.2856
1719	0.5065	0.2856
1720	0.5065	0.2856
1721	0.4969	0.2997
1722	0.4969	0.2997
1723	0.4969	0.2997
1724	0.5176	0.2923
1725	0.5176	0.2923
1726	0.5176	0.2923
1727	0.5079	0.3064
1728	0.5079	0.3064
1729	0.5079	0.3064
1730	0.5079	0.3064
1731	0.5079	0.3064
1732	0.5079	0.3064
1733	0.5079	0.3064
1734	0.5079	0.3064
1735	0.5079	0.3064
1736	0.5079	0.3064
1737	0.5079	0.3064
1738	0.5079	0.3064
1739	0.4872	0.3138
1740	0.4872	0.3138
1741	0.4872	0.3138
1742	0.4872	0.3138
1743	0.4762	0.3071
1744	0.4762	0.3071
1745	0.4762	0.3071
1746	0.4762	0.3071
1747	0.4555	0.3145
1748	0.4555	0.3145
1749	0.4444	0.3079
1750	0.4444	0.3079
1751	0.4334	0.3012
1752	0.4334	0.3012
1753	0.4334	0.3012
1754	0.4127	0.3087
1755	0.4127	0.3087
1756	0.4237	0.3153
1757	0.4762	0.3071
1758	0.4762	0.3071
1759	0.5079	0.3064
1760	0.5079	0.3064
1761	0.53	0.3197
1762	0.53	0.3197
1763	0.541	0.3263
1764	0.541	0.3263
1765	0.5617	0.3189
1766	0.5617	0.3189
1767	0.5617	0.3189
1768	0.541	0.3263
1769	0.541	0.3263
1770	0.5203	0.3338
1771	0.5203	0.3338
1772	0.5203	0.3338
1773	0.53	0.3197
1774	0.53	0.3197
1775	0.53	0.3197
1776	0.53	0.3197
1777	0.53	0.3197
1778	0.53	0.3197
1779	0.5093	0.3271
1780	0.5093	0.3271
1781	0.5189	0.313
1782	0.5189	0.313
1783	0.4982	0.3204
1784	0.4982	0.3204
1785	0.4872	0.3138
1786	0.4872	0.3138
1787	0.4872	0.3138
1788	0.4762	0.3071
1789	0.4651	0.3005
1790	0.4651	0.3005
1791	0.4444	0.3079
1792	0.4444	0.3079
1793	0.4334	0.3012
1794	0.4334	0.3012
1795	0.4017	0.302
1796	0.4017	0.302
1797	0.3906	0.2953
1798	0.3906	0.2953
1799	0.3906	0.2953
1800	0.3906	0.2953
1801	0.4224	0.2946
1802	0.4224	0.2946
1803	0.4651	0.3005
1804	0.4651	0.3005
1805	0.5176	0.2923
1806	0.5176	0.2923
1807	0.5189	0.313
1808	0.5189	0.313
1809	0.5396	0.3056
1810	0.53	0.3197
1811	0.53	0.3197
1812	0.53	0.3197
1813	0.53	0.3197
1814	0.53	0.3197
1815	0.53	0.3197
1816	0.53	0.3197
1817	0.53	0.3197
1818	0.5203	0.3338
1819	0.541	0.3263
1820	0.541	0.3263
1821	0.5314	0.3404
1822	0.5314	0.3404
1823	0.5521	0.333
1824	0.5521	0.333
1825	0.5521	0.333
1826	0.5521	0.333
1827	0.5424	0.3471
1828	0.5424	0.3471
1829	0.5424	0.3471
1830	0.5424	0.3471
1831	0.5424	0.3471
1832	0.5424	0.3471
1833	0.5217	0.3545
1834	0.5217	0.3545
1835	0.5217	0.3545
1836	0.5217	0.3545
1837	0.501	0.3619
1838	0.501	0.3619
1839	0.49	0.3553
1840	0.49	0.3553
1841	0.4789	0.3486
1842	0.4679	0.3419
1843	0.4679	0.3419
1844	0.4679	0.3419
1845	0.4472	0.3494
1846	0.4472	0.3494
1847	0.4472	0.3494
1848	0.4789	0.3486
1849	0.501	0.3619
1850	0.501	0.3619
1851	0.5535	0.3537
1852	0.5535	0.3537
1853	0.5645	0.3604
1854	0.5645	0.3604
1855	0.5755	0.3671
1856	0.5755	0.3671
1857	0.5866	0.3737
1858	0.5866	0.3737
1859	0.5659	0.3811
1860	0.5659	0.3811
1861	0.5755	0.3671
1862	0.5755	0.3671
1863	0.5548	0.3745
1864	0.5548	0.3745
1865	0.5548	0.3745
1866	0.5548	0.3745
1867	0.5645	0.3604
1868	0.5645	0.3604
1869	0.5645	0.3604
1870	0.5645	0.3604
1871	0.5535	0.3537
1872	0.5535	0.3537
1873	0.5328	0.3612
1874	0.5328	0.3612
1875	0.5328	0.3612
1876	0.5217	0.3545
1877	0.501	0.3619
1878	0.501	0.3619
1879	0.5107	0.3478
1880	0.5107	0.3478
1881	0.4996	0.3412
1882	0.4996	0.3412
1883	0.4996	0.3412
1884	0.4789	0.3486
1885	0.4582	0.356
1886	0.4582	0.356
1887	0.4472	0.3494
1888	0.4472	0.3494
1889	0.4472	0.3494
1890	0.4472	0.3494
1891	0.4582	0.356
1892	0.4582	0.356
1893	0.501	0.3619
1894	0.501	0.3619
1895	0.5328	0.3612
1896	0.5328	0.3612
1897	0.5645	0.3604
1898	0.5645	0.3604
1899	0.5755	0.3671
1900	0.5755	0.3671
1901	0.5755	0.3671
1902	0.5755	0.3671
1903	0.5755	0.3671
1904	0.5548	0.3745
1905	0.5548	0.3745
1906	0.5341	0.3819
1907	0.5341	0.3819
1908	0.5341	0.3819
1909	0.5341	0.3819
1910	0.5341	0.3819
1911	0.5548	0.3745
1912	0.5548	0.3745
1913	0.5548	0.3745
1914	0.5548	0.3745
1915	0.5341	0.3819
1916	0.5341	0.3819
1917	0.5438	0.3678
1918	0.5438	0.3678
1919	0.5328	0.3612
1920	0.5121	0.3686
1921	0.5121	0.3686
1922	0.5121	0.3686
1923	0.5121	0.3686
1924	0.5121	0.3686
1925	0.5121	0.3686
1926	0.501	0.3619
1927	0.4693	0.3627
1928	0.4582	0.356
1929	0.4472	0.3494
1930	0.4472	0.3494
1931	0.4569	0.3353
1932	0.4569	0.3353
1933	0.4789	0.3486
1934	0.4789	0.3486
1935	0.5314	0.3404
1936	0.5314	0.3404
1937	0.5535	0.3537
1938	0.5535	0.3537
1939	0.5535	0.3537
1940	0.5645	0.3604
1941	0.5852	0.353
1942	0.5852	0.353
1943	0.5852	0.353
1944	0.5852	0.353
1945	0.5852	0.353
1946	0.5852	0.353
1947	0.5852	0.353
1948	0.5852	0.353
1949	0.5755	0.3671
1950	0.5755	0.3671
1951	0.5755	0.3671
1952	0.5755	0.3671
1953	0.5755	0.3671
1954	0.5755	0.3671
1955	0.5852	0.353
1956	0.5852	0.353
1957	0.5645	0.3604
1958	0.5645	0.3604
1959	0.5438	0.3678
1960	0.5438	0.3678
1961	0.5438	0.3678
1962	0.5535	0.3537
1963	0.5328	0.3612
1964	0.5328	0.3612
1965	0.5217	0.3545
1966	0.5217	0.3545
1967	0.5217	0.3545
1968	0.5107	0.3478
1969	0.49	0.3553
1970	0.49	0.3553
1971	0.4789	0.3486
1972	0.4789	0.3486
1973	0.4582	0.356
1974	0.4582	0.356
1975	0.4582	0.356
1976	0.4472	0.3494
1977	0.4789	0.3486
1978	0.4789	0.3486
1979	0.4789	0.3486
1980	0.5217	0.3545
1981	0.5645	0.3604
1982	0.5645	0.3604
1983	0.5962	0.3596
1984	0.5962	0.3596
1985	0.6073	0.3663
1986	0.6073	0.3663
1987	0.6183	0.373
1988	0.6183	0.373
1989	0.6183	0.373
1990	0.6183	0.373
1991	0.6183	0.373
1992	0.6183	0.373
1993	0.6183	0.373
1994	0.6183	0.373
1995	0.6087	0.387
1996	0.6294	0.3796
1997	0.6404	0.3863
1998	0.6404	0.3863
1999	0.6307	0.4004
2000	0.6307	0.4004
2001	0.6404	0.3863
2002	0.6404	0.3863
2003	0.6197	0.3937
2004	0.6197	0.3937
2005	0.6087	0.387
2006	0.6087	0.387
2007	0.588	0.3945
2008	0.588	0.3945
2009	0.588	0.3945
2010	0.588	0.3945
2011	0.5783	0.4085
2012	0.5783	0.4085
2013	0.5783	0.4085
2014	0.5783	0.4085
2015	0.5783	0.4085
2016	0.5576	0.416
2017	0.5576	0.416
2018	0.5576	0.416
2019	0.5576	0.416
2020	0.5576	0.416
2021	0.5783	0.4085
2022	0.5783	0.4085
2023	0.6211	0.4144
2024	0.6211	0.4144
2025	0.6211	0.4144
2026	0.6639	0.4203
2027	0.6749	0.427
2028	0.6749	0.427
2029	0.7066	0.4262
2030	0.697	0.4403
2031	0.697	0.4403
2032	0.697	0.4403
2033	0.697	0.4403
2034	0.697	0.4403
2035	0.6859	0.4337
2036	0.6859	0.4337
2037	0.6859	0.4337
2038	0.6859	0.4337
2039	0.6859	0.4337
2040	0.6859	0.4337
2041	0.6652	0.4411
2042	0.6652	0.4411
2043	0.6652	0.4411
2044	0.6652	0.4411
2045	0.6652	0.4411
2046	0.6652	0.4411
2047	0.6652	0.4411
2048	0.6652	0.4411
2049	0.6652	0.4411
[truncated: 39,951 more rows]
