# Supplementary material for: Gender-Related Effect in Oxygenation Dynamics by Using Far-Infrared Intervention with Near-Infrared Spectroscopy Measurement: A Gender Differences Controlled Trial
Source: PLoS One. 2015 Nov 10;10(11):e0135166. doi: 10.1371/journal.pone.0135166 (PMC4640828; doi:10.1371/journal.pone.0135166)
Supplement: S21 File — (XLSX) [file pone.0135166.s021.xlsx]

## Sheet: 工作表1
50	-0.2018	0.0073
51	-0.2018	0.0073
52	-0.1913	0.0143
53	-0.1808	0.0212
54	-0.1703	0.0282
55	-0.14	0.0282
56	-0.1202	0.0211
57	-0.1097	0.0281
58	-0.0899	0.0211
59	-0.0899	0.0211
60	-0.0794	0.0281
61	-0.0794	0.0281
62	-0.0794	0.0281
63	-0.0794	0.0281
64	-0.07	0.0141
65	-0.07	0.0141
66	-0.07	0.0141
67	-0.0899	0.0211
68	-0.0899	0.0211
69	-0.0805	0.0071
70	-0.0805	0.0071
71	-0.1003	0.0141
72	-0.1003	0.0141
73	-0.091	0.0001
74	-0.091	0.0001
75	-0.0711	-0.0069
76	-0.0711	-0.0069
77	-0.091	0.0001
78	-0.091	0.0001
79	-0.091	0.0001
80	-0.091	0.0001
81	-0.091	0.0001
82	-0.091	0.0001
83	-0.091	0.0001
84	-0.091	0.0001
85	-0.091	0.0001
86	-0.091	0.0001
87	-0.091	0.0001
88	-0.1003	0.0141
89	-0.1003	0.0141
90	-0.1003	0.0141
91	-0.0805	0.0071
92	-0.0899	0.0211
93	-0.0899	0.0211
94	-0.0794	0.0281
95	-0.0595	0.0211
96	-0.0491	0.028
97	-0.0292	0.021
98	-0.0187	0.028
99	0.0011	0.021
100	0.0011	0.021
101	0.0011	0.021
102	0.0011	0.021
103	0.0011	0.021
104	0.0105	0.007
105	0.0105	0.007
106	0.0105	0.007
107	0.0105	0.007
108	0	0
109	0	0
110	0	0
111	-0.0198	0.007
112	-0.0105	-0.0069
113	-0.0105	-0.0069
114	-0.0105	-0.0069
115	-0.0105	-0.0069
116	-0.0105	-0.0069
117	-0.0105	-0.0069
118	-0.0105	-0.0069
119	-0.0105	-0.0069
120	-0.0105	-0.0069
121	-0.0105	-0.0069
122	-0.0105	-0.0069
123	-0.0105	-0.0069
124	-0.0303	0.0001
125	-0.0209	-0.0139
126	-0.0408	-0.0069
127	-0.0408	-0.0069
128	-0.0408	-0.0069
129	-0.0314	-0.0209
130	-0.0408	-0.0069
131	-0.0408	-0.0069
132	-0.0408	-0.0069
133	-0.0408	-0.0069
134	-0.0303	0.0001
135	-0.0105	-0.0069
136	0	0
137	0.0198	-0.007
138	0.0303	0
139	0.0303	0
140	0.0502	-0.007
141	0.0502	-0.007
142	0.0502	-0.007
143	0.0502	-0.007
144	0.0502	-0.007
145	0.0502	-0.007
146	0.0595	-0.021
147	0.0397	-0.014
148	0.0397	-0.014
149	0.0397	-0.014
150	0.0397	-0.014
151	0.0491	-0.028
152	0.0491	-0.028
153	0.0491	-0.028
154	0.0491	-0.028
155	0.0292	-0.021
156	0.0292	-0.021
157	0.0292	-0.021
158	0.0386	-0.0349
159	0.0187	-0.0279
160	0.0187	-0.0279
161	0.0281	-0.0419
162	0.0083	-0.0349
163	-0.0116	-0.0279
164	-0.0022	-0.0419
165	-0.0022	-0.0419
166	-0.0022	-0.0419
167	-0.0022	-0.0419
168	-0.0022	-0.0419
169	-0.0116	-0.0279
170	-0.0011	-0.0209
171	0.0292	-0.021
172	0.0397	-0.014
173	0.0595	-0.021
174	0.07	-0.014
175	0.07	-0.014
176	0.0805	-0.0071
177	0.0805	-0.0071
178	0.1003	-0.0141
179	0.1003	-0.0141
180	0.1003	-0.0141
181	0.1003	-0.0141
182	0.1003	-0.0141
183	0.0899	-0.021
184	0.0899	-0.021
185	0.0899	-0.021
186	0.0992	-0.035
187	0.0794	-0.028
188	0.0794	-0.028
189	0.0689	-0.035
190	0.0689	-0.035
191	0.0783	-0.049
192	0.0584	-0.042
193	0.0584	-0.042
194	0.0678	-0.0559
195	0.0678	-0.0559
196	0.0678	-0.0559
197	0.048	-0.0489
198	0.048	-0.0489
199	0.048	-0.0489
200	0.048	-0.0489
201	0.0386	-0.0349
202	0.0386	-0.0349
203	0.0584	-0.042
204	0.0689	-0.035
205	0.0794	-0.028
206	0.0992	-0.035
207	0.1097	-0.0281
208	0.1097	-0.0281
209	0.1295	-0.0351
210	0.1295	-0.0351
211	0.1295	-0.0351
212	0.1295	-0.0351
213	0.1389	-0.0491
214	0.1191	-0.042
215	0.1191	-0.042
216	0.1191	-0.042
217	0.1284	-0.056
218	0.1284	-0.056
219	0.1086	-0.049
220	0.118	-0.063
221	0.118	-0.063
222	0.0981	-0.056
223	0.0981	-0.056
224	0.0981	-0.056
225	0.1075	-0.07
226	0.0981	-0.056
227	0.0981	-0.056
228	0.1075	-0.07
229	0.0876	-0.063
230	0.0876	-0.063
231	0.0772	-0.0699
232	0.0772	-0.0699
233	0.0667	-0.0769
234	0.0364	-0.0769
235	0.0259	-0.0838
236	0.0154	-0.0908
237	0.0154	-0.0908
238	0.0154	-0.0908
239	0.0353	-0.0978
240	0.0446	-0.1118
241	0.0645	-0.1188
242	0.0645	-0.1188
243	0.0645	-0.1188
244	0.0446	-0.1118
245	0.0645	-0.1188
246	0.0645	-0.1188
247	0.0645	-0.1188
248	0.0645	-0.1188
249	0.075	-0.1118
250	0.075	-0.1118
251	0.0645	-0.1188
252	0.0645	-0.1188
253	0.0645	-0.1188
254	0.054	-0.1258
255	0.0435	-0.1327
256	0.0331	-0.1397
257	0.0027	-0.1397
258	-0.0077	-0.1466
259	-0.0182	-0.1536
260	-0.0287	-0.1606
261	-0.0287	-0.1606
262	-0.0287	-0.1606
263	-0.0287	-0.1606
264	-0.0182	-0.1536
265	0.0016	-0.1606
266	-0.0077	-0.1466
267	-0.0077	-0.1466
268	0.0027	-0.1397
269	0.0027	-0.1397
270	0.0027	-0.1397
271	0.0027	-0.1397
272	-0.0066	-0.1257
273	0.0132	-0.1327
274	0.0237	-0.1257
275	0.0342	-0.1188
276	0.054	-0.1258
277	0.0645	-0.1188
278	0.0645	-0.1188
279	0.0843	-0.1258
280	0.0843	-0.1258
281	0.0843	-0.1258
282	0.0843	-0.1258
283	0.0843	-0.1258
284	0.0843	-0.1258
285	0.0937	-0.1398
286	0.0937	-0.1398
287	0.0937	-0.1398
288	0.0937	-0.1398
289	0.0937	-0.1398
290	0.0937	-0.1398
291	0.0843	-0.1258
292	0.0843	-0.1258
293	0.0843	-0.1258
294	0.0843	-0.1258
295	0.0843	-0.1258
296	0.0843	-0.1258
297	0.0843	-0.1258
298	0.0739	-0.1328
299	0.0634	-0.1398
300	0.0529	-0.1467
301	0.0424	-0.1537
302	0.0121	-0.1537
303	0.0016	-0.1606
304	-0.0088	-0.1676
305	-0.0193	-0.1746
306	-0.0193	-0.1746
307	-0.0298	-0.1815
308	-0.0496	-0.1745
309	-0.0601	-0.1815
310	-0.0507	-0.1955
311	-0.0507	-0.1955
312	-0.0601	-0.1815
313	-0.0403	-0.1885
314	-0.0193	-0.1746
315	0.011	-0.1746
316	0.0215	-0.1676
317	0.0518	-0.1677
318	0.0623	-0.1607
319	0.0728	-0.1537
320	0.0728	-0.1537
321	0.0926	-0.1608
322	0.0926	-0.1608
323	0.0832	-0.1468
324	0.0926	-0.1608
325	0.0728	-0.1537
326	0.0821	-0.1677
327	0.0623	-0.1607
328	0.0424	-0.1537
329	0.0518	-0.1677
330	0.0518	-0.1677
331	0.0413	-0.1747
332	0.0413	-0.1747
333	0.0413	-0.1747
334	0.0215	-0.1676
335	0.0215	-0.1676
336	0.0413	-0.1747
337	0.0413	-0.1747
338	0.032	-0.1607
339	0.0518	-0.1677
340	0.0518	-0.1677
341	0.0424	-0.1537
342	0.0424	-0.1537
343	0.0424	-0.1537
344	0.0424	-0.1537
345	0.032	-0.1607
346	0.032	-0.1607
347	0.032	-0.1607
348	0.032	-0.1607
349	0.032	-0.1607
350	0.0121	-0.1537
351	0.0121	-0.1537
352	0.0121	-0.1537
353	-0.0077	-0.1466
354	0.0121	-0.1537
355	0.0121	-0.1537
356	0.0226	-0.1467
357	0.0424	-0.1537
358	0.0529	-0.1467
359	0.0634	-0.1398
360	0.0832	-0.1468
361	0.1031	-0.1538
362	0.1031	-0.1538
363	0.1031	-0.1538
364	0.0832	-0.1468
365	0.0926	-0.1608
366	0.0926	-0.1608
367	0.0821	-0.1677
368	0.0717	-0.1747
369	0.0518	-0.1677
370	0.0612	-0.1817
371	0.0413	-0.1747
372	0.0507	-0.1886
373	0.0309	-0.1816
374	0.0309	-0.1816
375	0.0507	-0.1886
376	0.0413	-0.1747
377	0.0413	-0.1747
378	0.0612	-0.1817
379	0.0518	-0.1677
380	0.0518	-0.1677
381	0.0518	-0.1677
382	0.0518	-0.1677
383	0.0413	-0.1747
384	0.0215	-0.1676
385	0.0215	-0.1676
386	0.0309	-0.1816
387	0.0309	-0.1816
388	0.0309	-0.1816
389	0.011	-0.1746
390	0.011	-0.1746
391	0.0016	-0.1606
392	0.0016	-0.1606
393	0.0016	-0.1606
394	0.0016	-0.1606
395	0.011	-0.1746
396	-0.0088	-0.1676
397	-0.0088	-0.1676
398	-0.0088	-0.1676
399	0.011	-0.1746
400	0.0016	-0.1606
401	0.0215	-0.1676
402	0.032	-0.1607
403	0.0518	-0.1677
404	0.0518	-0.1677
405	0.0518	-0.1677
406	0.0518	-0.1677
407	0.0518	-0.1677
408	0.0518	-0.1677
409	0.0612	-0.1817
410	0.0413	-0.1747
411	0.0413	-0.1747
412	0.0309	-0.1816
413	0.0204	-0.1886
414	0.0204	-0.1886
415	0.0099	-0.1956
416	0.0099	-0.1956
417	0.0193	-0.2095
418	0.0193	-0.2095
419	-0.0006	-0.2025
420	-0.0006	-0.2025
421	0.0088	-0.2165
422	-0.011	-0.2095
423	-0.0017	-0.2235
424	-0.0215	-0.2165
425	-0.032	-0.2235
426	-0.032	-0.2235
427	-0.0425	-0.2304
428	-0.0425	-0.2304
429	-0.0425	-0.2304
430	-0.0518	-0.2164
431	-0.032	-0.2235
432	-0.0414	-0.2095
433	-0.0414	-0.2095
434	-0.0414	-0.2095
435	-0.0414	-0.2095
436	-0.0414	-0.2095
437	-0.0414	-0.2095
438	-0.0612	-0.2025
439	-0.0518	-0.2164
440	-0.0518	-0.2164
441	-0.0518	-0.2164
442	-0.0518	-0.2164
443	-0.032	-0.2235
444	-0.032	-0.2235
445	-0.032	-0.2235
446	-0.0215	-0.2165
447	-0.0017	-0.2235
448	-0.011	-0.2095
449	0.0088	-0.2165
450	0.0088	-0.2165
451	0.0088	-0.2165
452	0.0088	-0.2165
453	0.0088	-0.2165
454	0.0088	-0.2165
455	-0.011	-0.2095
456	-0.0017	-0.2235
457	-0.0017	-0.2235
458	-0.0215	-0.2165
459	-0.032	-0.2235
460	-0.0226	-0.2374
461	-0.0425	-0.2304
462	-0.0331	-0.2444
463	-0.0529	-0.2374
464	-0.0529	-0.2374
465	-0.0529	-0.2374
466	-0.0529	-0.2374
467	-0.0529	-0.2374
468	-0.0623	-0.2234
469	-0.0623	-0.2234
470	-0.0425	-0.2304
471	-0.0425	-0.2304
472	-0.0518	-0.2164
473	-0.0518	-0.2164
474	-0.0414	-0.2095
475	-0.0414	-0.2095
476	-0.0414	-0.2095
477	-0.0414	-0.2095
478	-0.0414	-0.2095
479	-0.0612	-0.2025
480	-0.0518	-0.2164
481	-0.0717	-0.2094
482	-0.0717	-0.2094
483	-0.0623	-0.2234
484	-0.0822	-0.2164
485	-0.0717	-0.2094
486	-0.0717	-0.2094
487	-0.0518	-0.2164
488	-0.0414	-0.2095
489	-0.0309	-0.2025
490	-0.011	-0.2095
491	-0.011	-0.2095
492	-0.011	-0.2095
493	-0.011	-0.2095
494	-0.011	-0.2095
495	-0.011	-0.2095
496	-0.011	-0.2095
497	-0.011	-0.2095
498	-0.0006	-0.2025
499	-0.0006	-0.2025
500	0.0193	-0.2095
501	0.0193	-0.2095
502	0.0193	-0.2095
503	0.0193	-0.2095
504	-0.0006	-0.2025
505	-0.0006	-0.2025
506	-0.0006	-0.2025
507	-0.0006	-0.2025
508	-0.0006	-0.2025
509	0.0193	-0.2095
510	0.0193	-0.2095
511	0.0193	-0.2095
512	-0.0006	-0.2025
513	-0.0006	-0.2025
514	-0.0006	-0.2025
515	-0.0006	-0.2025
516	-0.0099	-0.1886
517	0.0099	-0.1956
518	0.0005	-0.1816
519	0.0005	-0.1816
520	0.0005	-0.1816
521	0.0005	-0.1816
522	0.0005	-0.1816
523	0.0005	-0.1816
524	0.0005	-0.1816
525	-0.0193	-0.1746
526	-0.0193	-0.1746
527	-0.0193	-0.1746
528	-0.0193	-0.1746
529	0.0005	-0.1816
530	0.011	-0.1746
531	0.0215	-0.1676
532	0.032	-0.1607
533	0.0518	-0.1677
534	0.0518	-0.1677
535	0.0518	-0.1677
536	0.0518	-0.1677
537	0.0518	-0.1677
538	0.0518	-0.1677
539	0.0518	-0.1677
540	0.0518	-0.1677
541	0.0413	-0.1747
542	0.0413	-0.1747
543	0.0215	-0.1676
544	0.0309	-0.1816
545	0.0309	-0.1816
546	0.0309	-0.1816
547	0.0309	-0.1816
548	0.0309	-0.1816
549	0.0309	-0.1816
550	0.0309	-0.1816
551	0.0309	-0.1816
552	0.0309	-0.1816
553	0.011	-0.1746
554	0.011	-0.1746
555	0.011	-0.1746
556	0.0204	-0.1886
557	0.0204	-0.1886
558	0.0204	-0.1886
559	0.0005	-0.1816
560	0.0005	-0.1816
561	0.0005	-0.1816
562	0.0005	-0.1816
563	0.0005	-0.1816
564	0.0005	-0.1816
565	0.0005	-0.1816
566	-0.0193	-0.1746
567	-0.0193	-0.1746
568	-0.0193	-0.1746
569	0.0005	-0.1816
570	0.011	-0.1746
571	0.0215	-0.1676
572	0.0413	-0.1747
573	0.032	-0.1607
574	0.0518	-0.1677
575	0.0518	-0.1677
576	0.0717	-0.1747
577	0.0717	-0.1747
578	0.0717	-0.1747
579	0.0518	-0.1677
580	0.0518	-0.1677
581	0.0518	-0.1677
582	0.0612	-0.1817
583	0.0612	-0.1817
584	0.0413	-0.1747
585	0.0507	-0.1886
586	0.0507	-0.1886
587	0.0309	-0.1816
588	0.0309	-0.1816
589	0.0309	-0.1816
590	0.0402	-0.1956
591	0.0402	-0.1956
592	0.0402	-0.1956
593	0.0402	-0.1956
594	0.0204	-0.1886
595	0.0204	-0.1886
596	0.0204	-0.1886
597	0.0005	-0.1816
598	0.0005	-0.1816
599	0.0099	-0.1956
600	0.0099	-0.1956
601	-0.0099	-0.1886
602	-0.0099	-0.1886
603	-0.0193	-0.1746
604	-0.0099	-0.1886
605	-0.0099	-0.1886
606	-0.0099	-0.1886
607	-0.0298	-0.1815
608	-0.0298	-0.1815
609	-0.0298	-0.1815
610	-0.0298	-0.1815
611	-0.0403	-0.1885
612	-0.0403	-0.1885
613	-0.0496	-0.1745
614	-0.0496	-0.1745
615	-0.0298	-0.1815
616	-0.0193	-0.1746
617	-0.0088	-0.1676
618	0.011	-0.1746
619	0.0215	-0.1676
620	0.0413	-0.1747
621	0.0413	-0.1747
622	0.0413	-0.1747
623	0.0413	-0.1747
624	0.0413	-0.1747
625	0.0309	-0.1816
626	0.0309	-0.1816
627	0.0402	-0.1956
628	0.0204	-0.1886
629	0.0204	-0.1886
630	0.0298	-0.2026
631	0.0099	-0.1956
632	0.0099	-0.1956
633	-0.0099	-0.1886
634	-0.0099	-0.1886
635	-0.0099	-0.1886
636	-0.0006	-0.2025
637	-0.0006	-0.2025
638	-0.0006	-0.2025
639	-0.0006	-0.2025
640	-0.0006	-0.2025
641	-0.0204	-0.1955
642	-0.0204	-0.1955
643	-0.0204	-0.1955
644	-0.0309	-0.2025
645	-0.0309	-0.2025
646	-0.0309	-0.2025
647	-0.0507	-0.1955
648	-0.0507	-0.1955
649	-0.0507	-0.1955
650	-0.0507	-0.1955
651	-0.0507	-0.1955
652	-0.0507	-0.1955
653	-0.0706	-0.1885
654	-0.0706	-0.1885
655	-0.0612	-0.2025
656	-0.0706	-0.1885
657	-0.0507	-0.1955
658	-0.0403	-0.1885
659	-0.0298	-0.1815
660	-0.0193	-0.1746
661	0.0005	-0.1816
662	0.011	-0.1746
663	0.011	-0.1746
664	0.0309	-0.1816
665	0.011	-0.1746
666	0.011	-0.1746
667	0.0204	-0.1886
668	0.0204	-0.1886
669	0.0005	-0.1816
670	0.0005	-0.1816
671	0.0005	-0.1816
672	0.0099	-0.1956
673	0.0099	-0.1956
674	0.0099	-0.1956
675	0.0099	-0.1956
676	0.0099	-0.1956
677	0.0099	-0.1956
678	0.0099	-0.1956
679	0.0005	-0.1816
680	0.0005	-0.1816
681	0.0005	-0.1816
682	0.0005	-0.1816
683	0.0005	-0.1816
684	0.0005	-0.1816
685	-0.0193	-0.1746
686	-0.0193	-0.1746
687	-0.0099	-0.1886
688	-0.0099	-0.1886
689	-0.0298	-0.1815
690	-0.0298	-0.1815
691	-0.0298	-0.1815
692	-0.0496	-0.1745
693	-0.0496	-0.1745
694	-0.0496	-0.1745
695	-0.0496	-0.1745
696	-0.0496	-0.1745
697	-0.0496	-0.1745
698	-0.0392	-0.1676
699	-0.0287	-0.1606
700	0.0016	-0.1606
701	0.0121	-0.1537
702	0.032	-0.1607
703	0.0424	-0.1537
704	0.0623	-0.1607
705	0.0623	-0.1607
706	0.0529	-0.1467
707	0.0623	-0.1607
708	0.0623	-0.1607
709	0.0623	-0.1607
710	0.0623	-0.1607
711	0.0623	-0.1607
712	0.0623	-0.1607
713	0.0623	-0.1607
714	0.0623	-0.1607
715	0.0424	-0.1537
716	0.0424	-0.1537
717	0.0518	-0.1677
718	0.0518	-0.1677
719	0.032	-0.1607
720	0.0413	-0.1747
721	0.0215	-0.1676
722	0.0215	-0.1676
723	0.011	-0.1746
724	0.0204	-0.1886
725	0.0005	-0.1816
726	0.0099	-0.1956
727	-0.0099	-0.1886
728	-0.0099	-0.1886
729	-0.0099	-0.1886
730	-0.0193	-0.1746
731	0.0005	-0.1816
732	0.0005	-0.1816
733	-0.0193	-0.1746
734	-0.0193	-0.1746
735	-0.0392	-0.1676
736	-0.0298	-0.1815
737	-0.0496	-0.1745
738	-0.0403	-0.1885
739	-0.0601	-0.1815
740	-0.0601	-0.1815
741	-0.0403	-0.1885
742	-0.0298	-0.1815
743	-0.0193	-0.1746
744	0.0005	-0.1816
745	0.011	-0.1746
746	0.011	-0.1746
747	0.011	-0.1746
748	0.0204	-0.1886
749	0.0204	-0.1886
750	0.0204	-0.1886
751	0.0099	-0.1956
752	0.0099	-0.1956
753	-0.0006	-0.2025
754	-0.0006	-0.2025
755	-0.011	-0.2095
756	-0.011	-0.2095
757	-0.011	-0.2095
758	-0.011	-0.2095
759	-0.011	-0.2095
760	-0.011	-0.2095
761	-0.011	-0.2095
762	-0.011	-0.2095
763	-0.011	-0.2095
764	-0.011	-0.2095
765	-0.011	-0.2095
766	-0.011	-0.2095
767	-0.011	-0.2095
768	-0.0309	-0.2025
769	-0.0414	-0.2095
770	-0.0414	-0.2095
771	-0.0612	-0.2025
772	-0.0717	-0.2094
773	-0.0717	-0.2094
774	-0.0822	-0.2164
775	-0.0822	-0.2164
776	-0.102	-0.2094
777	-0.1125	-0.2164
778	-0.1229	-0.2233
779	-0.1136	-0.2373
780	-0.1241	-0.2443
781	-0.1439	-0.2373
782	-0.1544	-0.2442
783	-0.1439	-0.2373
784	-0.1334	-0.2303
785	-0.1125	-0.2164
786	-0.0717	-0.2094
787	-0.0507	-0.1955
788	-0.0099	-0.1886
789	0.0204	-0.1886
790	0.0309	-0.1816
791	0.0413	-0.1747
792	0.0413	-0.1747
793	0.0215	-0.1676
794	0.011	-0.1746
795	0.0005	-0.1816
796	-0.0204	-0.1955
797	-0.0309	-0.2025
798	-0.0414	-0.2095
799	-0.0518	-0.2164
800	-0.0623	-0.2234
801	-0.0623	-0.2234
802	-0.0623	-0.2234
803	-0.0518	-0.2164
804	-0.0612	-0.2025
805	-0.0414	-0.2095
806	-0.0309	-0.2025
807	-0.0204	-0.1955
808	-0.0099	-0.1886
809	-0.0099	-0.1886
810	0.0005	-0.1816
811	-0.0088	-0.1676
812	0.0016	-0.1606
813	0.0215	-0.1676
814	0.0121	-0.1537
815	0.0226	-0.1467
816	0.0226	-0.1467
817	0.0027	-0.1397
818	0.0121	-0.1537
819	-0.0077	-0.1466
820	-0.0182	-0.1536
821	-0.038	-0.1466
822	-0.0287	-0.1606
823	-0.0287	-0.1606
824	-0.0287	-0.1606
825	-0.0088	-0.1676
826	-0.0088	-0.1676
827	-0.0088	-0.1676
828	-0.0088	-0.1676
829	0.011	-0.1746
830	0.0016	-0.1606
831	0.0215	-0.1676
832	0.0121	-0.1537
833	0.0121	-0.1537
834	0.0121	-0.1537
835	0.0121	-0.1537
836	0.0121	-0.1537
837	0.0016	-0.1606
838	-0.0182	-0.1536
839	-0.0088	-0.1676
840	-0.0088	-0.1676
841	-0.0088	-0.1676
842	-0.0182	-0.1536
843	0.0016	-0.1606
844	0.0016	-0.1606
845	-0.0077	-0.1466
846	0.0121	-0.1537
847	0.0027	-0.1397
848	0.0027	-0.1397
849	0.0132	-0.1327
850	0.0132	-0.1327
851	0.0039	-0.1187
852	0.0237	-0.1257
853	0.0143	-0.1118
854	0.0143	-0.1118
855	-0.0055	-0.1047
856	0.0039	-0.1187
857	-0.0066	-0.1257
858	-0.0265	-0.1187
859	-0.0369	-0.1257
860	-0.0276	-0.1396
861	-0.0474	-0.1326
862	-0.038	-0.1466
863	-0.038	-0.1466
864	-0.038	-0.1466
865	-0.0287	-0.1606
866	-0.0287	-0.1606
867	-0.0193	-0.1746
868	-0.0392	-0.1676
869	-0.0298	-0.1815
870	-0.0403	-0.1885
871	-0.0507	-0.1955
872	-0.0612	-0.2025
873	-0.0822	-0.2164
874	-0.0926	-0.2234
875	-0.1136	-0.2373
876	-0.1241	-0.2443
877	-0.1241	-0.2443
878	-0.1241	-0.2443
879	-0.1241	-0.2443
880	-0.1136	-0.2373
881	-0.1031	-0.2303
882	-0.0822	-0.2164
883	-0.0717	-0.2094
884	-0.0706	-0.1885
885	-0.0601	-0.1815
886	-0.0403	-0.1885
887	-0.0496	-0.1745
888	-0.0392	-0.1676
889	-0.0392	-0.1676
890	-0.0485	-0.1536
891	-0.0287	-0.1606
892	-0.0287	-0.1606
893	-0.0287	-0.1606
894	-0.0287	-0.1606
895	-0.0485	-0.1536
896	-0.0485	-0.1536
897	-0.059	-0.1605
898	-0.0788	-0.1535
899	-0.0788	-0.1535
900	-0.0788	-0.1535
901	-0.059	-0.1605
902	-0.0485	-0.1536
903	-0.0182	-0.1536
904	0.0027	-0.1397
905	0.0132	-0.1327
906	0.0342	-0.1188
907	0.0446	-0.1118
908	0.0645	-0.1188
909	0.0551	-0.1048
910	0.0551	-0.1048
911	0.075	-0.1118
912	0.075	-0.1118
913	0.075	-0.1118
914	0.075	-0.1118
915	0.0551	-0.1048
916	0.0551	-0.1048
917	0.0551	-0.1048
918	0.0551	-0.1048
919	0.0551	-0.1048
920	0.0551	-0.1048
921	0.0551	-0.1048
922	0.0551	-0.1048
923	0.0551	-0.1048
924	0.0551	-0.1048
925	0.0645	-0.1188
926	0.0645	-0.1188
927	0.0446	-0.1118
928	0.0446	-0.1118
929	0.0446	-0.1118
930	0.0446	-0.1118
931	0.0446	-0.1118
932	0.0248	-0.1048
933	0.0248	-0.1048
934	0.0248	-0.1048
935	0.0248	-0.1048
936	0.0248	-0.1048
937	0.0248	-0.1048
938	0.0248	-0.1048
939	0.0154	-0.0908
940	0.0353	-0.0978
941	0.0457	-0.0908
942	0.0562	-0.0839
943	0.0667	-0.0769
944	0.097	-0.0769
945	0.097	-0.0769
946	0.1075	-0.07
947	0.1075	-0.07
948	0.1273	-0.077
949	0.1273	-0.077
950	0.1273	-0.077
951	0.1273	-0.077
952	0.1169	-0.0839
953	0.1169	-0.0839
954	0.097	-0.0769
955	0.1064	-0.0909
956	0.0865	-0.0839
957	0.0959	-0.0979
958	0.0761	-0.0909
959	0.0761	-0.0909
960	0.0854	-0.1049
961	0.0562	-0.0839
962	0.0562	-0.0839
963	0.0562	-0.0839
964	0.0562	-0.0839
965	0.0562	-0.0839
966	0.0562	-0.0839
967	0.0761	-0.0909
968	0.0761	-0.0909
969	0.0667	-0.0769
970	0.0667	-0.0769
971	0.0667	-0.0769
972	0.0469	-0.0699
973	0.0469	-0.0699
974	0.0562	-0.0839
975	0.0562	-0.0839
976	0.0364	-0.0769
977	0.0364	-0.0769
978	0.0364	-0.0769
979	0.0364	-0.0769
980	0.0165	-0.0698
981	0.0165	-0.0698
982	0.0165	-0.0698
983	0.0364	-0.0769
984	0.0364	-0.0769
985	0.0562	-0.0839
986	0.0667	-0.0769
987	0.0667	-0.0769
988	0.0865	-0.0839
989	0.0865	-0.0839
990	0.0865	-0.0839
991	0.097	-0.0769
992	0.097	-0.0769
993	0.097	-0.0769
994	0.1075	-0.07
995	0.1075	-0.07
996	0.118	-0.063
997	0.1284	-0.056
998	0.1284	-0.056
999	0.1389	-0.0491
1000	0.1389	-0.0491
1001	0.1389	-0.0491
1002	0.1494	-0.0421
1003	0.1494	-0.0421
1004	0.1494	-0.0421
1005	0.1494	-0.0421
1006	0.1494	-0.0421
1007	0.1389	-0.0491
1008	0.1389	-0.0491
1009	0.1191	-0.042
1010	0.1086	-0.049
1011	0.118	-0.063
1012	0.0981	-0.056
1013	0.0876	-0.063
1014	0.0876	-0.063
1015	0.0678	-0.0559
1016	0.0772	-0.0699
1017	0.0573	-0.0629
1018	0.0573	-0.0629
1019	0.0573	-0.0629
1020	0.0573	-0.0629
1021	0.0573	-0.0629
1022	0.048	-0.0489
1023	0.048	-0.0489
1024	0.048	-0.0489
1025	0.048	-0.0489
1026	0.048	-0.0489
1027	0.0584	-0.042
1028	0.0689	-0.035
1029	0.0794	-0.028
1030	0.1191	-0.042
1031	0.1295	-0.0351
1032	0.1295	-0.0351
1033	0.14	-0.0281
1034	0.14	-0.0281
1035	0.14	-0.0281
1036	0.14	-0.0281
1037	0.1494	-0.0421
1038	0.1494	-0.0421
1039	0.1494	-0.0421
1040	0.1494	-0.0421
1041	0.1494	-0.0421
1042	0.1389	-0.0491
1043	0.1389	-0.0491
1044	0.1191	-0.042
1045	0.1191	-0.042
1046	0.1191	-0.042
1047	0.1284	-0.056
1048	0.1284	-0.056
1049	0.1191	-0.042
1050	0.1191	-0.042
1051	0.1191	-0.042
1052	0.1086	-0.049
1053	0.1086	-0.049
1054	0.1086	-0.049
1055	0.0887	-0.042
1056	0.0887	-0.042
1057	0.0887	-0.042
1058	0.0887	-0.042
1059	0.0783	-0.049
1060	0.0783	-0.049
1061	0.0783	-0.049
1062	0.0689	-0.035
1063	0.0689	-0.035
1064	0.0783	-0.049
1065	0.0584	-0.042
1066	0.0584	-0.042
1067	0.0584	-0.042
1068	0.0584	-0.042
1069	0.0386	-0.0349
1070	0.0386	-0.0349
1071	0.0386	-0.0349
1072	0.0386	-0.0349
1073	0.0491	-0.028
1074	0.0595	-0.021
1075	0.0899	-0.021
1076	0.1003	-0.0141
1077	0.1202	-0.0211
1078	0.1306	-0.0141
1079	0.1306	-0.0141
1080	0.1505	-0.0211
1081	0.1505	-0.0211
1082	0.1505	-0.0211
1083	0.1505	-0.0211
1084	0.1505	-0.0211
1085	0.1306	-0.0141
1086	0.1306	-0.0141
1087	0.14	-0.0281
1088	0.1202	-0.0211
1089	0.1202	-0.0211
1090	0.1202	-0.0211
1091	0.1202	-0.0211
1092	0.1202	-0.0211
1093	0.1202	-0.0211
1094	0.1202	-0.0211
1095	0.1202	-0.0211
1096	0.1202	-0.0211
1097	0.1202	-0.0211
1098	0.1202	-0.0211
1099	0.1097	-0.0281
1100	0.1097	-0.0281
1101	0.1097	-0.0281
1102	0.0899	-0.021
1103	0.0899	-0.021
1104	0.0899	-0.021
1105	0.0899	-0.021
1106	0.0899	-0.021
1107	0.0899	-0.021
1108	0.07	-0.014
1109	0.07	-0.014
1110	0.07	-0.014
1111	0.0502	-0.007
1112	0.0595	-0.021
1113	0.0595	-0.021
1114	0.0397	-0.014
1115	0.0595	-0.021
1116	0.07	-0.014
1117	0.0805	-0.0071
1118	0.1108	-0.0071
1119	0.1213	-0.0001
1120	0.1318	0.0068
1121	0.1516	-0.0002
1122	0.1621	0.0068
1123	0.1621	0.0068
1124	0.1621	0.0068
1125	0.1621	0.0068
1126	0.1621	0.0068
1127	0.1714	-0.0072
1128	0.1516	-0.0002
1129	0.1516	-0.0002
1130	0.1516	-0.0002
1131	0.1516	-0.0002
1132	0.1516	-0.0002
1133	0.1516	-0.0002
1134	0.1516	-0.0002
1135	0.1318	0.0068
1136	0.1318	0.0068
1137	0.1411	-0.0071
1138	0.1411	-0.0071
1139	0.1411	-0.0071
1140	0.1213	-0.0001
1141	0.1213	-0.0001
1142	0.1213	-0.0001
1143	0.1108	-0.0071
1144	0.1108	-0.0071
1145	0.1108	-0.0071
1146	0.1108	-0.0071
1147	0.1108	-0.0071
1148	0.1108	-0.0071
1149	0.1014	0.0069
1150	0.0816	0.0139
1151	0.091	-0.0001
1152	0.091	-0.0001
1153	0.091	-0.0001
1154	0.0711	0.0069
1155	0.0711	0.0069
1156	0.0513	0.0139
1157	0.0606	-0.0001
1158	0.0606	-0.0001
1159	0.0513	0.0139
1160	0.0711	0.0069
1161	0.1014	0.0069
1162	0.1119	0.0138
1163	0.1224	0.0208
1164	0.1329	0.0278
1165	0.1527	0.0208
1166	0.1527	0.0208
1167	0.1527	0.0208
1168	0.1527	0.0208
1169	0.1725	0.0138
1170	0.1725	0.0138
1171	0.1725	0.0138
1172	0.1527	0.0208
1173	0.1527	0.0208
1174	0.1527	0.0208
1175	0.1527	0.0208
1176	0.1527	0.0208
1177	0.1527	0.0208
1178	0.1621	0.0068
1179	0.1422	0.0138
1180	0.1422	0.0138
1181	0.1422	0.0138
1182	0.1422	0.0138
1183	0.1422	0.0138
1184	0.1422	0.0138
1185	0.1422	0.0138
1186	0.1224	0.0208
1187	0.1224	0.0208
1188	0.1224	0.0208
1189	0.1119	0.0138
1190	0.1119	0.0138
1191	0.1119	0.0138
1192	0.1119	0.0138
1193	0.0921	0.0209
1194	0.0921	0.0209
1195	0.0921	0.0209
1196	0.0921	0.0209
1197	0.0921	0.0209
1198	0.0921	0.0209
1199	0.0722	0.0279
1200	0.0722	0.0279
1201	0.0722	0.0279
1202	0.0524	0.0349
1203	0.0524	0.0349
1204	0.0524	0.0349
1205	0.0722	0.0279
1206	0.0827	0.0348
1207	0.113	0.0348
1208	0.1235	0.0418
1209	0.1433	0.0348
1210	0.1538	0.0417
1211	0.1736	0.0347
1212	0.1643	0.0487
1213	0.1841	0.0417
1214	0.1841	0.0417
1215	0.1841	0.0417
1216	0.1841	0.0417
1217	0.1841	0.0417
1218	0.1748	0.0557
1219	0.1946	0.0487
1220	0.1852	0.0626
1221	0.2051	0.0556
1222	0.2051	0.0556
1223	0.1957	0.0696
1224	0.1957	0.0696
1225	0.1957	0.0696
1226	0.2051	0.0556
1227	0.1852	0.0626
1228	0.1852	0.0626
1229	0.1852	0.0626
1230	0.1852	0.0626
1231	0.1852	0.0626
1232	0.1748	0.0557
1233	0.1748	0.0557
1234	0.1549	0.0627
1235	0.1549	0.0627
1236	0.1643	0.0487
1237	0.1444	0.0557
1238	0.1444	0.0557
1239	0.1444	0.0557
1240	0.1444	0.0557
1241	0.1246	0.0627
1242	0.1246	0.0627
1243	0.1141	0.0558
1244	0.1141	0.0558
1245	0.1036	0.0488
1246	0.0838	0.0558
1247	0.0733	0.0488
1248	0.0535	0.0558
1249	0.0628	0.0419
1250	0.0628	0.0419
1251	0.0628	0.0419
1252	0.0838	0.0558
1253	0.1141	0.0558
1254	0.1351	0.0697
1255	0.1654	0.0697
1256	0.1863	0.0836
1257	0.2073	0.0975
1258	0.2178	0.1045
1259	0.2376	0.0975
1260	0.2481	0.1045
1261	0.2585	0.1114
1262	0.2585	0.1114
1263	0.269	0.1184
1264	0.269	0.1184
1265	0.2784	0.1044
1266	0.2585	0.1114
1267	0.2387	0.1185
1268	0.2481	0.1045
1269	0.2376	0.0975
1270	0.2376	0.0975
1271	0.2178	0.1045
1272	0.2271	0.0905
1273	0.2178	0.1045
1274	0.2178	0.1045
1275	0.2178	0.1045
1276	0.2178	0.1045
1277	0.2178	0.1045
1278	0.2178	0.1045
1279	0.2178	0.1045
1280	0.2178	0.1045
1281	0.1979	0.1115
1282	0.1979	0.1115
1283	0.1979	0.1115
1284	0.1979	0.1115
1285	0.1979	0.1115
1286	0.1979	0.1115
1287	0.1979	0.1115
1288	0.1979	0.1115
1289	0.1979	0.1115
1290	0.1979	0.1115
1291	0.1781	0.1185
1292	0.1781	0.1185
1293	0.1885	0.1255
1294	0.199	0.1325
1295	0.2189	0.1255
1296	0.2293	0.1324
1297	0.2398	0.1394
1298	0.2597	0.1324
1299	0.2701	0.1394
1300	0.2701	0.1394
1301	0.2701	0.1394
1302	0.2701	0.1394
1303	0.2701	0.1394
1304	0.2795	0.1254
1305	0.2597	0.1324
1306	0.2597	0.1324
1307	0.2597	0.1324
1308	0.269	0.1184
1309	0.2492	0.1254
1310	0.2492	0.1254
1311	0.2492	0.1254
1312	0.2492	0.1254
1313	0.2492	0.1254
1314	0.2492	0.1254
1315	0.2398	0.1394
1316	0.2398	0.1394
1317	0.2492	0.1254
1318	0.2492	0.1254
1319	0.2492	0.1254
1320	0.2492	0.1254
1321	0.2398	0.1394
1322	0.2304	0.1534
1323	0.2503	0.1464
1324	0.2608	0.1534
1325	0.2619	0.1743
1326	0.2723	0.1813
1327	0.3027	0.1812
1328	0.3131	0.1882
1329	0.3142	0.2092
1330	0.3341	0.2021
1331	0.3247	0.2161
1332	0.3352	0.2231
1333	0.3655	0.2231
1334	0.376	0.23
1335	0.3864	0.237
1336	0.4063	0.23
1337	0.4063	0.23
1338	0.4063	0.23
1339	0.4063	0.23
1340	0.4063	0.23
1341	0.4157	0.216
1342	0.4157	0.216
1343	0.4052	0.209
1344	0.4052	0.209
1345	0.3947	0.2021
1346	0.3842	0.1951
1347	0.3842	0.1951
1348	0.3738	0.1881
1349	0.3539	0.1951
1350	0.3539	0.1951
1351	0.3633	0.1812
1352	0.3633	0.1812
1353	0.3539	0.1951
1354	0.3539	0.1951
1355	0.3539	0.1951
1356	0.3434	0.1882
1357	0.3434	0.1882
1358	0.333	0.1812
1359	0.333	0.1812
1360	0.3225	0.1742
1361	0.312	0.1673
1362	0.3015	0.1603
1363	0.2911	0.1533
1364	0.2712	0.1603
1365	0.2608	0.1534
1366	0.2608	0.1534
1367	0.2409	0.1604
1368	0.2409	0.1604
1369	0.2409	0.1604
1370	0.2409	0.1604
1371	0.2211	0.1674
1372	0.2211	0.1674
1373	0.2211	0.1674
1374	0.2409	0.1604
1375	0.2608	0.1534
1376	0.2514	0.1673
1377	0.2712	0.1603
1378	0.2712	0.1603
1379	0.2712	0.1603
1380	0.2806	0.1463
1381	0.2806	0.1463
1382	0.29	0.1324
1383	0.2701	0.1394
1384	0.2701	0.1394
1385	0.2701	0.1394
1386	0.2701	0.1394
1387	0.2806	0.1463
1388	0.3004	0.1393
1389	0.3109	0.1463
1390	0.312	0.1673
1391	0.3225	0.1742
1392	0.3528	0.1742
1393	0.3633	0.1812
1394	0.3738	0.1881
1395	0.3644	0.2021
1396	0.3644	0.2021
1397	0.3644	0.2021
1398	0.3738	0.1881
1399	0.3539	0.1951
1400	0.3434	0.1882
1401	0.3236	0.1952
1402	0.333	0.1812
1403	0.3131	0.1882
1404	0.3131	0.1882
1405	0.3027	0.1812
1406	0.2828	0.1882
1407	0.2922	0.1743
1408	0.2723	0.1813
1409	0.2723	0.1813
1410	0.2619	0.1743
1411	0.2514	0.1673
1412	0.2315	0.1743
1413	0.2409	0.1604
1414	0.2211	0.1674
1415	0.2211	0.1674
1416	0.2315	0.1743
1417	0.242	0.1813
1418	0.2723	0.1813
1419	0.2828	0.1882
1420	0.3131	0.1882
1421	0.3236	0.1952
1422	0.3434	0.1882
1423	0.3341	0.2021
1424	0.3539	0.1951
1425	0.3539	0.1951
1426	0.3539	0.1951
1427	0.3539	0.1951
1428	0.3341	0.2021
1429	0.3434	0.1882
1430	0.3236	0.1952
1431	0.3236	0.1952
1432	0.3131	0.1882
1433	0.3131	0.1882
1434	0.3131	0.1882
1435	0.3131	0.1882
1436	0.3131	0.1882
1437	0.3131	0.1882
1438	0.3131	0.1882
1439	0.3131	0.1882
1440	0.3131	0.1882
1441	0.3038	0.2022
1442	0.3038	0.2022
1443	0.3038	0.2022
1444	0.3038	0.2022
1445	0.2944	0.2162
1446	0.2944	0.2162
1447	0.3038	0.2022
1448	0.2839	0.2092
1449	0.2839	0.2092
1450	0.2641	0.2162
1451	0.2641	0.2162
1452	0.2641	0.2162
1453	0.2641	0.2162
1454	0.2641	0.2162
1455	0.2745	0.2232
1456	0.285	0.2302
1457	0.3153	0.2301
1458	0.3258	0.2371
1459	0.3457	0.2301
1460	0.3561	0.237
1461	0.376	0.23
1462	0.376	0.23
1463	0.376	0.23
1464	0.376	0.23
1465	0.376	0.23
1466	0.376	0.23
1467	0.376	0.23
1468	0.376	0.23
1469	0.3561	0.237
1470	0.376	0.23
1471	0.376	0.23
1472	0.376	0.23
1473	0.376	0.23
1474	0.376	0.23
1475	0.376	0.23
1476	0.3666	0.244
1477	0.3666	0.244
1478	0.3666	0.244
1479	0.3666	0.244
1480	0.3666	0.244
1481	0.3666	0.244
1482	0.3666	0.244
1483	0.3468	0.251
1484	0.3561	0.237
1485	0.3561	0.237
1486	0.3363	0.2441
1487	0.3363	0.2441
1488	0.3363	0.2441
1489	0.3363	0.2441
1490	0.3363	0.2441
1491	0.3363	0.2441
1492	0.3269	0.258
1493	0.3269	0.258
1494	0.3269	0.258
1495	0.3269	0.258
1496	0.3269	0.258
1497	0.3071	0.265
1498	0.2872	0.2721
1499	0.2966	0.2581
1500	0.3071	0.265
1501	0.3269	0.258
1502	0.3374	0.265
1503	0.3677	0.265
1504	0.3782	0.2719
1505	0.3887	0.2789
1506	0.4085	0.2719
1507	0.419	0.2789
1508	0.419	0.2789
1509	0.419	0.2789
1510	0.419	0.2789
1511	0.419	0.2789
1512	0.419	0.2789
1513	0.419	0.2789
1514	0.4295	0.2858
1515	0.4295	0.2858
1516	0.4399	0.2928
1517	0.4504	0.2998
1518	0.4609	0.3068
1519	0.4713	0.3137
1520	0.462	0.3277
1521	0.4818	0.3207
1522	0.4923	0.3277
1523	0.4923	0.3277
1524	0.4829	0.3416
1525	0.5028	0.3346
1526	0.4934	0.3486
1527	0.4934	0.3486
1528	0.4934	0.3486
1529	0.4934	0.3486
1530	0.4829	0.3416
1531	0.4631	0.3487
1532	0.4526	0.3417
1533	0.462	0.3277
1534	0.4515	0.3207
1535	0.4317	0.3277
1536	0.4317	0.3277
1537	0.4212	0.3208
1538	0.4212	0.3208
1539	0.4107	0.3138
1540	0.4002	0.3068
1541	0.3699	0.3069
1542	0.3385	0.286
1543	0.2977	0.279
1544	0.2861	0.2511
1545	0.2652	0.2372
1546	0.2442	0.2232
1547	0.2431	0.2023
1548	0.242	0.1813
1549	0.2514	0.1673
1550	0.2315	0.1743
1551	0.2514	0.1673
1552	0.2514	0.1673
1553	0.2514	0.1673
1554	0.2712	0.1603
1555	0.2619	0.1743
1556	0.2619	0.1743
1557	0.2619	0.1743
1558	0.2619	0.1743
1559	0.2619	0.1743
1560	0.2619	0.1743
1561	0.2619	0.1743
1562	0.2619	0.1743
1563	0.242	0.1813
1564	0.2514	0.1673
1565	0.2315	0.1743
1566	0.2211	0.1674
1567	0.1907	0.1674
1568	0.1896	0.1465
1569	0.1687	0.1325
1570	0.1185	0.1396
1571	0.1174	0.1186
1572	0.0871	0.1187
1573	0.0965	0.1047
1574	0.0871	0.1187
1575	0.0976	0.1256
1576	0.1384	0.1326
1577	0.15	0.1605
1578	0.1919	0.1884
1579	0.2233	0.2093
1580	0.2442	0.2232
1581	0.2547	0.2302
1582	0.2547	0.2302
1583	0.2547	0.2302
1584	0.2337	0.2163
1585	0.2233	0.2093
1586	0.2128	0.2023
1587	0.2128	0.2023
1588	0.2326	0.1953
1589	0.263	0.1953
1590	0.2839	0.2092
1591	0.3153	0.2301
1592	0.3572	0.258
1593	0.3887	0.2789
1594	0.4201	0.2998
1595	0.4504	0.2998
1596	0.441	0.3138
1597	0.441	0.3138
1598	0.4306	0.3068
1599	0.4107	0.3138
1600	0.4107	0.3138
1601	0.4306	0.3068
1602	0.441	0.3138
1603	0.4515	0.3207
1604	0.4421	0.3347
1605	0.4526	0.3417
1606	0.4526	0.3417
1607	0.4526	0.3417
1608	0.4421	0.3347
1609	0.4421	0.3347
1610	0.4421	0.3347
1611	0.4223	0.3417
1612	0.4223	0.3417
1613	0.4223	0.3417
1614	0.4223	0.3417
1615	0.4223	0.3417
1616	0.4223	0.3417
1617	0.4024	0.3487
1618	0.4024	0.3487
1619	0.4024	0.3487
1620	0.4024	0.3487
1621	0.4024	0.3487
1622	0.4024	0.3487
1623	0.3826	0.3558
1624	0.3826	0.3558
1625	0.3826	0.3558
1626	0.3826	0.3558
1627	0.3826	0.3558
1628	0.3931	0.3627
1629	0.4234	0.3627
1630	0.4339	0.3697
1631	0.4736	0.3556
1632	0.484	0.3626
1633	0.5039	0.3556
1634	0.4945	0.3696
1635	0.4945	0.3696
1636	0.4945	0.3696
1637	0.4945	0.3696
1638	0.4945	0.3696
1639	0.4945	0.3696
1640	0.484	0.3626
1641	0.484	0.3626
1642	0.484	0.3626
1643	0.484	0.3626
1644	0.484	0.3626
1645	0.4934	0.3486
1646	0.4934	0.3486
1647	0.4736	0.3556
1648	0.4642	0.3696
1649	0.4642	0.3696
1650	0.4736	0.3556
1651	0.4736	0.3556
1652	0.4736	0.3556
1653	0.4736	0.3556
1654	0.4736	0.3556
1655	0.4736	0.3556
1656	0.4537	0.3626
1657	0.4537	0.3626
1658	0.4537	0.3626
1659	0.4339	0.3697
1660	0.4339	0.3697
1661	0.4339	0.3697
1662	0.4339	0.3697
1663	0.4339	0.3697
1664	0.4234	0.3627
1665	0.4234	0.3627
1666	0.4035	0.3697
1667	0.3931	0.3627
1668	0.3931	0.3627
1669	0.3732	0.3697
1670	0.3931	0.3627
1671	0.4035	0.3697
1672	0.4234	0.3627
1673	0.4537	0.3626
1674	0.4642	0.3696
1675	0.4747	0.3766
1676	0.4945	0.3696
1677	0.5144	0.3626
1678	0.505	0.3765
1679	0.505	0.3765
1680	0.505	0.3765
1681	0.505	0.3765
1682	0.505	0.3765
1683	0.4851	0.3836
1684	0.4945	0.3696
1685	0.4945	0.3696
1686	0.4945	0.3696
1687	0.4747	0.3766
1688	0.4747	0.3766
1689	0.4747	0.3766
1690	0.4747	0.3766
1691	0.4747	0.3766
1692	0.4747	0.3766
1693	0.4747	0.3766
1694	0.4747	0.3766
1695	0.4747	0.3766
1696	0.4548	0.3836
1697	0.4548	0.3836
1698	0.4642	0.3696
1699	0.4642	0.3696
1700	0.4642	0.3696
1701	0.4642	0.3696
1702	0.4642	0.3696
1703	0.435	0.3906
1704	0.435	0.3906
1705	0.435	0.3906
1706	0.435	0.3906
1707	0.4151	0.3976
1708	0.4151	0.3976
1709	0.4245	0.3836
1710	0.4151	0.3976
1711	0.435	0.3906
1712	0.4454	0.3976
1713	0.4559	0.4046
1714	0.4862	0.4045
1715	0.4967	0.4115
1716	0.5364	0.3975
1717	0.5469	0.4044
1718	0.5375	0.4184
1719	0.5574	0.4114
1720	0.5574	0.4114
1721	0.5678	0.4184
1722	0.5574	0.4114
1723	0.5574	0.4114
1724	0.5574	0.4114
1725	0.5375	0.4184
1726	0.5469	0.4044
1727	0.5469	0.4044
1728	0.5375	0.4184
1729	0.5574	0.4114
1730	0.548	0.4254
1731	0.5678	0.4184
1732	0.5585	0.4324
1733	0.5783	0.4253
1734	0.5689	0.4393
1735	0.5689	0.4393
1736	0.5689	0.4393
1737	0.5585	0.4324
1738	0.548	0.4254
1739	0.5281	0.4324
1740	0.5177	0.4254
1741	0.5072	0.4185
1742	0.4967	0.4115
1743	0.4862	0.4045
1744	0.4664	0.4115
1745	0.4559	0.4046
1746	0.4454	0.3976
1747	0.435	0.3906
1748	0.4245	0.3836
1749	0.3942	0.3837
1750	0.3837	0.3767
1751	0.3732	0.3697
1752	0.3628	0.3628
1753	0.3628	0.3628
1754	0.3628	0.3628
1755	0.3931	0.3627
1756	0.4234	0.3627
1757	0.4339	0.3697
1758	0.4642	0.3696
1759	0.4747	0.3766
1760	0.4851	0.3836
1761	0.4956	0.3905
1762	0.5061	0.3975
1763	0.5166	0.4045
1764	0.5364	0.3975
1765	0.527	0.4114
1766	0.527	0.4114
1767	0.527	0.4114
1768	0.527	0.4114
1769	0.5364	0.3975
1770	0.5166	0.4045
1771	0.5259	0.3905
1772	0.5061	0.3975
1773	0.5155	0.3835
1774	0.4956	0.3905
1775	0.4956	0.3905
1776	0.4956	0.3905
1777	0.4758	0.3975
1778	0.4758	0.3975
1779	0.4851	0.3836
1780	0.4851	0.3836
1781	0.4653	0.3906
1782	0.4653	0.3906
1783	0.4653	0.3906
1784	0.4653	0.3906
1785	0.4454	0.3976
1786	0.4454	0.3976
1787	0.4454	0.3976
1788	0.4454	0.3976
1789	0.4454	0.3976
1790	0.4454	0.3976
1791	0.4361	0.4116
1792	0.4361	0.4116
1793	0.4361	0.4116
1794	0.4361	0.4116
1795	0.4162	0.4186
1796	0.4361	0.4116
1797	0.4466	0.4185
1798	0.457	0.4255
1799	0.4967	0.4115
1800	0.5072	0.4185
1801	0.5177	0.4254
1802	0.5375	0.4184
1803	0.5375	0.4184
1804	0.5375	0.4184
1805	0.5375	0.4184
1806	0.5375	0.4184
1807	0.5177	0.4254
1808	0.527	0.4114
1809	0.527	0.4114
1810	0.5166	0.4045
1811	0.5166	0.4045
1812	0.5166	0.4045
1813	0.4967	0.4115
1814	0.5061	0.3975
1815	0.5061	0.3975
1816	0.5061	0.3975
1817	0.5061	0.3975
1818	0.5061	0.3975
1819	0.5061	0.3975
1820	0.5061	0.3975
1821	0.4862	0.4045
1822	0.4862	0.4045
1823	0.4862	0.4045
1824	0.4862	0.4045
1825	0.4862	0.4045
1826	0.4664	0.4115
1827	0.4664	0.4115
1828	0.4664	0.4115
1829	0.4664	0.4115
1830	0.4664	0.4115
1831	0.4664	0.4115
1832	0.4466	0.4185
1833	0.4559	0.4046
1834	0.4559	0.4046
1835	0.4559	0.4046
1836	0.4361	0.4116
1837	0.4466	0.4185
1838	0.4664	0.4115
1839	0.4769	0.4185
1840	0.4873	0.4255
1841	0.5177	0.4254
1842	0.5281	0.4324
1843	0.548	0.4254
1844	0.5585	0.4324
1845	0.5585	0.4324
1846	0.5585	0.4324
1847	0.5585	0.4324
1848	0.5678	0.4184
1849	0.5678	0.4184
1850	0.548	0.4254
1851	0.548	0.4254
1852	0.5574	0.4114
1853	0.5375	0.4184
1854	0.5375	0.4184
1855	0.5375	0.4184
1856	0.5375	0.4184
1857	0.5375	0.4184
1858	0.5375	0.4184
1859	0.5375	0.4184
1860	0.5375	0.4184
1861	0.5375	0.4184
1862	0.5375	0.4184
1863	0.5375	0.4184
1864	0.527	0.4114
1865	0.527	0.4114
1866	0.5166	0.4045
1867	0.5166	0.4045
1868	0.4967	0.4115
1869	0.4967	0.4115
1870	0.4967	0.4115
1871	0.4862	0.4045
1872	0.4862	0.4045
1873	0.4862	0.4045
1874	0.4664	0.4115
1875	0.4664	0.4115
1876	0.4664	0.4115
1877	0.4466	0.4185
1878	0.4559	0.4046
1879	0.4361	0.4116
1880	0.4361	0.4116
1881	0.4361	0.4116
1882	0.4361	0.4116
1883	0.4466	0.4185
1884	0.457	0.4255
1885	0.4873	0.4255
1886	0.4978	0.4324
1887	0.5375	0.4184
1888	0.548	0.4254
1889	0.548	0.4254
1890	0.5585	0.4324
1891	0.5678	0.4184
1892	0.5678	0.4184
1893	0.5678	0.4184
1894	0.548	0.4254
1895	0.548	0.4254
1896	0.548	0.4254
1897	0.5574	0.4114
1898	0.5375	0.4184
1899	0.5375	0.4184
1900	0.5375	0.4184
1901	0.5375	0.4184
1902	0.5375	0.4184
1903	0.5375	0.4184
1904	0.5375	0.4184
1905	0.5375	0.4184
1906	0.5375	0.4184
1907	0.5375	0.4184
1908	0.5469	0.4044
1909	0.527	0.4114
1910	0.527	0.4114
1911	0.527	0.4114
1912	0.527	0.4114
1913	0.5072	0.4185
1914	0.4978	0.4324
1915	0.4978	0.4324
1916	0.4978	0.4324
1917	0.4978	0.4324
1918	0.4978	0.4324
1919	0.478	0.4394
1920	0.4873	0.4255
1921	0.4873	0.4255
1922	0.4873	0.4255
1923	0.4675	0.4325
1924	0.4675	0.4325
1925	0.4675	0.4325
1926	0.478	0.4394
1927	0.4884	0.4464
1928	0.4989	0.4534
1929	0.5292	0.4533
1930	0.5596	0.4533
1931	0.5794	0.4463
1932	0.5899	0.4533
1933	0.5899	0.4533
1934	0.5899	0.4533
1935	0.5899	0.4533
1936	0.5899	0.4533
1937	0.5794	0.4463
1938	0.5794	0.4463
1939	0.5794	0.4463
1940	0.5689	0.4393
1941	0.5689	0.4393
1942	0.5491	0.4463
1943	0.5491	0.4463
1944	0.5491	0.4463
1945	0.5491	0.4463
1946	0.5689	0.4393
1947	0.5689	0.4393
1948	0.5689	0.4393
1949	0.5689	0.4393
1950	0.5689	0.4393
1951	0.5689	0.4393
1952	0.5585	0.4324
1953	0.5585	0.4324
1954	0.5386	0.4394
1955	0.5188	0.4464
1956	0.5281	0.4324
1957	0.5281	0.4324
1958	0.5083	0.4394
1959	0.5083	0.4394
1960	0.5083	0.4394
1961	0.5281	0.4324
1962	0.5083	0.4394
1963	0.5083	0.4394
1964	0.5083	0.4394
1965	0.4884	0.4464
1966	0.4884	0.4464
1967	0.4884	0.4464
1968	0.478	0.4394
1969	0.4884	0.4464
1970	0.5083	0.4394
1971	0.5188	0.4464
1972	0.5491	0.4463
1973	0.5596	0.4533
1974	0.57	0.4603
1975	0.5899	0.4533
1976	0.5899	0.4533
1977	0.6004	0.4602
1978	0.6004	0.4602
1979	0.6004	0.4602
1980	0.6097	0.4463
1981	0.6097	0.4463
1982	0.6097	0.4463
1983	0.5899	0.4533
1984	0.5899	0.4533
1985	0.5992	0.4393
1986	0.5794	0.4463
1987	0.5794	0.4463
1988	0.5794	0.4463
1989	0.5794	0.4463
1990	0.5794	0.4463
1991	0.5794	0.4463
1992	0.5794	0.4463
1993	0.5794	0.4463
1994	0.5794	0.4463
1995	0.5689	0.4393
1996	0.5689	0.4393
1997	0.5689	0.4393
1998	0.5491	0.4463
1999	0.5491	0.4463
2000	0.5386	0.4394
2001	0.5386	0.4394
2002	0.5386	0.4394
2003	0.5188	0.4464
2004	0.5188	0.4464
2005	0.5188	0.4464
2006	0.4989	0.4534
2007	0.5083	0.4394
2008	0.5083	0.4394
2009	0.5083	0.4394
2010	0.4884	0.4464
2011	0.4978	0.4324
2012	0.478	0.4394
2013	0.478	0.4394
2014	0.478	0.4394
2015	0.4884	0.4464
2016	0.4884	0.4464
2017	0.5083	0.4394
2018	0.5281	0.4324
2019	0.5281	0.4324
2020	0.5386	0.4394
2021	0.548	0.4254
2022	0.548	0.4254
2023	0.5281	0.4324
2024	0.5375	0.4184
2025	0.5375	0.4184
2026	0.5375	0.4184
2027	0.5375	0.4184
2028	0.5375	0.4184
2029	0.5375	0.4184
2030	0.5281	0.4324
2031	0.548	0.4254
2032	0.5386	0.4394
2033	0.5585	0.4324
2034	0.5585	0.4324
2035	0.5585	0.4324
2036	0.5585	0.4324
2037	0.5386	0.4394
2038	0.5386	0.4394
2039	0.548	0.4254
2040	0.5281	0.4324
2041	0.5281	0.4324
2042	0.5177	0.4254
2043	0.5177	0.4254
2044	0.4978	0.4324
2045	0.5072	0.4185
2046	0.4873	0.4255
2047	0.4769	0.4185
2048	0.457	0.4255
2049	0.4664	0.4115
[truncated: 39,951 more rows]
